# Supplementary material for: Study protocol and implementation details for a pragmatic, stepped-wedge cluster randomised trial of a digital adherence technology to facilitate tuberculosis treatment completion
Source: PubMed Central journal article supplement — BMJ Open. 2020 Nov 27;10(11):e039895. doi: 10.1136/bmjopen-2020-039895 (PMC7703448; doi:10.1136/bmjopen-2020-039895), 2020-11-27
Supplement: bmjopen-2020-039895.draft_revisions.pdf [file bmjopen-2020-039895.draft_revisions.pdf]

# BMJ Open

BMJ Open is committed to open peer review. As part of this commitment we make the peer review history of every article we publish publicly available.

When an article is published we post the peer reviewers' comments and the authors' responses online. We also post the versions of the paper that were used during peer review. These are the versions that the peer review comments apply to.

The versions of the paper that follow are the versions that were submitted during the peer review process. They are not the versions of record or the final published versions. They should not be cited or distributed as the published version of this manuscript.

BMJ Open is an open access journal and the full, final, typeset and author-corrected version of record of the manuscript is available on our site with no access controls, subscription charges or pay-per-view fees (<http://bmjopen.bmj.com>).

If you have any questions on BMJ Open's open peer review process please email [info.bmjopen@bmj.com](mailto:info.bmjopen@bmj.com)

# BMJ Open

## Study protocol and implementation details for a pragmatic, stepped-wedge cluster randomized trial of a digital adherence technology to facilitate tuberculosis treatment completion

|                               |                                                                                                                                                                                                                                                                                                                                                                                                                                                                                                                                                                                                                                                                                                                                                                                                                                                                                                                                                                                                                                                                                                                                                                                                                                                                                                                                                                                                                                                                                                                                                                                                                                                                                                                                                                                                                                                                                                                                                                                                                                                                                                             |
|-------------------------------|-------------------------------------------------------------------------------------------------------------------------------------------------------------------------------------------------------------------------------------------------------------------------------------------------------------------------------------------------------------------------------------------------------------------------------------------------------------------------------------------------------------------------------------------------------------------------------------------------------------------------------------------------------------------------------------------------------------------------------------------------------------------------------------------------------------------------------------------------------------------------------------------------------------------------------------------------------------------------------------------------------------------------------------------------------------------------------------------------------------------------------------------------------------------------------------------------------------------------------------------------------------------------------------------------------------------------------------------------------------------------------------------------------------------------------------------------------------------------------------------------------------------------------------------------------------------------------------------------------------------------------------------------------------------------------------------------------------------------------------------------------------------------------------------------------------------------------------------------------------------------------------------------------------------------------------------------------------------------------------------------------------------------------------------------------------------------------------------------------------|
| Journal:                      | <i>BMJ Open</i>                                                                                                                                                                                                                                                                                                                                                                                                                                                                                                                                                                                                                                                                                                                                                                                                                                                                                                                                                                                                                                                                                                                                                                                                                                                                                                                                                                                                                                                                                                                                                                                                                                                                                                                                                                                                                                                                                                                                                                                                                                                                                             |
| Manuscript ID                 | bmjopen-2020-039895                                                                                                                                                                                                                                                                                                                                                                                                                                                                                                                                                                                                                                                                                                                                                                                                                                                                                                                                                                                                                                                                                                                                                                                                                                                                                                                                                                                                                                                                                                                                                                                                                                                                                                                                                                                                                                                                                                                                                                                                                                                                                         |
| Article Type:                 | Protocol                                                                                                                                                                                                                                                                                                                                                                                                                                                                                                                                                                                                                                                                                                                                                                                                                                                                                                                                                                                                                                                                                                                                                                                                                                                                                                                                                                                                                                                                                                                                                                                                                                                                                                                                                                                                                                                                                                                                                                                                                                                                                                    |
| Date Submitted by the Author: | 29-Apr-2020                                                                                                                                                                                                                                                                                                                                                                                                                                                                                                                                                                                                                                                                                                                                                                                                                                                                                                                                                                                                                                                                                                                                                                                                                                                                                                                                                                                                                                                                                                                                                                                                                                                                                                                                                                                                                                                                                                                                                                                                                                                                                                 |
| Complete List of Authors:     | <p>Crowder, Rebecca; University of California San Francisco, Curry International Tuberculosis Center and Division of Pulmonary and Critical Care Medicine, Zuckerberg San Francisco General Hospital<br/>         Kityamuwesi, Alex; Uganda Tuberculosis Implementation Research Consortium,<br/>         Kiwanuka, Noah; Makerere University College of Health Sciences, School of Public Health<br/>         Lamunu, Maureen; Uganda Tuberculosis Implementation Research Consortium,<br/>         Namale, Catherine; Uganda Tuberculosis Implementation Research Consortium,<br/>         Tinka, Lynn; Uganda Tuberculosis Implementation Research Consortium,</p> <p>Nakate, Agnes; Uganda Tuberculosis Implementation Research Consortium,<br/>         Ggita, Joseph; Uganda Tuberculosis Implementation Research Consortium,<br/>         Turimumahoro, Patricia; Uganda Tuberculosis Implementation Research Consortium,<br/>         Babirye, Diana; Uganda Tuberculosis Implementation Research Consortium,<br/>         Oyuku, Denis; Uganda Tuberculosis Implementation Research Consortium,<br/>         Berger, Christopher; University of California San Francisco, Curry International Tuberculosis Center and Division of Pulmonary and Critical Care Medicine, Zuckerberg San Francisco General Hospital<br/>         Tucker, Austin; Johns Hopkins University Bloomberg School of Public Health, Department of Epidemiology<br/>         Patel, Devika; University of California San Francisco, The Better Lab, Department of Surgery, Zuckerberg San Francisco General Hospital<br/>         Sammann, Amanda; University of California San Francisco, The Better Lab, Department of Surgery, Zuckerberg San Francisco General Hospital<br/>         Dowdy, DW; Johns Hopkins University Bloomberg School of Public Health, Department of Epidemiology<br/>         Stavia, Turyahabwe; Republic of Uganda Ministry of Health, National Tuberculosis and Leprosy Program<br/>         Cattamanchi, A<br/>         Katamba, Achilles; Makerere University College of Health Sciences,</p> |

1  
2  
3  
4  
5  
6  
7  
8  
9  
10  
11  
12  
13  
14  
15  
16  
17  
18  
19  
20  
21  
22  
23  
24  
25  
26  
27  
28  
29  
30  
31  
32  
33  
34  
35  
36  
37  
38  
39  
40  
41  
42  
43  
44  
45  
46  
47  
48  
49  
50  
51  
52  
53  
54  
55  
56  
57  
58  
59  
60

|           |                                                                                                                                                      |
|-----------|------------------------------------------------------------------------------------------------------------------------------------------------------|
|           | Clinical Epidemiology and Biostatistics Unit; Uganda Tuberculosis Implementation Research Consortium, Medicine                                       |
| Keywords: | Tuberculosis < INFECTIOUS DISEASES, Public health < INFECTIOUS DISEASES, International health services < HEALTH SERVICES ADMINISTRATION & MANAGEMENT |
|           |                                                                                                                                                      |

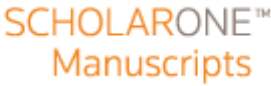

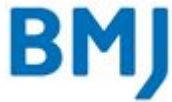

I, the Submitting Author has the right to grant and does grant on behalf of all authors of the Work (as defined in the below author licence), an exclusive licence and/or a non-exclusive licence for contributions from authors who are: i) UK Crown employees; ii) where BMJ has agreed a CC-BY licence shall apply, and/or iii) in accordance with the terms applicable for US Federal Government officers or employees acting as part of their official duties; on a worldwide, perpetual, irrevocable, royalty-free basis to BMJ Publishing Group Ltd ("BMJ") its licensees and where the relevant Journal is co-owned by BMJ to the co-owners of the Journal, to publish the Work in this journal and any other BMJ products and to exploit all rights, as set out in our [licence](#).

The Submitting Author accepts and understands that any supply made under these terms is made by BMJ to the Submitting Author unless you are acting as an employee on behalf of your employer or a postgraduate student of an affiliated institution which is paying any applicable article publishing charge ("APC") for Open Access articles. Where the Submitting Author wishes to make the Work available on an Open Access basis (and intends to pay the relevant APC), the terms of reuse of such Open Access shall be governed by a Creative Commons licence – details of these licences and which [Creative Commons](#) licence will apply to this Work are set out in our licence referred to above.

Other than as permitted in any relevant BMJ Author's Self Archiving Policies, I confirm this Work has not been accepted for publication elsewhere, is not being considered for publication elsewhere and does not duplicate material already published. I confirm all authors consent to publication of this Work and authorise the granting of this licence.

**Title:** Study protocol and implementation details for a pragmatic, stepped-wedge cluster randomized trial of a digital adherence technology to facilitate tuberculosis treatment completion

Authors: Rebecca Crowder<sup>1\*</sup>, Alex Kityamuwesi<sup>2\*</sup>, Noah Kiwanuka<sup>3</sup>, Maureen Lamunu<sup>2</sup>, Catherine Namale<sup>2</sup>, Lynn Kunihiro Tinka<sup>2</sup>, Agnes Sanyu Nakate<sup>2</sup>, Joseph Ggita<sup>2</sup>, Patricia Turimumahoro<sup>2</sup>, Diana Babirye<sup>2</sup>, Denis Oyuku<sup>2</sup>, Christopher Berger<sup>1</sup>, Austin Tucker<sup>4</sup>, Devika Patel<sup>5</sup>, Amanda Sammann<sup>5</sup>, David Dowdy<sup>2,4</sup>, Turyahabwe Stavia<sup>6</sup>, Adithya Cattamanchi<sup>1,2</sup>, Achilles Katamba<sup>2,3</sup>

\* Authors contributed equally

#### Affiliations:

1. Curry International Tuberculosis Center and Division of Pulmonary and Critical Care Medicine, Zuckerberg San Francisco General Hospital, University of California San Francisco, San Francisco, CA, USA
2. Uganda Tuberculosis Implementation Research Consortium, Kampala, Uganda
3. School of Public Health, Makerere University College of Health Sciences, Kampala, Uganda
4. Department of Epidemiology, Johns Hopkins Bloomberg School of Public Health, Baltimore, MD, USA
5. The Better Lab, Department of Surgery, Zuckerberg San Francisco General Hospital, University of California San Francisco, San Francisco, CA, USA
6. National Tuberculosis and Leprosy Program, Uganda Ministry of Health, Kampala, Uganda

#### Correspondence to:

Achilles Katamba  
[axk95@case.edu](mailto:axk95@case.edu)  
Makerere University College of Health Sciences,  
Clinical Epidemiology and Biostatistics Unit  
Mulago Hill Road  
Clinical Research Building Floor 3 Room 3.1  
Kampala, Uganda 21696  
+256-772-575-038

Abstract word count: 248

Manuscript word count (excluding tables and figures): 3,994

1  
2  
3 37 **ABSTRACT**  
4

5  
6 38 **Introduction:** Low-cost digital adherence technologies (DAT) such as 99DOTS have emerged as  
7  
8 39 an alternative to directly observed therapy, (DOT), the current standard for TB treatment  
9  
10 40 supervision. However, there are limited data to support DAT scale-up. The “DOT to DAT” trial  
11  
12 41 aims to evaluate the effectiveness and implementation of a 99DOTS-based TB treatment  
13  
14 42 supervision strategy.

15 43 **Methods and analysis:** This is a pragmatic, stepped-wedge cluster randomized trial, with hybrid  
16  
17 44 type 1 effectiveness-implementation design. The trial will include all adults (estimated N=1890)  
18  
19 45 treated for drug-susceptible pulmonary TB over an 8-month period at 18 TB treatment units in  
20  
21 46 Uganda. Three sites per month will switch from routine care (DOT) to the intervention (99DOTS-  
22  
23 47 based treatment supervision) beginning in Month 2, with the order determined randomly. 99DOTS  
24  
25 48 enables patients to be monitored while self-administering TB medicines. Patients receive daily  
26  
27 49 automated SMS dosing reminders and confirm dosing by calling toll-free numbers. The primary  
28  
29 50 effectiveness outcome is the proportion of patients completing TB treatment. With 18 clusters  
30  
31 51 randomized into 6 steps and an average cluster size of 15 patients per month, the study will have  
32  
33 52 89% power to detect a 10% or greater increase in treatment completion between the routine care  
34  
35 53 and intervention periods. Secondary outcomes include more proximal effectiveness measures as  
36  
37 54 well as quantitative and qualitative assessments of the reach, adoption and implementation of the  
38  
39 55 intervention.

40 56 **Ethics and dissemination:** Ethics approval was granted by institutional review boards at  
41  
42 57 Makerere University School of Public Health and the University of California San Francisco.

43 58  
44 59 **Trial registration number:** PACTR201808609844917  
45  
46  
47  
48  
49  
50  
51  
52  
53  
54  
55  
56  
57  
58  
59  
60

## 60 STRENGTHS AND LIMITATIONS OF THIS STUDY

- 61 • This is the first randomized trial to evaluate a 99DOTS-based strategy for TB treatment  
62 supervision.
- 63 • The intervention was designed using the PRECEDE framework and adapted for local  
64 context in Uganda using human-centered design.
- 65 • Trial outcomes were selected using the RE-AIM framework.
- 66 • The intervention was implemented by health facility staff and will be assessed using  
67 routinely collected data to approximate the real-world impact of this intervention.

## 69 INTRODUCTION

70 Tuberculosis (TB) is the leading infectious cause of death worldwide despite being a preventable  
71 and curable disease.(1) Poor adherence to medication continues to be a major obstacle to TB  
72 elimination, resulting in prolonged infectiousness, emergence of multidrug resistance, and  
73 increased risk of poor treatment outcomes. The World Health Organization (WHO)-recommended  
74 strategy, directly observed therapy short-course (DOTS), has been the standard-of-care for TB  
75 treatment supervision since the 1990s. As part of this strategy, a health worker is expected to  
76 observe patients swallow each dose of anti-TB medication. However, directly observed therapy  
77 (DOT) is time-consuming, costly and inconvenient for both patients and providers, while its  
78 implementation is also difficult to monitor.(2, 3) Not surprisingly, TB treatment success rates  
79 remain below the 90% target in most high-burden countries, despite reported DOT coverage over  
80 90%.(1)

81  
82 With the increase in mobile phone penetration among patients and healthcare workers in high TB  
83 burden countries,(4) digital adherence technologies (DATs) could address some of the challenges  
84 associated with implementation of the DOTS strategy in a patient-centered manner. To date, such  
85 technologies have received only a conditional recommendation by the WHO due to very low  
86 quality of evidence.(5) The first randomized trial of a DAT found that SMS reminders alone did  
87 not improve medication adherence, but a medication event reminder monitor did.(6) However,  
88 treatment outcomes did not improve and both trials and programmatic research have shown  
89 variable uptake of DAT.(7-10)

1  
2  
3 90  
4  
5  
6 91 The “DOT to DAT” trial aims to evaluate the effectiveness, implementation and cost-effectiveness  
7 92 of a culturally and contextually adapted version of 99DOTS in Uganda. 99DOTS is a low-cost  
8  
9 93 DAT wherein patients self-report medication adherence by calling toll-free phone numbers hidden  
10  
11 94 underneath pills in blister packs.(11) We present the research methods used for the first  
12  
13 95 randomized trial to evaluate the effectiveness and implementation of a 99DOTS-based strategy for  
14  
15 96 TB treatment supervision in routine care settings.

16 97  
17  
18 98 **Conceptual basis for trial design**  
19  
20 99 Numerous conceptual frameworks have emerged to improve the implementation and success of  
21  
22 100 health interventions through theory-based design and evaluation. The PRECEDE framework  
23  
24 101 guided the development of the 99DOTS-based intervention strategy, while the RE-AIM  
25  
26 102 framework guided its comprehensive evaluation. Behavior change models including the  
27  
28 103 Theoretical Domains Framework (TDF)(12, 13) and the Unified Theory of Acceptance and Use  
29  
30 104 of Technology (UTAUT)(14, 15) guided the assessment and analysis of patient- and provider-level  
31  
32 105 barriers to adoption and implementation of 99DOTS.

33  
34 107 The PRECEDE framework emphasizes the need for multi-faceted health promotion interventions  
35  
36 108 to address predisposing, enabling, and reinforcing factors in order to achieve behavior change.(16)  
37  
38 109 The 99DOTS-based intervention was designed to address key predisposing (social isolation and  
39  
40 110 the high direct and indirect cost of clinic visits), enabling (inability of health facility staff to focus  
41  
42 111 limited time and resources on non-adherent patients), and reinforcing (a lack of real-time  
43  
44 112 information on patient adherence to medications) factors related to TB treatment adherence  
45  
46 113 identified through the literature and formative human factors research that preceded the trial.(11)

47  
48 115 The RE-AIM framework was designed to ensure that trials not only assess the effect of  
49  
50 116 interventions but also their translatability and public health impact.(17, 18) This hybrid type 1 trial  
51  
52 117 therefore focuses on the effectiveness of the 99DOTS-based intervention in improving TB  
53  
54 118 treatment outcomes, but concurrently examines its reach into the target population, adoption by  
55  
56 119 target settings and staff, and implementation fidelity and costs.(19) The goal of assessing



1  
2  
3 120 translatability and public health impact is further enhanced through pragmatic design choices for  
4  
5 121 each element of the trial in order to maximize applicability in real-world settings.(20)

6  
7 122

## 8 123 **METHODS AND ANALYSIS**

### 9 124 **Study aims**

10  
11 125 The primary aim of the trial is to determine whether a 99DOTS-based strategy increases the  
12  
13 126 proportion of patients who complete TB treatment in comparison to routine care. Secondary aims  
14  
15 127 include 1) comparing short-term treatment outcomes and loss to follow-up between the  
16  
17 128 intervention and routine care arms; 2) assessing the reach, adoption and implementation of the  
18  
19 129 99DOTS-based strategy; and 3) evaluating the incremental costs and cost-effectiveness of the  
20  
21 130 99DOTS-based strategy as compared to routine care from the health system perspective. Our  
22  
23 131 hypotheses are that the 99DOTS-based strategy will lead to higher treatment completion, have  
24  
25 132 high uptake among patients and providers, and be cost-effective.

26 133

### 27 134 **Study design**

28  
29 135 This is a pragmatic, stepped-wedge randomized trial, with a hybrid type 1 implementation-  
30  
31 136 effectiveness design.(19) As depicted in **Figure 1**, the intervention strategy was sequentially  
32  
33 137 introduced at 3 sites each in Months 2-6, with all sites under routine care in Month 1 and all sites  
34  
35 138 using the intervention strategy in Month 8. The month of switch from control to intervention  
36  
37 139 (buffer period) will be excluded from analysis. We chose the stepped-wedge trial design to  
38  
39 140 maximize equity and acceptability (all sites will receive the intervention), minimize logistical  
40  
41 141 constraints associated with introducing the intervention simultaneously at a large number of sites,  
42  
43 142 account for secular outcome trends, and allow for iterative learning and changes in intervention  
44  
45 143 roll-out as would occur during eventual scale-up. We chose a highly pragmatic approach to trial  
46  
47 144 implementation, as described in sections below, to understand the real-world impact of the  
48  
49 145 99DOTS-based intervention strategy.

50 146

### 51 147 **Study Setting**

52 148 The trial is being conducted at 18 TB treatment units within hospitals and health centers across 15  
53  
54 149 districts of Uganda. The TB treatment units are affiliated with the Uganda National Tuberculosis  
55  
56 150 and Leprosy Program (NTLP) and provide TB treatment free of charge using a mix of facility- and

1  
2  
3 151 community-based DOTS. Uganda was chosen as the trial setting due to its high TB burden (200  
4 cases/100,000 in 2017) and low treatment success rate (72% in 2017).(1)  
5  
6

7 153  
8 154 Study sites were selected after reviewing 2016 TB treatment outcomes and 2017 TB case finding  
9 data reported to the NTLP from all 1514 registered TB treatment units. We included treatment  
10 155 units that 1) diagnosed >10 pulmonary TB patients/month in 2017, 2) were not located within  
11 156 Kampala District (many active ongoing projects in this district), 3) were located within 225 km of  
12 157 Kampala City (for feasibility), and 4) had a pulmonary TB treatment success rate in 2016 <80%  
13 158 (to be able to show an impact).  
14  
15  
16  
17  
18

19 160  
20 161 Of the 1514 treatment units registered with the Uganda NTLP, 23 treatment units met our inclusion  
21 162 criteria (**Figure 2**). The majority (n=1435) diagnosed fewer than 10 TB patients/month in 2017,  
22 163 17 are located within Kampala district, 31 are not within 225 km of Kampala district, and 9 had a  
23 164 treatment success rate >80% in 2016. Of the 23 remaining treatment units, we selected 18 located  
24 165 in 15 districts (10 in Central, 7 in Eastern and 1 in Western Uganda) in consultation with the NTLP.  
25 166 Project staff visited the Chief Administrative Officers, District Health Officers and Facility  
26 167 Directors for the 18 sites to discuss the study. All signed a memorandum of agreement for their  
27 168 site to participate in the study.  
28  
29  
30  
31  
32  
33

34 169  
35  
36 170 **Study participants**  
37 171 All adult patients treated for drug-susceptible pulmonary TB at participating treatment units during  
38 172 the study period will be eligible for inclusion. Children, patients treated for drug-resistant or  
39 173 extrapulmonary TB, and patients transferred to another facility to complete treatment will be  
40 174 excluded. Surveys to assess 99DOTS implementation will be conducted in a random subset of  
41 175 eligible patients and all health workers involved in TB treatment supervision at each treatment  
42 176 unit. Time-and-motion studies to assess costs will also be conducted among health workers  
43 177 involved in TB treatment supervision at each treatment unit.  
44  
45  
46  
47  
48  
49

50 178  
51 179 **Routine care and intervention strategies**  
52 180 *Routine care.* The conventional approach to TB treatment supervision in Uganda is a mix of  
53 181 community- and facility-based DOT. At the time of treatment initiation, treatment unit staff record  
54  
55  
56  
57  
58  
59

182 patient demographic and clinical details in the NTLP register and are supposed to provide TB-  
 183 focused counseling. Most TB patients are treated using community-based DOT, wherein they  
 184 name a treatment supporter and are provided with a 2-week supply of medicines in the first two  
 185 months (intensive phase) and a one-month supply of medicines in the next four months  
 186 (continuation phase) of TB treatment. Patients take their medicines from home (with or without  
 187 observation by a treatment supporter) and return to the health facility for medication refills. At  
 188 each refill visit, health facility staff are supposed to assess adherence via patient self-report and  
 189 provide additional counseling. Health facility staff are also supposed to call or visit patients who  
 190 do not return for refills, but patient follow-up is limited across health facilities.

191  
 192 *Intervention.* The 99DOTS-based intervention strategy is comprised of four main components that  
 193 address distinct barriers to successful TB treatment (**Table 1**):

- 194 1) Daily automated SMS dosing reminders
- 195 2) Daily dosing confirmation using toll-free phone calls
- 196 3) Weekly automated interactive voice response (IVR) check-in phone calls
- 197 4) Differential management protocol based on dosing history and response to IVR check-in

199 **Table 1. Components of the “DOT to DAT” trial intervention and corresponding barriers**  
 200 **addressed.**

| Component                                                    | Barrier addressed                                                                                                                                                                       |
|--------------------------------------------------------------|-----------------------------------------------------------------------------------------------------------------------------------------------------------------------------------------|
| 1 Daily dosing reminders via automated SMS                   | Addresses high cost of clinic visits for patients and assists with memory and planning processes known to be importance to adherence.                                                   |
| 2 Daily dosing confirmation via toll-free phone calls        | Addresses high cost of clinic visits for patients, lack of real-time information for providers on patient adherence to medications.                                                     |
| 3 Weekly check-in via interactive voice response phone calls | Addresses lack of social support and feeling of isolation during TB treatment; shown to be effective in other contexts at increasing connection with CHW and reducing social isolation. |
| 4 Differential management protocol                           | Addresses limited time and resources among TB treatment unit staff and the need to focus on non-adherent patients.                                                                      |

202

1  
2  
3 203 Formative research using human-centered design was used to adapt the generic 99DOTS product  
4 204 to the local context, including changes to the envelope design and addition of a rotating series of  
5 205 educational/motivational audio messages heard when patients call in to report dosing (details of  
6 206 the formative research will be reported in a separate publication) (**Figure 3**).

7  
8  
9 207  
10  
11 208 TB treatment unit staff will be requested to offer 99DOTS-based treatment supervision to all  
12 209 eligible patients initiating TB treatment, and to register patients who accept 99DOTS-based  
13 210 treatment supervision on the 99DOTS platform via a mobile app. Given the pragmatic nature of  
14 211 the trial, the decision to offer and accept 99DOTS-based treatment supervision will be made by  
15 212 treatment unit staff and patients, respectively. Once registered, treatment unit staff will instruct  
16 213 patients on how to use the 99DOTS pill pack and make a call to the 99DOTS system using the  
17 214 toll-free number revealed when pills are pushed out of the medication blister pack (**Figure 3**). Staff  
18 215 will also help patients personalize their 99DOTS pill pack by choosing a decorative cover,  
19 216 educational or motivational sticker for the inside flap, writing in their health worker's contact  
20 217 information, and selecting a time of day to take their medication (**Figure 3**).

21 218  
22 219 Each dose confirmed via phone call is logged by 99DOTS and reflected on the 99DOTS  
23 220 smartphone app dashboard, viewable by treatment unit staff. During routine drug refill visits (same  
24 221 schedule as described for routine care period), health facility staff are asked to review adherence  
25 222 data in the 99DOTS app before providing counseling. At the conclusion of the intensive phase of  
26 223 treatment, patients with adherence >90% are offered the option of returning back to the health  
27 224 facility after two months instead of the standard one month.

28 225  
29 226 Health facilities using 99DOTS to manage TB patient treatment will be provided one smartphone  
30 227 per facility, minimal funds to cover cell phone data, and an average of 300,000 US\$ (approximately  
31 228 \$82 USD) per month to facilitate patient follow-up. Treatment unit staff will not be provided any  
32 229 extra compensation to reflect future conditions under eventual scale-up.

### 33 230 34 231 **Implementation considerations**

35 232 99DOTS training will occur at each health facility during the month in which it is scheduled to  
36 233 switch to the intervention. Project staff and the District TB Officer will conduct a 2-3 day training

234 jointly at each health facility using standardized training materials. Treatment unit staff will be  
235 trained on how to register patients on the 99DOTS platform via a smartphone app, counsel patients  
236 regarding use of 99DOTS, use the 99DOTS application to review dosing history, and conduct  
237 differential management based on dosing history and response to weekly check-ins. Mentored  
238 patient enrollment on 99DOTS will be conducted as part of the training.

239

240 During the trial, treatment unit staff will make all decisions regarding management of TB patients  
241 in both the routine care and intervention periods. Research staff will not be onsite after training  
242 with the exception of 2-3 day quarterly site visits to resolve data cleaning queries and implement  
243 surveys and health economic sub-studies. Thus, the implementation is highly pragmatic and meant  
244 to approximate how 99DOTS would be used at treatment units in the absence of a research study.

245

## 246 **Randomization**

247 The 18 health facilities will be randomly assigned to one of the six groups (**Figure 1**) using a  
248 simple, unrestricted two-stage process. This process will occur by simple drawing during a public  
249 randomization ceremony held in Kampala, Uganda. A representative from each TB treatment unit,  
250 district health officers, and Uganda NTLP staff will be invited to attend the ceremony. First, health  
251 facilities will be randomly assigned into six groups of three by having health facility  
252 representatives each draw 1 of 18 balls (3 each labeled A-F) from an opaque bag; and second, each  
253 group will be randomly assigned into the sequence order in which they will switch from routine  
254 care to the intervention by drawing of 6 balls labeled 1-6 from an opaque bag.

255

## 256 **Blinding**

257 Blinding of the assigned intervention is not feasible given intervention implementation at the  
258 health facility level. Where possible, the investigators and study staff, with the exception of the  
259 statistician and data manager, are masked to step and intervention assignment.

260

## 261 **Data collection and management**

### 262 *Patient-level data collection*

263 Consistent with the pragmatic design, TB treatment outcomes will be assessed by extracting data  
264 on all eligible patients from routine Uganda NTLP TB treatment registers used at all treatment

1  
2  
3 265 units. Project staff will train two health workers at each site (one primary, one backup) identified  
4  
5 266 by the health facility director to take photos of the register every 2-4 weeks for the duration of the  
6  
7 267 project using a camera-enabled smartphone, and to upload the photos to a central secure server.  
8  
9 268 Health workers will be trained to delete photos from the phone after upload confirmation.  
10  
11 269 Completeness of TB treatment registers will be assessed, and at quarterly site visits, study staff  
12  
13 270 will provide re-training as needed and resolve data cleaning queries. Study staff will extract data  
14  
15 271 from photos of TB registers and enter data into a secure database use Research Electronic Data  
16  
17 272 Capture software (REDCap).(21) Data queries for missing or nonsensical data will be reviewed  
18  
19 273 with treatment unit staff at quarterly site visits.

20  
21  
22  
23  
24  
25  
26  
27  
28  
29  
30

#### 274 275 *99DOTS process metrics data collection*

276 During the intervention period at each site, process metric data to assess the implementation of  
277 each component of the intervention strategy will be extracted from the 99DOTS server. The server  
278 logs all calls made by patients to confirm dosing and doses entered manually by providers, all SMS  
279 messages sent to patients, and all IVR calls sent to patients and their responses.

31  
32  
33  
34  
35  
36  
37  
38  
39  
40  
41  
42  
43  
44  
45

#### 281 *Qualitative data collection*

282 Surveys will be conducted with 10 randomly selected eligible patients enrolled on 99DOTS (5  
283 women and 5 men) and 1-2 eligible providers per site (180 total patients, 18-36 total providers)  
284 beginning in Month 10 of the trial to assess the acceptability of the 99DOTS-based intervention  
285 strategy. Research staff will contact selected patients by phone to review the verbal consent script,  
286 answer questions the patient may have, and administer the survey to consenting patients. Provider  
287 surveys and interviews will be conducted during quarterly site visits beginning in Month 13 of the  
288 trial to assess factors influencing the adoption and implementation of 99DOTS.

46  
47  
48  
49  
50  
51  
52  
53  
54  
55  
56  
57  
58  
59  
60

#### 290 *Health system cost data collection*

291 Treatment unit staff at each site will be interviewed to gain a more complete understanding of the  
292 activities and staff involved in the operations of 99DOTS. Time-and-motion studies of health  
293 workers (anticipated to be 3-6 health workers per site, depending on the number of staff involved  
294 in delivering 99DOTS) will be carried out at six clinics, sampled to ensure good representation of  
295 clinic volume and geography. These time-and-motion studies will be performed on a quarterly

1  
2  
3 296 basis in conjunction with site visits and will consist of direct observation of all activities conducted  
4  
5 297 by treatment unit staff over the corresponding 1-2 day evaluation period, for a total 6-12 days of  
6  
7 298 observation every three months over the course of the 14-month study period. During these  
8  
9 299 observation periods, the time and resources required to perform all activities related to TB  
10  
11 300 treatment (e.g., medication preparation, contacting patients, observing medication doses, etc.) will  
12  
13 301 be recorded. Additional costing data will be collected to assess the cost of implementing and  
14  
15 302 maintaining 99DOTS technical assistance (budget records from Everwell Health Solutions, the  
16  
17 303 creator of 99DOTS) and the cost at point of care (surveys of project staff to track resource use  
18  
19 304 during trainings). Overhead costs will be estimated using an ingredients approach, incorporating  
20  
21 305 the cost of supplies, building/space, vehicles, and human resources with incorporation of recurrent  
22  
23 306 costs such as security, vehicle maintenance costs, and all supplies (medical and administrative).

307

### 308 **Outcomes**

309 Trial outcomes were selected in accordance with the RE-AIM evaluation framework (**Table 2**).  
310 The primary effectiveness outcome is the proportion of patients who complete TB treatment,  
311 defined as having an outcome of “cured” or “treatment completed” recorded in the unit TB  
312 treatment register. Secondary effectiveness outcomes include the proportion who persist on  
313 treatment through the intensive phase (*i.e.*, 56 days of treatment), the proportion lost to follow-up  
314 and estimated number of incremental disability-adjusted life years (DALYs) averted. Reach is  
315 defined as the proportion of eligible patients enrolled on 99DOTS. Adoption metrics include the  
316 proportion of scheduled doses confirmed by patient phone calls and the proportion of weekly IVR  
317 check-in calls to which patients send a response. Implementation outcomes include delivery of the  
318 intervention (proportions of daily SMS dosing reminders and weekly IVR check-in calls sent by  
319 the 99DOTS platform and received on patient handsets), acceptability (as assessed by patient and  
320 health worker surveys and interviews) and incremental costs of the 99DOTS-based intervention  
321 strategy.

322

323 **Table 2.** Outcome definitions and data source by RE-AIM dimension.

| Outcome type          | Outcome                                                          | Data Source                                    |
|-----------------------|------------------------------------------------------------------|------------------------------------------------|
| <b>Reach</b>          |                                                                  |                                                |
|                       | Proportion enrolled on 99DOTS                                    | 99DOTS server,<br>Treatment register           |
| <b>Effectiveness</b>  |                                                                  |                                                |
| Primary               | Proportion treated successfully                                  | Treatment register                             |
| Secondary             | Proportion with persistence                                      | Treatment register                             |
| Secondary             | Proportion lost to follow-up                                     | Treatment register                             |
| Secondary             | Incremental cost per patient treated successfully                | Time and motion surveys;<br>budgetary analysis |
| <b>Adoption</b>       |                                                                  |                                                |
|                       | Proportion of scheduled doses confirmed by phone call            | 99DOTS server                                  |
|                       | Proportion of weekly IVR calls to which patients send a response | 99DOTS server                                  |
| <b>Implementation</b> |                                                                  |                                                |
|                       | Proportion of daily SMS sent by 99DOTS platform                  | 99DOTS server                                  |
|                       | Proportion of daily SMS received on patient handset              | 99DOTS server                                  |
|                       | Proportion of weekly IVR calls sent by 99DOTS platform           | 99DOTS server                                  |
|                       | Proportion of weekly IVR calls received on patient handset       | 99DOTS server                                  |

324

325 *Power and sample size*

326 The trial aims to demonstrate the superiority of the 99DOTS-based strategy. The sample size was  
327 calculated for the primary effectiveness outcome, proportion of patients treated successfully, using  
328 formulae appropriate for stepped-wedge trials. A type I error of 5% and power of at least 90% is  
329 assumed. Based on 2017 data, the harmonic mean number of patients initiating treatment for drug-  
330 susceptible pulmonary TB per month across participating treatment units was 15. Thus, we  
331 anticipate that approximately 1890 patients will initiate treatment over the 8-month enrollment  
332 period (945 in the pre- and 945 in the post-implementation phases across treatment units). The trial  
333 will have 89% power to demonstrate that our strategy increases the proportion of patients treated  
334 successfully by 10% or more (assumptions: alpha=0.05; intraclass correlation coefficient, ICC =  
335 0.001 calculated using 2017 NTLTP data for the 18 treatment units; pre-implementation treatment



1  
2  
3 336 success = 51% based on 2017 NTLP data for the 18 treatment units; calculations performed using  
4  
5 337 steppedwedge command in Stata 14).

6  
7 338

### 8 339 **Analysis**

9  
10 340 The primary effectiveness analysis will be conducted at the health facility level using multivariable  
11  
12 341 mixed effect logit models. Analysis will be done for intention to treat and per protocol (excluding  
13  
14 342 patients who are not enrolled on 99DOTS during the intervention period at each site) populations  
15  
16 343 in Stata using melogit and meqrlogit commands. Models will adjust for the longitudinal design  
17  
18 344 and clustering by site, nested within group. Patients initiating treatment during the month in which  
19  
20 345 sites switch from routine treatment supervision to the intervention strategy will be excluded (buffer  
21  
22 346 period). Confounders, selected *a priori*, will be included in the model as fixed effects. Secondary  
23  
24 347 effectiveness outcomes (**Table 2**) will be analyzed in the same manner. Subgroup analyses will  
25  
26 348 stratify by gender, HIV status, and health facility. Sensitivity analyses will be performed to assess  
27  
28 349 the robustness of our findings with respect to treatment outcomes for patients lost to follow up, the  
30  
31 350 staged intervention roll out, intervention timing and buffer period, and analysis method.

29 351  
30  
31 352 Quantitative reach, adoption and implementation outcomes will be summarized descriptively.  
32  
33 353 Comparative analyses will identify factors independently associated with reach, adoption and  
34  
35 354 implementation of intervention components. Health economic data will be used to calculate the  
36  
37 355 incremental cost-effectiveness of the intervention strategy from a societal perspective, measured  
38  
39 356 as the incremental cost per successfully completed treatment, comparing 99DOTS relative to  
40  
41 357 routine care.

42  
43 358

### 43 359 **Ethics and dissemination**

44  
45 360 Patients can choose to use or not use 99DOTS at any time during the intervention period. 99DOTS  
46  
47 361 enables closer patient monitoring than routine TB treatment supervision, but loss of patient privacy  
48  
49 362 is a potential concern. Data on this are being collected through patient surveys. Because of the  
50  
51 363 low-risk nature of the research, the Principal Investigators will be responsible for monitoring the  
52  
53 364 data, assuring protocol compliance, and conducting safety reviews on a quarterly basis. External  
54  
55 365 monitoring is provided by a Stop TB Partnership project officer and Monitoring and Evaluation  
56  
57 366 consultant. The Principal Investigator will submit regular progress reports, including

1  
2  
3 367 recommendations on whether the project should continue unchanged, require modification, or  
4  
5 368 close to enrollment.

6 369  
7  
8 370 Ethics approval was granted by institutional review boards at Makerere University School of  
9  
10 371 Public Health and the University of California San Francisco. To ensure that the study captures all  
11  
12 372 eligible adults initiating treatment at study sites, a waiver of informed consent was granted to  
13  
14 373 access routine TB treatment data recorded in standard NTLP registers. The protocol was registered  
15  
16 374 with the Pan-African Clinical Trials Registry (PACTR201808609844917) on 31 August 2018,  
17  
18 375 updated 11 July 2019 and complies with reporting guidelines outlined in the stepped-wedge trial  
19  
20 376 extension of the Consolidated Standards of Reporting Trials.(22) Any major changes in protocol  
21  
22 377 will be approved by the Stop TB Partnership project officer and both ethics committess and  
23  
24 378 registered with the PACTR. The full protocol and statistical code will be made available upon  
25  
26 379 request.

27 380  
28 381 Findings will be disseminated through peer-reviewed publications, presentations at scientific  
29  
30 382 conferences and presentations to key stakeholders. Drs. Cattamanchi, Katamba and Kiwanuka will  
31  
32 383 have access to the final dataset; the participant-level dataset will be made available to other  
33  
34 384 investigators who have IRB approval to analyze the data.

35 385

### 36 386 **Patient and public involvement**

37 387 Patients and members of the public were involved throughout the research process. The NTLP was  
38  
39 388 involved in identifying health facilities to participate, selecting study design, and conducting  
40  
41 389 research through partnership with District Health Officers and participating health facilities.  
42  
43 390 Patients, health workers, and community members were involved in intervention design through a  
44  
45 391 human-centered design process, which included several rounds of focus groups and interviews  
46  
47 392 with stakeholders. Health workers at the 18 health facilities implemented 99DOTS without  
48  
49 393 research staff present and assisted in data collection by completing routine TB treatment registers  
50  
51 394 and sending photos of the register to the research team through secure means.

52 395

### 53 396 **DISCUSSION**

1  
2  
3 397 99DOTS is a low-cost DAT that has the potential to improve TB treatment outcomes and the  
4  
5 398 patient experience of TB treatment in Uganda and other high-burden settings. Here, we describe  
6  
7 399 the first randomized trial designed to evaluate the effectiveness of a 99DOTS-based TB treatment  
8  
9 400 supervision strategy as part of routine care in a high burden setting. Other novel aspects of the trial  
10  
11 401 include our use of human-centered design to adapt 99DOTS to the local context with the goal of  
12  
13 402 increasing patient engagement with the technology, the use of theory and implementation science  
14  
15 403 frameworks to guide intervention design and evaluation, and our focus on simultaneously  
16  
17 404 assessing implementation and costs to guide scale-up decisions.  
18

19 406 Many aspects of this trial are intentionally pragmatic to ensure the outcomes reflect what can be  
20  
21 407 expected under non-research conditions.(23) The study population will include all patients with  
22  
23 408 drug susceptible pulmonary TB, with the exception of children. A waiver of consent was obtained  
24  
25 409 for patient-level data collection such that research staff will not be required to be onsite to enroll  
26  
27 410 and consent patients. Primary and key secondary outcomes will be assessed using routine data  
28  
29 411 available through NTLP registers and the 99DOTS platform, with focused additional data  
30  
31 412 collection for implementation and cost outcomes. The intervention will be implemented by routine  
32  
33 413 TB treatment unit staff, who also will make all decisions to offer 99DOTS-based treatment  
34  
35 414 supervision to patients. At the same time, the stepped-wedge randomized trial design provides a  
36  
37 415 rigorous assessment of intervention effect.  
38

39 417 In summary, this pragmatic, hybrid type 1 effectiveness-implementation trial is well poised to  
40  
41 418 assess both the effectiveness of an adapted 99DOTS-based intervention and potential barriers and  
42  
43 419 facilitators to its scale-up if successful. The design and implementation of this trial intend to  
44  
45 420 generate results to inform decisions on whether and how to implement 99DOTS in Uganda and  
46  
47 421 other high burden countries.  
48

49  
50  
51  
52  
53  
54  
55  
56  
57  
58  
59  
60 422

## References

1. World Health Organization. Global Tuberculosis Report Geneva: World Health Organization; 2017 [Available from: [https://www.who.int/tb/publications/global\\_report/gtbr2017\\_main\\_text.pdf](https://www.who.int/tb/publications/global_report/gtbr2017_main_text.pdf)].
2. Izudi J, Tamwesigire IK, Bajunirwe F. Explaining the successes and failures of tuberculosis treatment programs; a tale of two regions in rural eastern Uganda. *BMC Health Services Research*. 2019;19(1):979.
3. Fiseha D, Demissie M. Assessment of Directly Observed Therapy (DOT) following tuberculosis regimen change in Addis Ababa, Ethiopia: a qualitative study. *BMC Infect Dis*. 2015;15:405.
4. GSMA Intelligence. The Mobile Economy - Africa London GSMA; 2016 [Available from: <https://www.gsma.com/mobileeconomy/africa/>].
5. World Health Organization. Treatment of tuberculosis: guidelines for treatment of drug-susceptible tuberculosis and patient care (2017 update). Geneva; 2017.
6. Liu X, Lewis JJ, Zhang H, Lu W, Zhang S, Zheng G, et al. Effectiveness of Electronic Reminders to Improve Medication Adherence in Tuberculosis Patients: A Cluster-Randomised Trial. *PLoS medicine*. 2015;12(9):e1001876-e.
7. Subbaraman R, de Mondesert L, Musiimenta A, Pai M, Mayer KH, Thomas BE, et al. Digital adherence technologies for the management of tuberculosis therapy: mapping the landscape and research priorities. *BMJ Glob Health*. 2018;3(5):e001018.
8. Liu X, Lewis JJ, Zhang H, Lu W, Zhang S, Zheng G, et al. Effectiveness of Electronic Reminders to Improve Medication Adherence in Tuberculosis Patients: A Cluster-Randomised Trial. *PLoS Med*. 2015;12(9):e1001876.
9. Liu X, Blaschke T, Thomas B, De Geest S, Jiang S, Gao Y, et al. Usability of a Medication Event Reminder Monitor System (MERM) by Providers and Patients to Improve Adherence in the Management of Tuberculosis. *Int J Environ Res Public Health*. 2017;14(10).
10. Thakkar D, Piparva KG, Lakkad SG. A pilot project: 99DOTS information communication technology-based approach for tuberculosis treatment in Rajkot district. *Lung India*. 2019;36(2):108-11.
11. Cross A, Gupta N, Liu B, Nair V, Kumar A, Kuttan R, et al. 99DOTS: A Low-Cost Approach to Monitoring and Improving Medication Adherence. Tenth International Conference on Information and Communication Technologies and Development. ICTD. 2019.
12. Atkins L, Francis J, Islam R, O'Connor D, Patey A, Ivers N, et al. A guide to using the Theoretical Domains Framework of behaviour change to investigate implementation problems. *Implement Sci*. 2017;12(1):77.
13. French SD, Green SE, O'Connor DA, McKenzie JE, Francis JJ, Michie S, et al. Developing theory-informed behaviour change interventions to implement evidence into practice: a systematic approach using the Theoretical Domains Framework. *Implement Sci*. 2012;7:38.
14. Sarfaraz J. Unified theory of acceptance and use of technology (Utaut) model-mobile banking. *Journal of Internet Banking and Commerce*. 2017;22(3):1-20.
15. Venkatesh V, Thong JY, Xu X. Consumer acceptance and use of information technology: extending the unified theory of acceptance and use of technology. *MIS quarterly*. 2012:157-78.
16. Green LW, Kreuter MW. Health promotion planning: An educational and ecological approach: McGraw-Hill; 1993.

- 1  
2  
3 469 17. Glasgow RE, Vogt TM, Boles SM. Evaluating the public health impact of health  
4 470 promotion interventions: the RE-AIM framework. American journal of public health.  
5 471 1999;89(9):1322-7.  
6  
7 472 18. Gaglio B, Shoup JA, Glasgow RE. The RE-AIM framework: a systematic review of use  
8 473 over time. American journal of public health. 2013;103(6):e38-e46.  
9 474 19. Curran GM, Bauer M, Mittman B, Pyne JM, Stetler C. Effectiveness-implementation  
10 475 hybrid designs: combining elements of clinical effectiveness and implementation research to  
11 476 enhance public health impact. Med Care. 2012;50(3):217-26.  
12 477 20. Loudon K, Treweek S, Sullivan F, Donnan P, Thorpe KE, Zwarenstein M. The PRECIS-  
13 478 2 tool: designing trials that are fit for purpose. BMJ. 2015;350:h2147.  
14 479 21. Harris PA, Taylor R, Minor BL, Elliott V, Fernandez M, O'Neal L, et al. The REDCap  
15 480 consortium: Building an international community of software platform partners. J Biomed  
16 481 Inform. 2019;95:103208.  
17 482 22. Hemming K, Taljaard M, McKenzie JE, Hooper R, Copas A, Thompson JA, et al.  
18 483 Reporting of stepped wedge cluster randomised trials: extension of the CONSORT 2010  
19 484 statement with explanation and elaboration. BMJ. 2018;363:k1614.  
20 485 23. Loudon K, Treweek S, Sullivan F, Donnan P, Thorpe KE, Zwarenstein M. The PRECIS-  
21 486 2 tool: designing trials that are fit for purpose. BMJ : British Medical Journal. 2015;350:h2147.  
22  
23 487  
24  
25  
26 488

1  
2  
3 489 **Acknowledgements**  
4

5 490 We would like to thank the patients and health facility staff who make this research possible, as  
6  
7 491 well as the Uganda NTLP, for their collaboration on this protocol.  
8

9 492

10 493 **Authors' contributions**  
11

12 494 AC and AKa conceived and designed the study. RC, AKi, ML, CN, LKT, ASN, JG, PT, DB, DO,  
13  
14 495 CB, AT, DP, AM, DD, TS, AC and AKa participated in implementation of the study. RC, AKi,  
15  
16 496 AC, and AKa drafted the manuscript. All authors reviewed and approved the manuscript.  
17

18 497

19 498 **Funding**

20 499 This Project is supported by the Stop TB Partnership's TB REACH initiative, grant number  
21  
22 500 STBP/TBREACH/GSA/W6-37, which is funded by the Government of Canada, the Bill &  
23  
24 501 Melinda Gates Foundation, and the United States Agency for International Development. The  
25  
26 502 study sponsor is not involved in data collection, analysis or interpretation.  
27

28 503

29 504 **Competing Interests**  
30

31 505 The authors have no conflicts of interest to report.  
32

33 506  
34  
35  
36  
37  
38  
39  
40  
41  
42  
43  
44  
45  
46  
47  
48  
49  
50  
51  
52  
53  
54  
55  
56  
57  
58  
59  
60

|         | Month |   |   |   |   |   |   |   |
|---------|-------|---|---|---|---|---|---|---|
|         | 1     | 2 | 3 | 4 | 5 | 6 | 7 | 8 |
| Group 1 |       |   |   |   |   |   |   |   |
| Group 2 |       |   |   |   |   |   |   |   |
| Group 3 |       |   |   |   |   |   |   |   |
| Group 4 |       |   |   |   |   |   |   |   |
| Group 5 |       |   |   |   |   |   |   |   |
| Group 6 |       |   |   |   |   |   |   |   |

  

|  |                                             |
|--|---------------------------------------------|
|  | Routine care (control period)               |
|  | Switch to 99DOTS (buffer period)            |
|  | 99DOTS implementation (intervention period) |

**Figure 1. 99DOTS Randomization and Enrollment Schedule.** The trial includes 18 health facilities divided into 6 equal size groups (3 health facilities per group). The health facilities all continue routine TB treatment supervision in Month 1, begin switching to the 99DOTS-based intervention strategy in Month 2 (one group per month in a random order), and all use the intervention strategy in Month 8.

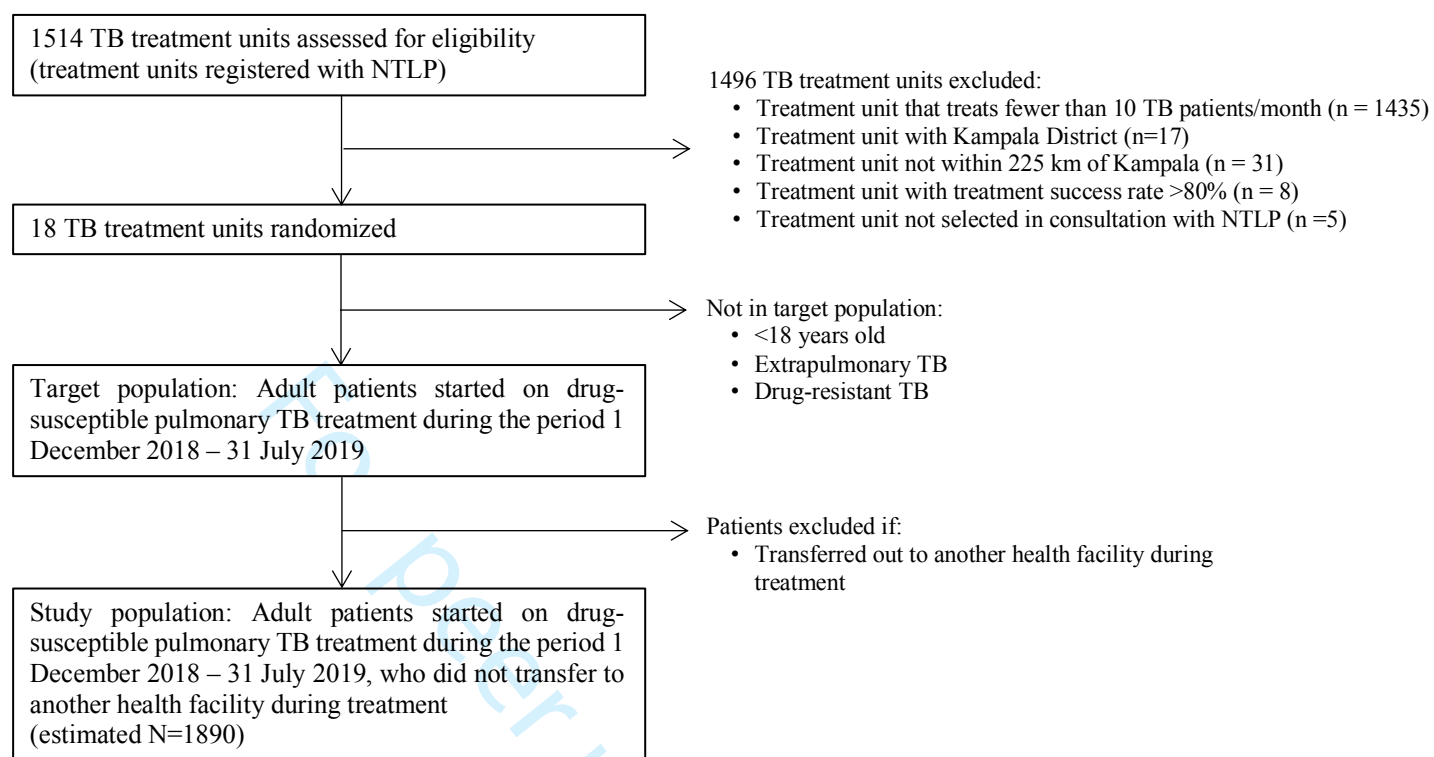

29  
30  
31  
32  
33  
34  
35  
36  
37  
38  
39  
40  
41  
42  
43  
44  
45  
46  
47  
48  
49  
50  
51  
52  
53  
54  
55  
56  
57  
58  
59  
60

**Figure 2. Flow diagram of TB treatment units and patients included in the DOT to DAT trial.** Eighteen TB treatment units were randomized, and all eligible patients initiating TB treatment at these facilities during the study period will be analyzed.



## Original 99DOTS Envelope

Front of envelope

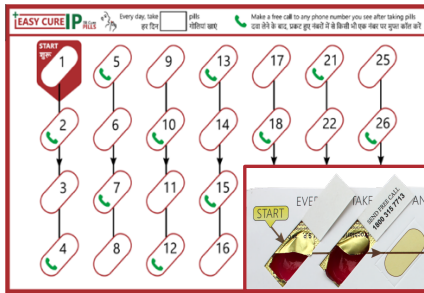

Back of envelope

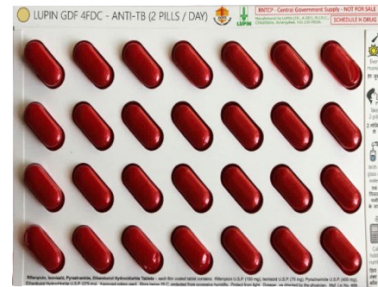

## Adapted 99DOTS envelope

Front cover

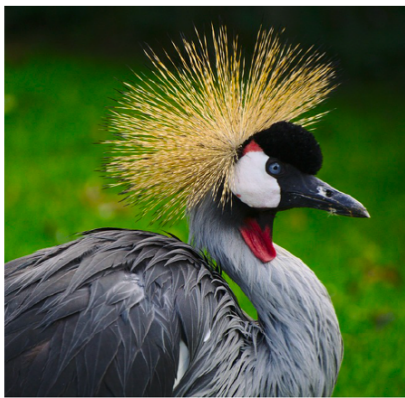

Inside cover

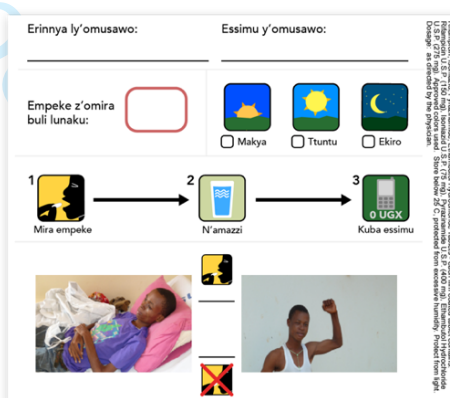

Back of envelope

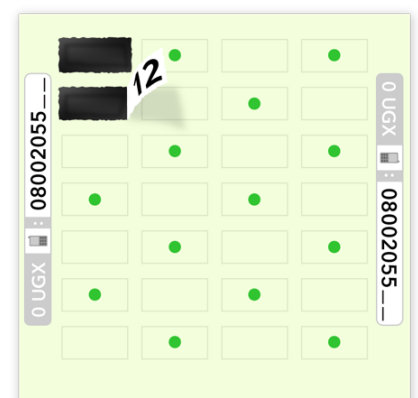

**Figure 3. Original and adapted versions of the 99DOTS envelope.** The original 99DOTS envelope was two-sided (top left and right). The original envelope was adapted using human-centered design to add a decorative front cover to hide pills (and thereby reduce potential stigma; bottom left); include space for writing in the health worker's name and phone number, simplified pictorial instructions for taking pills, and motivational imagery on the inside cover (bottom middle); and provide simplified guide to the order in which to take pills on the back cover (bottom right). In addition, the audio tone heard when patients make daily phone calls to report medication dosing was replaced with a rotating series of educational or motivational messages recorded by local health workers.

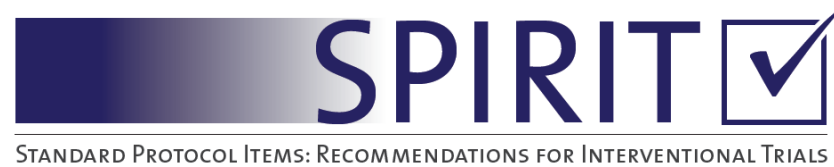

SPIRIT 2013 Checklist: Recommended items to address in a clinical trial protocol and related documents\*

| Section/item                      | Item No | Description                                                                                                                                                                                                                                                                              | Addressed on page number |
|-----------------------------------|---------|------------------------------------------------------------------------------------------------------------------------------------------------------------------------------------------------------------------------------------------------------------------------------------------|--------------------------|
| <b>Administrative information</b> |         |                                                                                                                                                                                                                                                                                          |                          |
| Title                             | 1       | Descriptive title identifying the study design, population, interventions, and, if applicable, trial acronym                                                                                                                                                                             | <u>1</u>                 |
| Trial registration                | 2a      | Trial identifier and registry name. If not yet registered, name of intended registry                                                                                                                                                                                                     | <u>2, 14</u>             |
|                                   | 2b      | All items from the World Health Organization Trial Registration Data Set                                                                                                                                                                                                                 | <u>14</u>                |
| Protocol version                  | 3       | Date and version identifier                                                                                                                                                                                                                                                              | <u>14</u>                |
| Funding                           | 4       | Sources and types of financial, material, and other support                                                                                                                                                                                                                              | <u>18</u>                |
| Roles and responsibilities        | 5a      | Names, affiliations, and roles of protocol contributors                                                                                                                                                                                                                                  | <u>1,18</u>              |
|                                   | 5b      | Name and contact information for the trial sponsor                                                                                                                                                                                                                                       | <u>18</u>                |
|                                   | 5c      | Role of study sponsor and funders, if any, in study design; collection, management, analysis, and interpretation of data; writing of the report; and the decision to submit the report for publication, including whether they will have ultimate authority over any of these activities | <u>18</u>                |
|                                   | 5d      | Composition, roles, and responsibilities of the coordinating centre, steering committee, endpoint adjudication committee, data management team, and other individuals or groups overseeing the trial, if applicable (see Item 21a for data monitoring committee)                         | <u>N/A</u>               |

|    |                                                           |     |                                                                                                                                                                                                                                                                                                                                                                                |                       |
|----|-----------------------------------------------------------|-----|--------------------------------------------------------------------------------------------------------------------------------------------------------------------------------------------------------------------------------------------------------------------------------------------------------------------------------------------------------------------------------|-----------------------|
| 1  | <b>Introduction</b>                                       |     |                                                                                                                                                                                                                                                                                                                                                                                |                       |
| 2  |                                                           |     |                                                                                                                                                                                                                                                                                                                                                                                |                       |
| 3  | Background and rationale                                  | 6a  | Description of research question and justification for undertaking the trial, including summary of relevant studies (published and unpublished) examining benefits and harms for each intervention                                                                                                                                                                             | <u>3-4</u>            |
| 4  |                                                           |     |                                                                                                                                                                                                                                                                                                                                                                                |                       |
| 5  |                                                           |     |                                                                                                                                                                                                                                                                                                                                                                                |                       |
| 6  |                                                           | 6b  | Explanation for choice of comparators                                                                                                                                                                                                                                                                                                                                          | <u>5</u>              |
| 7  |                                                           |     |                                                                                                                                                                                                                                                                                                                                                                                |                       |
| 8  | Objectives                                                | 7   | Specific objectives or hypotheses                                                                                                                                                                                                                                                                                                                                              | <u>5</u>              |
| 9  |                                                           |     |                                                                                                                                                                                                                                                                                                                                                                                |                       |
| 10 | Trial design                                              | 8   | Description of trial design including type of trial (eg, parallel group, crossover, factorial, single group), allocation ratio, and framework (eg, superiority, equivalence, noninferiority, exploratory)                                                                                                                                                                      | <u>5</u>              |
| 11 |                                                           |     |                                                                                                                                                                                                                                                                                                                                                                                |                       |
| 12 |                                                           |     |                                                                                                                                                                                                                                                                                                                                                                                |                       |
| 13 |                                                           |     |                                                                                                                                                                                                                                                                                                                                                                                |                       |
| 14 | <b>Methods: Participants, interventions, and outcomes</b> |     |                                                                                                                                                                                                                                                                                                                                                                                |                       |
| 15 |                                                           |     |                                                                                                                                                                                                                                                                                                                                                                                |                       |
| 16 | Study setting                                             | 9   | Description of study settings (eg, community clinic, academic hospital) and list of countries where data will be collected. Reference to where list of study sites can be obtained                                                                                                                                                                                             | <u>5-6</u>            |
| 17 |                                                           |     |                                                                                                                                                                                                                                                                                                                                                                                |                       |
| 18 |                                                           |     |                                                                                                                                                                                                                                                                                                                                                                                |                       |
| 19 | Eligibility criteria                                      | 10  | Inclusion and exclusion criteria for participants. If applicable, eligibility criteria for study centres and individuals who will perform the interventions (eg, surgeons, psychotherapists)                                                                                                                                                                                   | <u>6, Figure 2</u>    |
| 20 |                                                           |     |                                                                                                                                                                                                                                                                                                                                                                                |                       |
| 21 |                                                           |     |                                                                                                                                                                                                                                                                                                                                                                                |                       |
| 22 | Interventions                                             | 11a | Interventions for each group with sufficient detail to allow replication, including how and when they will be administered                                                                                                                                                                                                                                                     | <u>6-8, Figure 3</u>  |
| 23 |                                                           |     |                                                                                                                                                                                                                                                                                                                                                                                |                       |
| 24 |                                                           | 11b | Criteria for discontinuing or modifying allocated interventions for a given trial participant (eg, drug dose change in response to harms, participant request, or improving/worsening disease)                                                                                                                                                                                 | <u>13-14</u>          |
| 25 |                                                           |     |                                                                                                                                                                                                                                                                                                                                                                                |                       |
| 26 |                                                           | 11c | Strategies to improve adherence to intervention protocols, and any procedures for monitoring adherence (eg, drug tablet return, laboratory tests)                                                                                                                                                                                                                              | <u>9</u>              |
| 27 |                                                           |     |                                                                                                                                                                                                                                                                                                                                                                                |                       |
| 28 |                                                           | 11d | Relevant concomitant care and interventions that are permitted or prohibited during the trial                                                                                                                                                                                                                                                                                  | <u>N/A</u>            |
| 29 |                                                           |     |                                                                                                                                                                                                                                                                                                                                                                                |                       |
| 30 | Outcomes                                                  | 12  | Primary, secondary, and other outcomes, including the specific measurement variable (eg, systolic blood pressure), analysis metric (eg, change from baseline, final value, time to event), method of aggregation (eg, median, proportion), and time point for each outcome. Explanation of the clinical relevance of chosen efficacy and harm outcomes is strongly recommended | <u>11-12, Table 2</u> |
| 31 |                                                           |     |                                                                                                                                                                                                                                                                                                                                                                                |                       |
| 32 |                                                           |     |                                                                                                                                                                                                                                                                                                                                                                                |                       |
| 33 | Participant timeline                                      | 13  | Time schedule of enrolment, interventions (including any run-ins and washouts), assessments, and visits for participants. A schematic diagram is highly recommended (see Figure)                                                                                                                                                                                               | <u>5, Figure 1</u>    |
| 34 |                                                           |     |                                                                                                                                                                                                                                                                                                                                                                                |                       |
| 35 |                                                           |     |                                                                                                                                                                                                                                                                                                                                                                                |                       |
| 36 |                                                           |     |                                                                                                                                                                                                                                                                                                                                                                                |                       |
| 37 |                                                           |     |                                                                                                                                                                                                                                                                                                                                                                                |                       |
| 38 |                                                           |     |                                                                                                                                                                                                                                                                                                                                                                                |                       |
| 39 |                                                           |     |                                                                                                                                                                                                                                                                                                                                                                                |                       |
| 40 |                                                           |     |                                                                                                                                                                                                                                                                                                                                                                                |                       |
| 41 |                                                           |     |                                                                                                                                                                                                                                                                                                                                                                                |                       |
| 42 |                                                           |     |                                                                                                                                                                                                                                                                                                                                                                                |                       |
| 43 |                                                           |     |                                                                                                                                                                                                                                                                                                                                                                                |                       |
| 44 |                                                           |     |                                                                                                                                                                                                                                                                                                                                                                                |                       |
| 45 |                                                           |     |                                                                                                                                                                                                                                                                                                                                                                                |                       |
| 46 |                                                           |     |                                                                                                                                                                                                                                                                                                                                                                                |                       |

|    |                                                                     |     |                                                                                                                                                                                                                                                                                                                                                                                                              |              |
|----|---------------------------------------------------------------------|-----|--------------------------------------------------------------------------------------------------------------------------------------------------------------------------------------------------------------------------------------------------------------------------------------------------------------------------------------------------------------------------------------------------------------|--------------|
| 1  | Sample size                                                         | 14  | Estimated number of participants needed to achieve study objectives and how it was determined, including clinical and statistical assumptions supporting any sample size calculations                                                                                                                                                                                                                        | <u>12-13</u> |
| 2  |                                                                     |     |                                                                                                                                                                                                                                                                                                                                                                                                              |              |
| 3  |                                                                     |     |                                                                                                                                                                                                                                                                                                                                                                                                              |              |
| 4  | Recruitment                                                         | 15  | Strategies for achieving adequate participant enrolment to reach target sample size                                                                                                                                                                                                                                                                                                                          | <u>12</u>    |
| 5  |                                                                     |     |                                                                                                                                                                                                                                                                                                                                                                                                              |              |
| 6  |                                                                     |     |                                                                                                                                                                                                                                                                                                                                                                                                              |              |
| 7  | <b>Methods: Assignment of interventions (for controlled trials)</b> |     |                                                                                                                                                                                                                                                                                                                                                                                                              |              |
| 8  | Allocation:                                                         |     |                                                                                                                                                                                                                                                                                                                                                                                                              |              |
| 9  |                                                                     |     |                                                                                                                                                                                                                                                                                                                                                                                                              |              |
| 10 |                                                                     |     |                                                                                                                                                                                                                                                                                                                                                                                                              |              |
| 11 | Sequence generation                                                 | 16a | Method of generating the allocation sequence (eg, computer-generated random numbers), and list of any factors for stratification. To reduce predictability of a random sequence, details of any planned restriction (eg, blocking) should be provided in a separate document that is unavailable to those who enrol participants or assign interventions                                                     | <u>9</u>     |
| 12 |                                                                     |     |                                                                                                                                                                                                                                                                                                                                                                                                              |              |
| 13 |                                                                     |     |                                                                                                                                                                                                                                                                                                                                                                                                              |              |
| 14 |                                                                     |     |                                                                                                                                                                                                                                                                                                                                                                                                              |              |
| 15 |                                                                     |     |                                                                                                                                                                                                                                                                                                                                                                                                              |              |
| 16 | Allocation concealment mechanism                                    | 16b | Mechanism of implementing the allocation sequence (eg, central telephone; sequentially numbered, opaque, sealed envelopes), describing any steps to conceal the sequence until interventions are assigned                                                                                                                                                                                                    | <u>9</u>     |
| 17 |                                                                     |     |                                                                                                                                                                                                                                                                                                                                                                                                              |              |
| 18 |                                                                     |     |                                                                                                                                                                                                                                                                                                                                                                                                              |              |
| 19 |                                                                     |     |                                                                                                                                                                                                                                                                                                                                                                                                              |              |
| 20 |                                                                     |     |                                                                                                                                                                                                                                                                                                                                                                                                              |              |
| 21 | Implementation                                                      | 16c | Who will generate the allocation sequence, who will enrol participants, and who will assign participants to interventions                                                                                                                                                                                                                                                                                    | <u>9</u>     |
| 22 |                                                                     |     |                                                                                                                                                                                                                                                                                                                                                                                                              |              |
| 23 |                                                                     |     |                                                                                                                                                                                                                                                                                                                                                                                                              |              |
| 24 | Blinding (masking)                                                  | 17a | Who will be blinded after assignment to interventions (eg, trial participants, care providers, outcome assessors, data analysts), and how                                                                                                                                                                                                                                                                    | <u>9</u>     |
| 25 |                                                                     |     |                                                                                                                                                                                                                                                                                                                                                                                                              |              |
| 26 |                                                                     |     |                                                                                                                                                                                                                                                                                                                                                                                                              |              |
| 27 |                                                                     | 17b | If blinded, circumstances under which unblinding is permissible, and procedure for revealing a participant's allocated intervention during the trial                                                                                                                                                                                                                                                         | <u>9</u>     |
| 28 |                                                                     |     |                                                                                                                                                                                                                                                                                                                                                                                                              |              |
| 29 |                                                                     |     |                                                                                                                                                                                                                                                                                                                                                                                                              |              |
| 30 |                                                                     |     |                                                                                                                                                                                                                                                                                                                                                                                                              |              |
| 31 | <b>Methods: Data collection, management, and analysis</b>           |     |                                                                                                                                                                                                                                                                                                                                                                                                              |              |
| 32 |                                                                     |     |                                                                                                                                                                                                                                                                                                                                                                                                              |              |
| 33 | Data collection methods                                             | 18a | Plans for assessment and collection of outcome, baseline, and other trial data, including any related processes to promote data quality (eg, duplicate measurements, training of assessors) and a description of study instruments (eg, questionnaires, laboratory tests) along with their reliability and validity, if known. Reference to where data collection forms can be found, if not in the protocol | <u>9-11</u>  |
| 34 |                                                                     |     |                                                                                                                                                                                                                                                                                                                                                                                                              |              |
| 35 |                                                                     |     |                                                                                                                                                                                                                                                                                                                                                                                                              |              |
| 36 |                                                                     |     |                                                                                                                                                                                                                                                                                                                                                                                                              |              |
| 37 |                                                                     |     |                                                                                                                                                                                                                                                                                                                                                                                                              |              |
| 38 |                                                                     |     |                                                                                                                                                                                                                                                                                                                                                                                                              |              |
| 39 |                                                                     | 18b | Plans to promote participant retention and complete follow-up, including list of any outcome data to be collected for participants who discontinue or deviate from intervention protocols                                                                                                                                                                                                                    | <u>11-12</u> |
| 40 |                                                                     |     |                                                                                                                                                                                                                                                                                                                                                                                                              |              |
| 41 |                                                                     |     |                                                                                                                                                                                                                                                                                                                                                                                                              |              |
| 42 |                                                                     |     |                                                                                                                                                                                                                                                                                                                                                                                                              |              |

|    |                                 |     |                                                                                                                                                                                                                                                                                                                                       |              |
|----|---------------------------------|-----|---------------------------------------------------------------------------------------------------------------------------------------------------------------------------------------------------------------------------------------------------------------------------------------------------------------------------------------|--------------|
| 1  | Data management                 | 19  | Plans for data entry, coding, security, and storage, including any related processes to promote data quality (eg, double data entry; range checks for data values). Reference to where details of data management procedures can be found, if not in the protocol                                                                     | <u>9-11</u>  |
| 2  |                                 |     |                                                                                                                                                                                                                                                                                                                                       |              |
| 3  |                                 |     |                                                                                                                                                                                                                                                                                                                                       |              |
| 4  |                                 |     |                                                                                                                                                                                                                                                                                                                                       |              |
| 5  | Statistical methods             | 20a | Statistical methods for analysing primary and secondary outcomes. Reference to where other details of the statistical analysis plan can be found, if not in the protocol                                                                                                                                                              | <u>13</u>    |
| 6  |                                 |     |                                                                                                                                                                                                                                                                                                                                       |              |
| 7  |                                 |     |                                                                                                                                                                                                                                                                                                                                       |              |
| 8  |                                 | 20b | Methods for any additional analyses (eg, subgroup and adjusted analyses)                                                                                                                                                                                                                                                              | <u>13-14</u> |
| 9  |                                 |     |                                                                                                                                                                                                                                                                                                                                       |              |
| 10 |                                 | 20c | Definition of analysis population relating to protocol non-adherence (eg, as randomised analysis), and any statistical methods to handle missing data (eg, multiple imputation)                                                                                                                                                       | <u>13</u>    |
| 11 |                                 |     |                                                                                                                                                                                                                                                                                                                                       |              |
| 12 |                                 |     |                                                                                                                                                                                                                                                                                                                                       |              |
| 13 |                                 |     |                                                                                                                                                                                                                                                                                                                                       |              |
| 14 | <b>Methods: Monitoring</b>      |     |                                                                                                                                                                                                                                                                                                                                       |              |
| 15 |                                 |     |                                                                                                                                                                                                                                                                                                                                       |              |
| 16 | Data monitoring                 | 21a | Composition of data monitoring committee (DMC); summary of its role and reporting structure; statement of whether it is independent from the sponsor and competing interests; and reference to where further details about its charter can be found, if not in the protocol. Alternatively, an explanation of why a DMC is not needed | <u>13-14</u> |
| 17 |                                 |     |                                                                                                                                                                                                                                                                                                                                       |              |
| 18 |                                 |     |                                                                                                                                                                                                                                                                                                                                       |              |
| 19 |                                 |     |                                                                                                                                                                                                                                                                                                                                       |              |
| 20 |                                 |     |                                                                                                                                                                                                                                                                                                                                       |              |
| 21 |                                 |     |                                                                                                                                                                                                                                                                                                                                       |              |
| 22 |                                 | 21b | Description of any interim analyses and stopping guidelines, including who will have access to these interim results and make the final decision to terminate the trial                                                                                                                                                               | <u>13</u>    |
| 23 |                                 |     |                                                                                                                                                                                                                                                                                                                                       |              |
| 24 |                                 |     |                                                                                                                                                                                                                                                                                                                                       |              |
| 25 | Harms                           | 22  | Plans for collecting, assessing, reporting, and managing solicited and spontaneously reported adverse events and other unintended effects of trial interventions or trial conduct                                                                                                                                                     | <u>13</u>    |
| 26 |                                 |     |                                                                                                                                                                                                                                                                                                                                       |              |
| 27 |                                 |     |                                                                                                                                                                                                                                                                                                                                       |              |
| 28 | Auditing                        | 23  | Frequency and procedures for auditing trial conduct, if any, and whether the process will be independent from investigators and the sponsor                                                                                                                                                                                           | <u>13</u>    |
| 29 |                                 |     |                                                                                                                                                                                                                                                                                                                                       |              |
| 30 |                                 |     |                                                                                                                                                                                                                                                                                                                                       |              |
| 31 |                                 |     |                                                                                                                                                                                                                                                                                                                                       |              |
| 32 | <b>Ethics and dissemination</b> |     |                                                                                                                                                                                                                                                                                                                                       |              |
| 33 |                                 |     |                                                                                                                                                                                                                                                                                                                                       |              |
| 34 | Research ethics approval        | 24  | Plans for seeking research ethics committee/institutional review board (REC/IRB) approval                                                                                                                                                                                                                                             | <u>14</u>    |
| 35 |                                 |     |                                                                                                                                                                                                                                                                                                                                       |              |
| 36 |                                 |     |                                                                                                                                                                                                                                                                                                                                       |              |
| 37 | Protocol amendments             | 25  | Plans for communicating important protocol modifications (eg, changes to eligibility criteria, outcomes, analyses) to relevant parties (eg, investigators, REC/IRBs, trial participants, trial registries, journals, regulators)                                                                                                      | <u>14</u>    |
| 38 |                                 |     |                                                                                                                                                                                                                                                                                                                                       |              |
| 39 |                                 |     |                                                                                                                                                                                                                                                                                                                                       |              |
| 40 |                                 |     |                                                                                                                                                                                                                                                                                                                                       |              |
| 41 |                                 |     |                                                                                                                                                                                                                                                                                                                                       |              |
| 42 |                                 |     |                                                                                                                                                                                                                                                                                                                                       |              |

|    |                               |     |                                                                                                                                                                                                                                                                                     |            |
|----|-------------------------------|-----|-------------------------------------------------------------------------------------------------------------------------------------------------------------------------------------------------------------------------------------------------------------------------------------|------------|
| 1  | Consent or assent             | 26a | Who will obtain informed consent or assent from potential trial participants or authorised surrogates, and how (see Item 32)                                                                                                                                                        | <u>14</u>  |
| 2  |                               |     |                                                                                                                                                                                                                                                                                     |            |
| 3  |                               |     |                                                                                                                                                                                                                                                                                     |            |
| 4  |                               | 26b | Additional consent provisions for collection and use of participant data and biological specimens in ancillary studies, if applicable                                                                                                                                               | <u>N/A</u> |
| 5  |                               |     |                                                                                                                                                                                                                                                                                     |            |
| 6  |                               |     |                                                                                                                                                                                                                                                                                     |            |
| 7  | Confidentiality               | 27  | How personal information about potential and enrolled participants will be collected, shared, and maintained in order to protect confidentiality before, during, and after the trial                                                                                                | <u>14</u>  |
| 8  |                               |     |                                                                                                                                                                                                                                                                                     |            |
| 9  |                               |     |                                                                                                                                                                                                                                                                                     |            |
| 10 | Declaration of interests      | 28  | Financial and other competing interests for principal investigators for the overall trial and each study site                                                                                                                                                                       | <u>18</u>  |
| 11 |                               |     |                                                                                                                                                                                                                                                                                     |            |
| 12 |                               |     |                                                                                                                                                                                                                                                                                     |            |
| 13 | Access to data                | 29  | Statement of who will have access to the final trial dataset, and disclosure of contractual agreements that limit such access for investigators                                                                                                                                     | <u>14</u>  |
| 14 |                               |     |                                                                                                                                                                                                                                                                                     |            |
| 15 |                               |     |                                                                                                                                                                                                                                                                                     |            |
| 16 |                               |     |                                                                                                                                                                                                                                                                                     |            |
| 17 | Ancillary and post-trial care | 30  | Provisions, if any, for ancillary and post-trial care, and for compensation to those who suffer harm from trial participation                                                                                                                                                       | <u>N/A</u> |
| 18 |                               |     |                                                                                                                                                                                                                                                                                     |            |
| 19 |                               |     |                                                                                                                                                                                                                                                                                     |            |
| 20 | Dissemination policy          | 31a | Plans for investigators and sponsor to communicate trial results to participants, healthcare professionals, the public, and other relevant groups (eg, via publication, reporting in results databases, or other data sharing arrangements), including any publication restrictions | <u>14</u>  |
| 21 |                               |     |                                                                                                                                                                                                                                                                                     |            |
| 22 |                               |     |                                                                                                                                                                                                                                                                                     |            |
| 23 |                               |     |                                                                                                                                                                                                                                                                                     |            |
| 24 |                               | 31b | Authorship eligibility guidelines and any intended use of professional writers                                                                                                                                                                                                      | <u>18</u>  |
| 25 |                               |     |                                                                                                                                                                                                                                                                                     |            |
| 26 |                               | 31c | Plans, if any, for granting public access to the full protocol, participant-level dataset, and statistical code                                                                                                                                                                     | <u>14</u>  |
| 27 |                               |     |                                                                                                                                                                                                                                                                                     |            |
| 28 |                               |     |                                                                                                                                                                                                                                                                                     |            |
| 29 | <b>Appendices</b>             |     |                                                                                                                                                                                                                                                                                     |            |
| 30 |                               |     |                                                                                                                                                                                                                                                                                     |            |
| 31 | Informed consent materials    | 32  | Model consent form and other related documentation given to participants and authorised surrogates                                                                                                                                                                                  | <u>N/A</u> |
| 32 |                               |     |                                                                                                                                                                                                                                                                                     |            |
| 33 |                               |     |                                                                                                                                                                                                                                                                                     |            |
| 34 | Biological specimens          | 33  | Plans for collection, laboratory evaluation, and storage of biological specimens for genetic or molecular analysis in the current trial and for future use in ancillary studies, if applicable                                                                                      | <u>N/A</u> |
| 35 |                               |     |                                                                                                                                                                                                                                                                                     |            |
| 36 |                               |     |                                                                                                                                                                                                                                                                                     |            |

\*It is strongly recommended that this checklist be read in conjunction with the SPIRIT 2013 Explanation & Elaboration for important clarification on the items. Amendments to the protocol should be tracked and dated. The SPIRIT checklist is copyrighted by the SPIRIT Group under the Creative Commons "[Attribution-NonCommercial-NoDerivs 3.0 Unported](https://creativecommons.org/licenses/by-nc-nd/3.0/)" license.

# BMJ Open

## Study protocol and implementation details for a pragmatic, stepped-wedge cluster randomized trial of a digital adherence technology to facilitate tuberculosis treatment completion

|                               |                                                                                                                                                                                                                                                                                                                                                                                                                                                                                                                                                                                                                                                                                                                                                                                                                                                                                                                                                                                                                                                                                                                                                                                                                                                                                                                                                                                                                                                                                                                                                                                                                                                                                                                                                                                                                                                                                                                                                                                                                                                                                                  |
|-------------------------------|--------------------------------------------------------------------------------------------------------------------------------------------------------------------------------------------------------------------------------------------------------------------------------------------------------------------------------------------------------------------------------------------------------------------------------------------------------------------------------------------------------------------------------------------------------------------------------------------------------------------------------------------------------------------------------------------------------------------------------------------------------------------------------------------------------------------------------------------------------------------------------------------------------------------------------------------------------------------------------------------------------------------------------------------------------------------------------------------------------------------------------------------------------------------------------------------------------------------------------------------------------------------------------------------------------------------------------------------------------------------------------------------------------------------------------------------------------------------------------------------------------------------------------------------------------------------------------------------------------------------------------------------------------------------------------------------------------------------------------------------------------------------------------------------------------------------------------------------------------------------------------------------------------------------------------------------------------------------------------------------------------------------------------------------------------------------------------------------------|
| Journal:                      | <i>BMJ Open</i>                                                                                                                                                                                                                                                                                                                                                                                                                                                                                                                                                                                                                                                                                                                                                                                                                                                                                                                                                                                                                                                                                                                                                                                                                                                                                                                                                                                                                                                                                                                                                                                                                                                                                                                                                                                                                                                                                                                                                                                                                                                                                  |
| Manuscript ID                 | bmjopen-2020-039895.R1                                                                                                                                                                                                                                                                                                                                                                                                                                                                                                                                                                                                                                                                                                                                                                                                                                                                                                                                                                                                                                                                                                                                                                                                                                                                                                                                                                                                                                                                                                                                                                                                                                                                                                                                                                                                                                                                                                                                                                                                                                                                           |
| Article Type:                 | Protocol                                                                                                                                                                                                                                                                                                                                                                                                                                                                                                                                                                                                                                                                                                                                                                                                                                                                                                                                                                                                                                                                                                                                                                                                                                                                                                                                                                                                                                                                                                                                                                                                                                                                                                                                                                                                                                                                                                                                                                                                                                                                                         |
| Date Submitted by the Author: | 25-Sep-2020                                                                                                                                                                                                                                                                                                                                                                                                                                                                                                                                                                                                                                                                                                                                                                                                                                                                                                                                                                                                                                                                                                                                                                                                                                                                                                                                                                                                                                                                                                                                                                                                                                                                                                                                                                                                                                                                                                                                                                                                                                                                                      |
| Complete List of Authors:     | <p>Crowder, Rebecca; University of California San Francisco, Center for Tuberculosis and Division of Pulmonary and Critical Care Medicine, San Francisco General Hospital<br/>         Kityamuwesi, Alex; Uganda Tuberculosis Implementation Research Consortium,<br/>         Kiwanuka, Noah; Makerere University College of Health Sciences, School of Public Health<br/>         Lamunu, Maureen; Uganda Tuberculosis Implementation Research Consortium,<br/>         Namale, Catherine; Uganda Tuberculosis Implementation Research Consortium,<br/>         Tinka, Lynn; Uganda Tuberculosis Implementation Research Consortium,</p> <p>Nakate, Agnes; Uganda Tuberculosis Implementation Research Consortium,<br/>         Ggita, Joseph; Uganda Tuberculosis Implementation Research Consortium,<br/>         Turimumahoro, Patricia; Uganda Tuberculosis Implementation Research Consortium,<br/>         Babirye, Diana; Uganda Tuberculosis Implementation Research Consortium,<br/>         Oyuku, Denis; Uganda Tuberculosis Implementation Research Consortium,<br/>         Berger, Christopher; University of California San Francisco, Center for Tuberculosis and Division of Pulmonary and Critical Care Medicine, San Francisco General Hospital<br/>         Tucker, Austin; Johns Hopkins University Bloomberg School of Public Health, Department of Epidemiology<br/>         Patel, Devika; University of California San Francisco, The Better Lab, Department of Surgery, Zuckerberg San Francisco General Hospital<br/>         Sammann, Amanda; University of California San Francisco, The Better Lab, Department of Surgery, Zuckerberg San Francisco General Hospital<br/>         Dowdy, DW; Johns Hopkins University Bloomberg School of Public Health, Department of Epidemiology<br/>         Stavia, Turyahabwe; Republic of Uganda Ministry of Health, National Tuberculosis and Leprosy Program<br/>         Cattamanchi, A; University of California San Francisco, Center for Tuberculosis and Division of Pulmonary and Critical Care Medicine, San</p> |

1  
2  
3  
4  
5  
6  
7  
8  
9  
10  
11  
12  
13  
14  
15  
16  
17  
18  
19  
20  
21  
22  
23  
24  
25  
26  
27  
28  
29  
30  
31  
32  
33  
34  
35  
36  
37  
38  
39  
40  
41  
42  
43  
44  
45  
46  
47  
48  
49  
50  
51  
52  
53  
54  
55  
56  
57  
58  
59  
60

|                                                        |                                                                                                                                                                                                                       |
|--------------------------------------------------------|-----------------------------------------------------------------------------------------------------------------------------------------------------------------------------------------------------------------------|
|                                                        | Francisco General Hospital<br>Katamba, Achilles; Makerere University College of Health Sciences,<br>Clinical Epidemiology and Biostatistics Unit; Uganda Tuberculosis<br>Implementation Research Consortium, Medicine |
| <b>&lt;b&gt;Primary Subject<br/>Heading&lt;/b&gt;:</b> | Infectious diseases                                                                                                                                                                                                   |
| Secondary Subject Heading:                             | Public health, Global health                                                                                                                                                                                          |
| Keywords:                                              | Tuberculosis < INFECTIOUS DISEASES, Public health < INFECTIOUS<br>DISEASES, International health services < HEALTH SERVICES<br>ADMINISTRATION & MANAGEMENT                                                            |
|                                                        |                                                                                                                                                                                                                       |

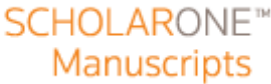



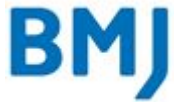

I, the Submitting Author has the right to grant and does grant on behalf of all authors of the Work (as defined in the below author licence), an exclusive licence and/or a non-exclusive licence for contributions from authors who are: i) UK Crown employees; ii) where BMJ has agreed a CC-BY licence shall apply, and/or iii) in accordance with the terms applicable for US Federal Government officers or employees acting as part of their official duties; on a worldwide, perpetual, irrevocable, royalty-free basis to BMJ Publishing Group Ltd ("BMJ") its licensees and where the relevant Journal is co-owned by BMJ to the co-owners of the Journal, to publish the Work in this journal and any other BMJ products and to exploit all rights, as set out in our [licence](#).

The Submitting Author accepts and understands that any supply made under these terms is made by BMJ to the Submitting Author unless you are acting as an employee on behalf of your employer or a postgraduate student of an affiliated institution which is paying any applicable article publishing charge ("APC") for Open Access articles. Where the Submitting Author wishes to make the Work available on an Open Access basis (and intends to pay the relevant APC), the terms of reuse of such Open Access shall be governed by a Creative Commons licence – details of these licences and which [Creative Commons](#) licence will apply to this Work are set out in our licence referred to above.

Other than as permitted in any relevant BMJ Author's Self Archiving Policies, I confirm this Work has not been accepted for publication elsewhere, is not being considered for publication elsewhere and does not duplicate material already published. I confirm all authors consent to publication of this Work and authorise the granting of this licence.

1  
2  
3 1 **Title:** Study protocol and implementation details for a pragmatic, stepped-wedge cluster  
4 2 randomized trial of a digital adherence technology to facilitate tuberculosis treatment completion  
5 3

6 4 Authors: Rebecca Crowder<sup>1\*</sup>, Alex Kityamuwesi<sup>2\*</sup>, Noah Kiwanuka<sup>3</sup>, Maureen Lamunu<sup>2</sup>,  
7 5 Catherine Namale<sup>2</sup>, Lynn Kunihiro Tinka<sup>2</sup>, Agnes Sanyu Nakate<sup>2</sup>, Joseph Ggita<sup>2</sup>, Patricia  
8 6 Turimumahoro<sup>2</sup>, Diana Babirye<sup>2</sup>, Denis Oyuku<sup>2</sup>, Christopher Berger<sup>1</sup>, Austin Tucker<sup>4</sup>, Devika  
9 7 Patel<sup>5</sup>, Amanda Sammann<sup>5</sup>, David Dowdy<sup>2,4</sup>, Turyahabwe Stavia<sup>6</sup>, Adithya Cattamanchi<sup>1,2</sup>,  
10 8 Achilles Katamba<sup>2,3</sup>

11 9 \* Authors contributed equally

12 10  
13 11 Affiliations:

- 14 12 1. Curry International Tuberculosis Center and Division of Pulmonary and Critical Care  
15 13 Medicine, Zuckerberg San Francisco General Hospital, University of California San  
16 14 Francisco, San Francisco, CA, USA
- 17 15 2. Uganda Tuberculosis Implementation Research Consortium, Kampala, Uganda
- 18 16 3. School of Public Health, Makerere University College of Health Sciences, Kampala,  
19 17 Uganda
- 20 18 4. Department of Epidemiology, Johns Hopkins Bloomberg School of Public Health,  
21 19 Baltimore, MD, USA
- 22 20 5. The Better Lab, Department of Surgery, Zuckerberg San Francisco General Hospital,  
23 21 University of California San Francisco, San Francisco, CA, USA
- 24 22 6. National Tuberculosis and Leprosy Program, Uganda Ministry of Health, Kampala,  
25 23 Uganda

26 24  
27 25 Correspondence to:

28 26 Achilles Katamba  
29 27 [axk95@case.edu](mailto:axk95@case.edu)  
30 28 Makerere University College of Health Sciences,  
31 29 Clinical Epidemiology and Biostatistics Unit  
32 30 Mulago Hill Road  
33 31 Clinical Research Building Floor 3 Room 3.1  
34 32 Kampala, Uganda 21696  
35 33 +256-772-575-038

36 34  
37 35 Abstract word count: 264

38 36 Manuscript word count (excluding tables and figures): 4,281

1  
2  
3 **37 ABSTRACT**  
4

5 **38 Introduction:** Low-cost digital adherence technologies (DAT) such as 99DOTS have emerged as  
6  
7 **39** an alternative to directly observed therapy, (DOT), the current standard for TB treatment  
8  
9 **40** supervision. However, there are limited data to support DAT scale-up. The “DOT to DAT” trial  
10  
11 **41** aims to evaluate the effectiveness and implementation of a 99DOTS-based TB treatment  
12  
13 **42** supervision strategy.

14  
15 **43 Methods and analysis:** This is a pragmatic, stepped-wedge cluster randomized trial, with hybrid  
16  
17 **44** type 2 effectiveness-implementation design. The trial will include all adults (estimated N=1890)  
18  
19 **45** treated for drug-susceptible pulmonary TB over an 8-month period at 18 TB treatment units in  
20  
21 **46** Uganda. Three sites per month will switch from routine care (DOT) to the intervention (99DOTS-  
22  
23 **47** based treatment supervision) beginning in Month 2, with the order determined randomly. 99DOTS  
24  
25 **48** enables patients to be monitored while self-administering TB medicines. Patients receive daily  
26  
27 **49** automated SMS dosing reminders and confirm dosing by calling toll-free numbers. The primary  
28  
29 **50** effectiveness outcome is the proportion of patients completing TB treatment. With 18 clusters  
30  
31 **51** randomized into 6 steps and an average cluster size of 15 patients per month, the study will have  
32  
33 **52** 89% power to detect a 10% or greater increase in treatment completion between the routine care  
34  
35 **53** and intervention periods. Secondary outcomes include more proximal effectiveness measures as  
36  
37 **54** well as quantitative and qualitative assessments of the reach, adoption and implementation of the  
38  
39 **55** intervention.

40  
41 **56 Ethics and dissemination:** Ethics approval was granted by institutional review boards at  
42  
43 **57** Makerere University School of Public Health and the University of California San Francisco.  
44  
45 **58** Findings will be disseminated through peer-reviewed publications, presentations at scientific  
46  
47 **59** conferences and presentations to key stakeholders.  
48

49  
50  
51 **60**  
52  
53 **61 Trial registration number:** PACTR201808609844917  
54  
55  
56  
57  
58  
59  
60

## 62 STRENGTHS AND LIMITATIONS OF THIS STUDY

- 63 • This is the first randomized trial to evaluate a 99DOTS-based strategy for TB treatment  
64 supervision.
- 65 • The intervention was designed using the PRECEDE framework and adapted for local  
66 context in Uganda using human-centered design.
- 67 • Trial outcomes were selected using the RE-AIM framework.
- 68 • The intervention was implemented by health facility staff and will be assessed using  
69 routinely collected data to approximate the real-world impact of this intervention.

## 71 INTRODUCTION

72 Tuberculosis (TB) is the leading infectious cause of death worldwide despite being a preventable  
73 and curable disease.(1) Poor adherence to medication continues to be a major obstacle to TB  
74 elimination, resulting in prolonged infectiousness, emergence of multidrug resistance, and  
75 increased risk of poor treatment outcomes. The World Health Organization (WHO)-recommended  
76 strategy, directly observed therapy short-course (DOTS), has been the standard-of-care for TB  
77 treatment supervision since the 1990s. As part of this strategy, a health worker is expected to  
78 observe patients swallow each dose of anti-TB medication. However, directly observed therapy  
79 (DOT) is time-consuming, costly and inconvenient for both patients and providers, while its  
80 implementation is also difficult to monitor.(2, 3) Not surprisingly, TB treatment success rates  
81 remain below the 90% target in most high-burden countries, despite reported DOT coverage over  
82 90%.(1)

83  
84 With the increase in mobile phone penetration among patients and healthcare workers in high TB  
85 burden countries,(4) digital adherence technologies (DATs) could address some of the challenges  
86 associated with implementation of the DOTS strategy in a patient-centered manner. To date, such  
87 technologies have received only a conditional recommendation by the WHO due to very low  
88 quality of evidence.(5) The first randomized trial of a DAT found that SMS reminders alone did  
89 not improve medication adherence, but a medication event reminder monitor did.(6) However,  
90 treatment outcomes did not improve and both trials and programmatic research have shown  
91 variable uptake of DAT.(7-10)

1  
2  
3 92  
4  
5  
6 93 The “DOT to DAT” trial aims to evaluate the effectiveness, implementation and cost-effectiveness  
7 94 of a culturally and contextually adapted version of 99DOTS in Uganda. 99DOTS is a low-cost  
8  
9 95 DAT wherein patients self-report medication adherence by calling toll-free phone numbers hidden  
10  
11 96 underneath pills in blister packs.(11) We present the research methods used for the first  
12  
13 97 randomized trial to evaluate the effectiveness and implementation of a 99DOTS-based strategy for  
14  
15 98 TB treatment supervision in routine care settings.

16 99  
17  
18 100 **Conceptual basis for trial design**  
19  
20 101 Numerous conceptual frameworks have emerged to improve the implementation and success of  
21  
22 102 health interventions through theory-based design and evaluation. The PRECEDE framework(12)  
23  
24 103 guided the development of the 99DOTS-based intervention strategy, while the RE-AIM  
25  
26 104 framework guided its comprehensive evaluation. Behavior change models including the  
27  
28 105 Theoretical Domains Framework (TDF)(13, 14) and the Unified Theory of Acceptance and Use  
29  
30 106 of Technology (UTAUT)(15, 16) guided the assessment and analysis of patient- and provider-level  
31  
32 107 barriers to adoption and implementation of 99DOTS.

33  
34 109 The PRECEDE framework emphasizes the need for multi-faceted health promotion interventions  
35  
36 110 to address predisposing, enabling, and reinforcing factors in order to achieve behavior change.(12)  
37  
38 111 The 99DOTS-based intervention was designed to address key predisposing (social isolation and  
39  
40 112 the high direct and indirect cost of clinic visits), enabling (inability of health facility staff to focus  
41  
42 113 limited time and resources on non-adherent patients), and reinforcing (a lack of real-time  
43  
44 114 information on patient adherence to medications) factors related to TB treatment adherence  
45  
46 115 identified through the literature and formative human factors research that preceded the trial.(11)

47  
48 117 The RE-AIM framework was designed to ensure that trials not only assess the effect of  
49  
50 118 interventions but also their translatability and public health impact.(17, 18) This hybrid type 2 trial  
51  
52 119 therefore focuses on the effectiveness of the 99DOTS-based intervention in improving TB  
53  
54 120 treatment outcomes, but concurrently examines its reach into the target population, adoption by  
55  
56 121 target settings and staff, and implementation fidelity and costs.(19) The goal of assessing

1  
2  
3 122 translatability and public health impact is further enhanced through pragmatic design choices for  
4 123 each element of the trial in order to maximize applicability in real-world settings.(20)  
5  
6  
7 124

## 8 125 **METHODS AND ANALYSIS**

### 9 126 **Study aims**

10 127 The primary aim of the trial is to determine whether a 99DOTS-based strategy increases the  
11  
12 128 proportion of patients who complete TB treatment in comparison to routine care. Secondary aims  
13  
14 129 include 1) comparing short-term treatment outcomes and loss to follow-up between the  
15  
16 130 intervention and routine care arms; 2) assessing the reach, adoption and implementation of the  
17  
18 131 99DOTS-based strategy; and 3) evaluating the incremental costs and cost-effectiveness of the  
19  
20 132 99DOTS-based strategy as compared to routine care from the health system perspective. Our  
21  
22 133 primary hypothesis is that 99DOTS-based TB treatment supervision will improve TB treatment  
23  
24 134 outcomes. Our secondary hypotheses are that the 99DOTS-based strategy will have high uptake  
25  
26 135 among patients and providers, and be cost-effective.  
27  
28 136

### 29 137 **Study design**

30  
31 138 This is a pragmatic, stepped-wedge randomized trial, with a hybrid type 2 implementation-  
32  
33 139 effectiveness design.(19) We included repeated cross-sectional samples of eligible individuals  
34  
35 140 initiating TB treatment at participating health facilities at 8 time points (months). Patient outcomes  
36  
37 141 were assigned to the health facility and month in which they initiated treatment. As depicted in  
38  
39 142 **Figure 1**, the intervention strategy was sequentially introduced at 3 sites each in Months 2-6, with  
40  
41 143 all sites under routine care in Month 1 and all sites using the intervention strategy in Month 8.  
42  
43 144 Following implementation of the intervention at each site, health facility staff were instructed to  
44  
45 145 offer 99DOTS to all new eligible patients initiating treatment and to continue supervising patients  
46  
47 146 already on treatment using routine care. The month of switch from control to intervention (buffer  
48  
49 147 period) will be excluded from analysis. We chose the stepped-wedge trial design to maximize  
50  
51 148 equity and acceptability (all sites will receive the intervention), minimize logistical constraints  
52  
53 149 associated with introducing the intervention simultaneously at a large number of sites, account for  
54  
55 150 secular outcome trends, and allow for iterative learning and changes in intervention roll-out as  
56  
57 151 would occur during eventual scale-up. We chose a highly pragmatic approach to trial  
58  
59  
60

1  
2  
3 152 implementation, as described in sections below, to understand the real-world impact of the  
4  
5 153 99DOTS-based intervention strategy.

6  
7 154

## 8 155 **Study Setting**

9  
10 156 The trial is being conducted at 18 TB treatment units within hospitals and health centers across 15  
11  
12 157 districts of Uganda. The TB treatment units are affiliated with the Uganda National Tuberculosis  
13  
14 158 and Leprosy Program (NTLP) and provide TB treatment free of charge using a mix of facility- and  
15  
16 159 community-based DOTS. Uganda was chosen as the trial setting due to its high TB burden (200  
17  
18 160 cases/100,000 in 2018) and low treatment success rate (72% in 2017).(1) Previous studies have  
19  
20 161 found 69-75% of TB patients in Uganda have access to a phone.(21, 22)

21 162  
22 163 Study sites were selected after reviewing 2016 TB treatment outcomes and 2017 TB case finding  
23  
24 164 data reported to the NTLP from all 1514 registered TB treatment units. We included treatment  
25  
26 165 units that 1) diagnosed >10 pulmonary TB patients/month in 2017, 2) were not located within  
27  
28 166 Kampala District (many active ongoing projects in this district), 3) were located within 225 km of  
29  
30 167 Kampala City (for feasibility), and 4) had a pulmonary TB treatment success rate in 2016 <80%  
31  
32 168 (to be able to show an impact).

33 169  
34 170 Of the 1514 treatment units registered with the Uganda NTLP, 23 treatment units met our inclusion  
35  
36 171 criteria (**Figure 2**). The majority (n=1435) diagnosed fewer than 10 TB patients/month in 2017,  
37  
38 172 17 are located within Kampala district, 31 are not within 225 km of Kampala district, and 9 had a  
39  
40 173 treatment success rate >80% in 2016. Of the 23 remaining treatment units, we selected 18 located  
41  
42 174 in 15 districts (10 in Central, 7 in Eastern and 1 in Western Uganda) in consultation with the NTLP.  
43  
44 175 Project staff visited the Chief Administrative Officers, District Health Officers and Facility  
45  
46 176 Directors for the 18 sites to discuss the study. All signed a memorandum of agreement for their  
47  
48 177 site to participate in the study.

48 178

## 49 179 **Study participants**

50 180 All adult patients treated for drug-susceptible pulmonary TB at participating treatment units during  
51  
52 181 the study period will be eligible for inclusion. Children, patients treated for drug-resistant or  
53  
54 182 extrapulmonary TB, and patients transferred to another facility to complete treatment will be

1  
2  
3 183 excluded. To be enrolled on 99DOTS, a patient must also have access to a phone. Surveys to assess  
4 184 99DOTS implementation will be conducted in a random subset of eligible patients and all health  
5 185 workers involved in TB treatment supervision at each treatment unit. Time-and-motion studies to  
6 186 assess costs will also be conducted among health workers involved in TB treatment supervision at  
7 187 each treatment unit.  
8  
9  
10  
11  
12 188

### 13 189 **Routine care and intervention strategies**

15 190 *Routine care.* The conventional approach to TB treatment supervision in Uganda is a mix of  
16 191 community- and facility-based DOT, as per NTLP guidelines. At the time of treatment initiation,  
17 192 treatment unit staff record patient demographic and clinical details in the NTLP register and are  
18 193 supposed to provide TB-focused counseling. Most TB patients are treated using community-based  
19 194 DOT, wherein they name a treatment supporter, a family member or non-family community  
20 195 member, and are provided with a 2-week supply of medicines in the first two months (intensive  
21 196 phase) and a one-month supply of medicines in the next four months (continuation phase) of TB  
22 197 treatment. Patients take their medicines from home (with or without observation by a treatment  
23 198 supporter) and return to the health facility for medication refills. At each refill visit, health facility  
24 199 staff are supposed to assess adherence via patient self-report and provide additional counseling.  
25 200 Health facility staff are also supposed to call or visit patients who do not return for refills, but  
26 201 patient follow-up is limited across health facilities.  
27  
28  
29  
30  
31  
32  
33  
34  
35  
36 202

37 203 *Intervention.* The 99DOTS-based intervention strategy is comprised of four main components that  
38 204 address distinct barriers to successful TB treatment (**Table 1**):

- 41 205 1) Daily automated SMS dosing reminders
- 42 206 2) Daily dosing confirmation using toll-free phone calls
- 43 207 3) Weekly automated interactive voice response (IVR) check-in phone calls
- 44 208 4) Differential management protocol based on dosing history and response to IVR check-in

45 209  
46 210 **Table 1. Components of the “DOT to DAT” trial intervention and corresponding barriers**  
47 211 **addressed.**  
48 212

| Component | Barrier addressed |
|-----------|-------------------|
|-----------|-------------------|



|   |                                                            |                                                                                                                                                                                         |
|---|------------------------------------------------------------|-----------------------------------------------------------------------------------------------------------------------------------------------------------------------------------------|
| 1 | Daily dosing reminders via automated SMS                   | Addresses high cost of clinic visits for patients and assists with memory and planning processes known to be importance to adherence.                                                   |
| 2 | Daily dosing confirmation via toll-free phone calls        | Addresses high cost of clinic visits for patients, lack of real-time information for providers on patient adherence to medications.                                                     |
| 3 | Weekly check-in via interactive voice response phone calls | Addresses lack of social support and feeling of isolation during TB treatment; shown to be effective in other contexts at increasing connection with CHW and reducing social isolation. |
| 4 | Differential management protocol                           | Addresses limited time and resources among TB treatment unit staff and the need to focus on non-adherent patients.                                                                      |

213  
214 Formative research using human-centered design was used to adapt the generic 99DOTS product  
215 to the local context, including changes to the envelope design and addition of a rotating series of  
216 educational/motivational audio messages heard when patients call in to report dosing (details of  
217 the formative research will be reported in a separate publication) (**Figure 3**).

218  
219 TB treatment unit staff will be requested to offer 99DOTS-based treatment supervision to all  
220 eligible patients initiating TB treatment, and to register patients who accept 99DOTS-based  
221 treatment supervision on the 99DOTS platform via a mobile app. Given the pragmatic nature of  
222 the trial, the decision to offer and accept 99DOTS-based treatment supervision will be made by  
223 treatment unit staff and patients, respectively. Once registered, treatment unit staff will instruct  
224 patients on how to use the 99DOTS pill pack and make a call to the 99DOTS system using the  
225 toll-free number revealed when pills are pushed out of the medication blister pack (**Figure 3**). Staff  
226 will also help patients personalize their 99DOTS pill pack by choosing a decorative cover,  
227 educational or motivational sticker for the inside flap, writing in their health worker's contact  
228 information, and selecting a time of day to take their medication (**Figure 3**).

229  
230 When patients call to confirm dosing, they hear a recorded educational or motivational message  
231 about continuing and completing TB treatment. Each dose confirmed via phone call is logged by  
232 99DOTS and reflected on the 99DOTS smartphone app dashboard, viewable by treatment unit  
233 staff. During routine drug refill visits (same schedule as described for routine care period), health

234 facility staff are asked to review adherence data in the 99DOTS app before providing counseling.  
235 At the conclusion of the intensive phase of treatment, patients with adherence >90% are offered  
236 the option of returning back to the health facility after two months instead of the standard one  
237 month.

238  
239 Health facilities using 99DOTS to manage TB patient treatment will be provided one smartphone  
240 per facility, minimal funds to cover cell phone data, and an average of 300,000 US\$ (approximately  
241 \$82 USD) per month to facilitate patient follow-up. Treatment unit staff will not be provided any  
242 extra compensation to reflect future conditions under eventual scale-up.

### 243 244 **Implementation considerations**

245 99DOTS training will occur at each health facility during the month in which it is scheduled to  
246 switch to the intervention. Project staff and the District TB Officer will conduct a 2-3 day training  
247 jointly at each health facility using standardized training materials. Treatment unit staff will be  
248 trained on how to register patients on the 99DOTS platform via a smartphone app, counsel patients  
249 regarding use of 99DOTS, use the 99DOTS application to review dosing history, and conduct  
250 differential management based on dosing history and response to weekly check-ins. Mentored  
251 patient enrollment on 99DOTS will be conducted as part of the training.

252  
253 During the trial, treatment unit staff will make all decisions regarding management of TB patients  
254 in both the routine care and intervention periods. Research staff will not be onsite after training  
255 with the exception of 2-3 day quarterly site visits to resolve data cleaning queries and implement  
256 surveys and health economic sub-studies. Thus, the implementation is highly pragmatic and meant  
257 to approximate how 99DOTS would be used at treatment units in the absence of a research study.

### 258 259 **Randomization**

260 The 18 health facilities will be randomly assigned to one of the six allocation sequences (**Figure**  
261 **1**) using a simple, unrestricted two-stage process. This process will occur by simple drawing during  
262 a public randomization ceremony held in Kampala, Uganda. A representative from each TB  
263 treatment unit, district health officers, and Uganda NTLP staff will be invited to attend the  
264 ceremony. First, health facilities (*i.e.*, clusters) will be randomly assigned into six blocks of three

1  
2  
3 265 by having health facility representatives each draw 1 of 18 balls (3 each labeled A-F) from an  
4  
5 266 opaque bag. Blocks will then be randomly assigned to an intervention initiation time, which will  
6  
7 267 occur at equally spaced one-month intervals during the trial, by drawing of 6 balls labeled 1-6 from  
8  
9 268 an opaque bag.

10 269

## 11 270 **Blinding**

12 271 Blinding of the assigned intervention is not feasible given intervention implementation at the  
13  
14 272 health facility level. Where possible, the investigators and study staff, with the exception of the  
15  
16 273 statistician and data manager, will be blinded to aggregate TB outcomes by study period.

17 274

## 18 275 **Data collection and management**

### 19 276 *Patient-level data collection*

20  
21  
22 277 Consistent with the pragmatic design, TB treatment outcomes will be assessed by extracting data  
23  
24 278 on all eligible patients from routine Uganda NTLP TB treatment registers used at all treatment  
25  
26 279 units. Project staff will train two health workers at each site (one primary, one backup) identified  
27  
28 280 by the health facility director to take photos of the register every 2-4 weeks for the duration of the  
29  
30 281 project using a camera-enabled smartphone, and to upload the photos to a central secure, password-  
31  
32 282 protected server, only accessible to staff. Health workers will be trained to delete photos from the  
33  
34 283 phone after upload confirmation. Completeness of TB treatment registers will be assessed, and at  
35  
36 284 quarterly site visits, study staff will provide re-training as needed and resolve data cleaning queries.  
37  
38 285 Study staff will extract data from photos of TB registers and enter data into a secure database use  
39  
40 286 Research Electronic Data Capture software (REDCap).(23) Data queries for missing or  
41  
42 287 nonsensical data will be reviewed with treatment unit staff at quarterly site visits.

43 288

### 44 289 *99DOTS process metrics data collection*

45  
46 290 During the intervention period at each site, process metric data to assess the implementation of  
47  
48 291 each component of the intervention strategy will be extracted from the 99DOTS server. The server  
49  
50 292 logs all calls made by patients to confirm dosing and doses entered manually by providers, all SMS  
51  
52 293 messages sent to patients, and all IVR calls sent to patients and their responses.

53 294

### 54 295 *Qualitative data collection*

1  
2  
3 296 Surveys will be conducted with 10 randomly selected eligible patients enrolled on 99DOTS (5  
4 297 women and 5 men) and 1-2 eligible providers per site (180 total patients, 18-36 total providers)  
5 298 beginning in Month 10 of the trial to assess the acceptability of the 99DOTS-based intervention  
6 299 strategy. Research staff will contact selected patients by phone to review the verbal consent script,  
7 300 answer questions the patient may have, and administer the survey to consenting patients. Provider  
8 301 surveys and interviews will be conducted during quarterly site visits beginning in Month 13 of the  
9 302 trial to assess factors influencing the adoption and implementation of 99DOTS.  
10  
11  
12  
13  
14  
15

16 303  
17 304 *Health system cost data collection*

18 305 Costing and cost-effectiveness analyses will focus on the health system perspective. Treatment  
19 306 unit staff at each site will be interviewed to gain a more complete understanding of the activities  
20 307 and staff involved in the operations of 99DOTS. Time-and-motion studies of health workers  
21 308 (anticipated to be 3-6 health workers per site, depending on the number of staff involved in  
22 309 delivering 99DOTS) will be carried out at six clinics, sampled to ensure good representation of  
23 310 clinic volume and geography. These time-and-motion studies will be performed on a quarterly  
24 311 basis in conjunction with site visits and will consist of direct observation of all activities conducted  
25 312 by treatment unit staff over the corresponding 1-2 day evaluation period, for a total 6-12 days of  
26 313 observation every three months over the course of the 14-month study period. During these  
27 314 observation periods, the time and resources required to perform all activities related to TB  
28 315 treatment (e.g., medication preparation, contacting patients, observing medication doses, etc.) will  
29 316 be recorded. Additional costing data will be collected to assess the cost of implementing and  
30 317 maintaining 99DOTS technical assistance (budget records from Everwell Health Solutions, the  
31 318 creator of 99DOTS) and the cost at point of care (surveys of project staff to track resource use  
32 319 during trainings). Overhead costs will be estimated using an ingredients approach, incorporating  
33 320 the cost of supplies, building/space, vehicles, and human resources with incorporation of recurrent  
34 321 costs such as security, vehicle maintenance costs, and all supplies (medical and administrative).  
35  
36  
37  
38  
39  
40  
41  
42  
43  
44  
45  
46  
47  
48  
49

50 323 **Outcomes**

51 324 Trial outcomes were selected in accordance with the RE-AIM evaluation framework (**Table 2**).  
52 325 The primary effectiveness outcome is the proportion of patients who complete TB treatment,  
53 326 defined as having an outcome of “cured” or “treatment completed” recorded in the unit TB  
54  
55  
56  
57  
58  
59  
60

327 treatment register. Secondary effectiveness outcomes include the proportion who persist on  
 328 treatment through the intensive phase (*i.e.*, 56 days of treatment), the proportion lost to follow-up  
 329 and estimated number of incremental disability-adjusted life years (DALYs) averted. Reach is  
 330 defined as the proportion of eligible patients enrolled on 99DOTS. Adoption metrics include the  
 331 proportion of scheduled doses confirmed by patient phone calls and the proportion of weekly IVR  
 332 check-in calls to which patients send a response. Implementation outcomes include delivery of the  
 333 intervention (proportions of daily SMS dosing reminders and weekly IVR check-in calls sent by  
 334 the 99DOTS platform and received on patient handsets), acceptability (as assessed by patient and  
 335 health worker surveys and interviews) and incremental costs of the 99DOTS-based intervention  
 336 strategy.

337

338 **Table 2.** Outcome definitions and data source by RE-AIM dimension.

| Outcome type          | Outcome                                                          | Data Source                                    |
|-----------------------|------------------------------------------------------------------|------------------------------------------------|
| <b>Reach</b>          |                                                                  |                                                |
|                       | Proportion enrolled on 99DOTS                                    | 99DOTS server,<br>Treatment register           |
| <b>Effectiveness</b>  |                                                                  |                                                |
| Primary               | Proportion treated successfully                                  | Treatment register                             |
| Secondary             | Proportion with persistence                                      | Treatment register                             |
| Secondary             | Proportion lost to follow-up                                     | Treatment register                             |
| Secondary             | Incremental cost per patient treated successfully                | Time and motion surveys;<br>budgetary analysis |
| <b>Adoption</b>       |                                                                  |                                                |
|                       | Proportion of scheduled doses confirmed by phone call            | 99DOTS server                                  |
|                       | Proportion of weekly IVR calls to which patients send a response | 99DOTS server                                  |
| <b>Implementation</b> |                                                                  |                                                |
|                       | Proportion of daily SMS sent by 99DOTS platform                  | 99DOTS server                                  |
|                       | Proportion of daily SMS received on patient handset              | 99DOTS server                                  |
|                       | Proportion of weekly IVR calls sent by 99DOTS platform           | 99DOTS server                                  |
|                       | Proportion of weekly IVR calls received on patient handset       | 99DOTS server                                  |

339

340 *Power and sample size*

1  
2  
3 341 The trial aims to demonstrate the superiority of the 99DOTS-based strategy. The sample size was  
4  
5 342 calculated for the primary effectiveness outcome, proportion of patients treated successfully, using  
6  
7 343 formulae appropriate for stepped-wedge trials. A type I error of 5% and power of at least 90% is  
8  
9 344 assumed. Based on 2017 data, the harmonic mean number of patients initiating treatment for drug-  
10  
11 345 susceptible pulmonary TB per month across participating treatment units was 15. Thus, we  
12  
13 346 anticipate that approximately 1890 patients will initiate treatment over the 8-month enrollment  
14  
15 347 period (945 in the pre- and 945 in the post-implementation phases across treatment units). The trial  
16  
17 348 will have 89% power to demonstrate that our strategy increases the proportion of patients treated  
18  
19 349 successfully by 10% or more (assumptions:  $\alpha=0.05$ ; intraclass correlation coefficient, ICC =  
20  
21 350 0.001 calculated using 2017 NTLTP data for the 18 treatment units; pre-implementation treatment  
22  
23 351 success = 51% based on 2017 NTLTP data for the 18 treatment units; calculations performed using  
24  
25 352 steppedwedge command in Stata 14).

353

### 354 **Analysis**

355 The primary effectiveness analysis will be conducted at the health facility level using multivariable  
356 mixed effect logit models with random effects for site and fixed effects for trial period, time, and  
357 confounders (using Stata's `melogit` and `meqrlogit` commands). Analysis will be done for intention  
358 to treat and per protocol (excluding patients who are not enrolled on 99DOTS during the  
359 intervention period at each site) populations. Models will adjust for the longitudinal design  
360 (indicator variable for each trial month) and clustering by site (random effect for health facility).  
361 Patients initiating treatment during the month in which sites switch from routine treatment  
362 supervision to the intervention strategy will be excluded (buffer period). Potential confounders,  
363 selected *a priori*, including sex, HIV status, disease class (bacteriologically confirmed vs.  
364 clinically diagnosed), and TB type (new vs. retreatment), will be included in the model as fixed  
365 effects. Secondary effectiveness outcomes (**Table 2**) will be analyzed in the same manner.  
366 Subgroup analyses will stratify by gender, HIV status, and health facility. Sensitivity analyses will  
367 be performed to assess the robustness of our findings with respect to treatment outcomes for  
368 patients lost to follow up, the staged intervention roll out, intervention timing and buffer period,  
369 and analysis method.

370

1  
2  
3 371 Quantitative reach, adoption and implementation outcomes will be summarized descriptively.  
4  
5 372 Comparative analyses will identify factors independently associated with reach, adoption and  
6  
7 373 implementation of intervention components. Health economic data will be used to calculate the  
8  
9 374 incremental cost-effectiveness of the intervention strategy from a health system perspective,  
10  
11 375 measured as the incremental cost per successfully completed treatment, comparing 99DOTS  
12 376 relative to routine care.

13  
14 377

### 15 378 **Ethics and dissemination**

16  
17 379 Patients can choose to use or not use 99DOTS at any time during the intervention period. 99DOTS  
18  
19 380 enables closer patient monitoring than routine TB treatment supervision, but loss of patient privacy  
20  
21 381 is a potential concern. Data on this are being collected through patient surveys. Because of the  
22  
23 382 low-risk nature of the research, the Principal Investigators will be responsible for monitoring the  
24  
25 383 data, assuring protocol compliance, and conducting safety reviews on a quarterly basis. External  
26  
27 384 monitoring is provided by a Stop TB Partnership project officer and Monitoring and Evaluation  
28  
29 385 consultant. The Principal Investigator will submit regular progress reports, including  
30  
31 386 recommendations on whether the project should continue unchanged, require modification, or  
32  
33 387 close to enrollment.

34  
35 388

36 389 Ethics approval was granted by institutional review boards at Makerere University School of  
37  
38 390 Public Health and the University of California San Francisco. To ensure that the study captures all  
39  
40 391 eligible adults initiating treatment at study sites, a waiver of informed consent was granted to  
41  
42 392 access routine TB treatment data recorded in standard NTLR registers, such that research staff will  
43  
44 393 not be required to be onsite to enroll and consent patients. The protocol was registered with the  
45  
46 394 Pan-African Clinical Trials Registry (PACTR201808609844917) on 31 August 2018, updated 7  
47  
48 395 November 2019 and complies with reporting guidelines outlined in the stepped-wedge trial  
49  
50 396 extension of the Consolidated Standards of Reporting Trials.(24) Any major changes in protocol  
51  
52 397 will be approved by the Stop TB Partnership project officer and both ethics committees and  
53  
54 398 registered with the PACTR. The full protocol and statistical code will be made available upon  
55  
56 399 request.

57  
58  
59 400

1  
2  
3 401 Findings will be disseminated through peer-reviewed publications, presentations at scientific  
4 402 conferences and presentations to key stakeholders. Drs. Cattamanchi, Katamba and Kiwanuka will  
5 403 have access to the final dataset; the participant-level dataset will be made available to other  
6 404 investigators who have IRB approval to analyze the data.  
7  
8  
9

10 405

### 11 406 **Patient and public involvement**

12 407 Patients and members of the public were involved throughout the research process. The NTLP was  
13 408 involved in identifying health facilities to participate, selecting study design, and conducting  
14 409 research through partnership with District Health Officers and participating health facilities.  
15 410 Patients, health workers, and community members were involved in intervention design through a  
16 411 human-centered design process, which included several rounds of focus groups and interviews  
17 412 with stakeholders. Health workers at the 18 health facilities implemented 99DOTS without  
18 413 research staff present and assisted in data collection by completing routine TB treatment registers  
19 414 and sending photos of the register to the research team through secure means.  
20  
21  
22  
23  
24  
25  
26  
27  
28

29 415

### 30 416 **DISCUSSION**

31 417 99DOTS is a low-cost DAT that has the potential to improve TB treatment outcomes and the  
32 418 patient experience of TB treatment in Uganda and other high-burden settings. Here, we describe  
33 419 the first randomized trial designed to evaluate the effectiveness of a 99DOTS-based TB treatment  
34 420 supervision strategy as part of routine care in a high burden setting. Other novel aspects of the trial  
35 421 include our use of human-centered design to adapt 99DOTS to the local context with the goal of  
36 422 increasing patient engagement with the technology, the use of theory and implementation science  
37 423 frameworks to guide intervention design and evaluation, and our focus on simultaneously  
38 424 assessing implementation and costs to guide scale-up decisions.  
39  
40  
41  
42  
43  
44  
45

46 425

47 426 Many aspects of this trial are intentionally pragmatic to ensure the outcomes reflect what can be  
48 427 expected under non-research conditions.<sup>(25)</sup> The study population will include all patients with  
49 428 drug susceptible pulmonary TB, with the exception of children. A waiver of consent was obtained  
50 429 for patient-level data collection such that research staff will not be required to be onsite to enroll  
51 430 and consent patients. Primary and key secondary outcomes will be assessed using routine data  
52 431 available through NTLP registers and the 99DOTS platform, with focused additional data  
53  
54  
55  
56  
57  
58  
59



1  
2  
3 432 collection for implementation and cost outcomes. The intervention will be implemented by routine  
4  
5 433 TB treatment unit staff, who also will make all decisions to offer 99DOTS-based treatment  
6  
7 434 supervision to patients. At the same time, the stepped-wedge randomized trial design provides a  
8  
9 435 rigorous assessment of intervention effect. Limitations of such a pragmatic trial design include less  
10  
11 436 control over intervention delivery and potential limited uptake of the intervention given the wide  
12  
13 437 inclusion criteria (all adults initiating treatment for drug-susceptible pulmonary TB). In order to  
14  
15 438 enroll enough patients to assess the effectiveness of the 99DOTS-based intervention, we selected  
16  
17 439 facilities that treat larger numbers of TB patients. Uptake and effectiveness of 99DOTS may be  
18  
19 440 different at lower volume health centers.

20  
21 441  
22 442 In summary, this pragmatic, hybrid type 2 effectiveness-implementation trial is well poised to  
23  
24 443 assess both the effectiveness of an adapted 99DOTS-based intervention and potential barriers and  
25  
26 444 facilitators to its scale-up if successful. The design and implementation of this trial intend to  
27  
28 445 generate results to inform decisions on whether and how to implement 99DOTS in Uganda and  
29  
30 446 other high burden countries.

31  
32  
33  
34  
35  
36  
37  
38  
39  
40  
41  
42  
43  
44  
45  
46  
47  
48  
49  
50  
51  
52  
53  
54  
55  
56  
57  
58  
59  
60

**References**

1. World Health Organization. Global Tuberculosis Report. 2019.
2. Izudi J, Tamwesigire IK, Bajunirwe F. Explaining the successes and failures of tuberculosis treatment programs; a tale of two regions in rural eastern Uganda. *BMC Health Services Research*. 2019;19(1):979.
3. Fiseha D, Demissie M. Assessment of Directly Observed Therapy (DOT) following tuberculosis regimen change in Addis Ababa, Ethiopia: a qualitative study. *BMC Infect Dis*. 2015;15:405.
4. GSMA Intelligence. The Mobile Economy - Africa London: GSMA; 2016 [Available from: <https://www.gsma.com/mobileeconomy/africa/>].
5. World Health Organization. Treatment of tuberculosis: guidelines for treatment of drug-susceptible tuberculosis and patient care (2017 update). Geneva; 2017.
6. Liu X, Lewis JJ, Zhang H, Lu W, Zhang S, Zheng G, et al. Effectiveness of Electronic Reminders to Improve Medication Adherence in Tuberculosis Patients: A Cluster-Randomised Trial. *PLoS medicine*. 2015;12(9):e1001876-e.
7. Subbaraman R, de Mondesert L, Musiimenta A, Pai M, Mayer KH, Thomas BE, et al. Digital adherence technologies for the management of tuberculosis therapy: mapping the landscape and research priorities. *BMJ Glob Health*. 2018;3(5):e001018.
8. Liu X, Lewis JJ, Zhang H, Lu W, Zhang S, Zheng G, et al. Effectiveness of Electronic Reminders to Improve Medication Adherence in Tuberculosis Patients: A Cluster-Randomised Trial. *PLoS Med*. 2015;12(9):e1001876.
9. Liu X, Blaschke T, Thomas B, De Geest S, Jiang S, Gao Y, et al. Usability of a Medication Event Reminder Monitor System (MERM) by Providers and Patients to Improve Adherence in the Management of Tuberculosis. *Int J Environ Res Public Health*. 2017;14(10).
10. Thakkar D, Piparva KG, Lakkad SG. A pilot project: 99DOTS information communication technology-based approach for tuberculosis treatment in Rajkot district. *Lung India*. 2019;36(2):108-11.
11. Cross A, Gupta N, Liu B, Nair V, Kumar A, Kuttan R, et al. 99DOTS: A Low-Cost Approach to Monitoring and Improving Medication Adherence. Tenth International Conference on Information and Communication Technologies and Development. ICTD. 2019.
12. Green LW, Kreuter MW. Health promotion planning: An educational and ecological approach: McGraw-Hill; 1993.
13. Atkins L, Francis J, Islam R, O'Connor D, Patey A, Ivers N, et al. A guide to using the Theoretical Domains Framework of behaviour change to investigate implementation problems. *Implement Sci*. 2017;12(1):77.
14. French SD, Green SE, O'Connor DA, McKenzie JE, Francis JJ, Michie S, et al. Developing theory-informed behaviour change interventions to implement evidence into practice: a systematic approach using the Theoretical Domains Framework. *Implement Sci*. 2012;7:38.
15. Sarfaraz J. Unified theory of acceptance and use of technology (Utaut) model-mobile banking. *Journal of Internet Banking and Commerce*. 2017;22(3):1-20.
16. Venkatesh V, Thong JY, Xu X. Consumer acceptance and use of information technology: extending the unified theory of acceptance and use of technology. *MIS quarterly*. 2012:157-78.

- 1  
2  
3 492 17. Glasgow RE, Vogt TM, Boles SM. Evaluating the public health impact of health  
4 493 promotion interventions: the RE-AIM framework. *American journal of public health.*  
5 494 1999;89(9):1322-7.
- 6 495 18. Gaglio B, Shoup JA, Glasgow RE. The RE-AIM framework: a systematic review of use  
7 496 over time. *American journal of public health.* 2013;103(6):e38-e46.
- 8 497 19. Curran GM, Bauer M, Mittman B, Pyne JM, Stetler C. Effectiveness-implementation  
9 498 hybrid designs: combining elements of clinical effectiveness and implementation research to  
10 499 enhance public health impact. *Med Care.* 2012;50(3):217-26.
- 11 500 20. Loudon K, Treweek S, Sullivan F, Donnan P, Thorpe KE, Zwarenstein M. The PRECIS-  
12 501 2 tool: designing trials that are fit for purpose. *BMJ.* 2015;350:h2147.
- 13 502 21. Ggita JM, Ojok C, Meyer AJ, Farr K, Shete PB, Ochom E, et al. Patterns of usage and  
14 503 preferences of users for tuberculosis-related text messages and voice calls in Uganda. *Int J*  
15 504 *Tuberc Lung Dis.* 2018;22(5):530-6.
- 16 505 22. Babirye D, Shete PB, Farr K, Nalugwa T, Ojok C, Nantale M, et al. Feasibility of a short  
17 506 message service (SMS) intervention to deliver tuberculosis testing results in peri-urban and rural  
18 507 Uganda. *J Clin Tuberc Other Mycobact Dis.* 2019;16:100110.
- 19 508 23. Harris PA, Taylor R, Minor BL, Elliott V, Fernandez M, O'Neal L, et al. The REDCap  
20 509 consortium: Building an international community of software platform partners. *J Biomed*  
21 510 *Inform.* 2019;95:103208.
- 22 511 24. Hemming K, Taljaard M, McKenzie JE, Hooper R, Copas A, Thompson JA, et al.  
23 512 Reporting of stepped wedge cluster randomised trials: extension of the CONSORT 2010  
24 513 statement with explanation and elaboration. *BMJ.* 2018;363:k1614.
- 25 514 25. Loudon K, Treweek S, Sullivan F, Donnan P, Thorpe KE, Zwarenstein M. The PRECIS-  
26 515 2 tool: designing trials that are fit for purpose. *BMJ : British Medical Journal.* 2015;350:h2147.  
27 516  
28  
29  
30  
31  
32  
33 517  
34  
35  
36  
37  
38  
39  
40  
41  
42  
43  
44  
45  
46  
47  
48  
49  
50  
51  
52  
53  
54  
55  
56  
57  
58  
59  
60

## 518 **Acknowledgements**

519 We would like to thank the patients and health facility staff who make this research possible, as  
520 well as the Uganda NTLP, for their collaboration on this protocol.

521

## 522 **Authors' contributions**

523 AC, AKa, and NK conceived and designed the study. RC, AKi, ML, CN, LKT, ASN, JG, PT, DB,  
524 DO, CB, AT, DP, AM, DD, TS, AC and AKa participated in implementation of the study. RC,  
525 AKi, AC, and AKa drafted the manuscript. All authors reviewed and approved the manuscript.

526

## 527 **Funding**

528 This Project is supported by the Stop TB Partnership's TB REACH initiative, grant number  
529 STBP/TBREACH/GSA/W6-37, which is funded by the Government of Canada, the Bill &  
530 Melinda Gates Foundation, and the United States Agency for International Development. The  
531 study sponsor is not involved in data collection, analysis or interpretation.

532

## 533 **Competing Interests**

534 The authors have no conflicts of interest to report.

535

536 **Figure 1. 99DOTS Randomization and Enrollment Schedule.** The trial includes 18 health  
537 facilities divided into 6 equal size blocks (3 health facilities per block). The health facilities all  
538 continue routine TB treatment supervision in Month 1, begin switching to the 99DOTS-based  
539 intervention strategy in Month 2 (one block per month in a random order), and all use the  
540 intervention strategy in Month 8.

541

542 **Figure 2. Flow diagram of TB treatment units and patients included in the DOT to DAT**  
543 **trial.** Eighteen TB treatment units were randomized, and all eligible patients initiating TB  
544 treatment at these facilities during the study period will be analyzed.

545

546 **Figure 3. Original and adapted versions of the 99DOTS envelope.** The original 99DOTS  
547 envelope was two-sided (top left and right). The original envelope was adapted using human-  
548 centered design to add a decorative front cover to hide pills (and thereby reduce potential stigma;  
549 bottom left); include space for writing in the health worker's name and phone number, simplified  
550 pictorial instructions for taking pills, and motivational imagery on the inside cover (bottom  
551 middle); and provide simplified guide to the order in which to take pills on the back cover (bottom

1  
2  
3 552 right). In addition, the audio tone heard when patients make daily phone calls to report medication  
4 553 dosing was replaced with a rotating series of educational or motivational messages recorded by  
5 554 local health workers.  
6  
7 555  
8  
9  
10  
11  
12  
13  
14  
15  
16  
17  
18  
19  
20  
21  
22  
23  
24  
25  
26  
27  
28  
29  
30  
31  
32  
33  
34  
35  
36  
37  
38  
39  
40  
41  
42  
43  
44  
45  
46  
47  
48  
49  
50  
51  
52  
53  
54  
55  
56  
57  
58  
59  
60

For peer review only

|         | Month |   |   |   |   |   |   |   |
|---------|-------|---|---|---|---|---|---|---|
|         | 1     | 2 | 3 | 4 | 5 | 6 | 7 | 8 |
| Block 1 |       |   |   |   |   |   |   |   |
| Block 2 |       |   |   |   |   |   |   |   |
| Block 3 |       |   |   |   |   |   |   |   |
| Block 4 |       |   |   |   |   |   |   |   |
| Block 5 |       |   |   |   |   |   |   |   |
| Block 6 |       |   |   |   |   |   |   |   |

  

|  |                                             |
|--|---------------------------------------------|
|  | Routine care (control period)               |
|  | Switch to 99DOTS (buffer period)            |
|  | 99DOTS implementation (intervention period) |

**Figure 1. 99DOTS Randomization and Enrollment Schedule.** The trial includes 18 health facilities divided into 6 equal size blocks (3 health facilities per block), each block representing an allocation sequence. The health facilities all continue routine TB treatment supervision in Month 1, begin switching to the 99DOTS-based intervention strategy in Month 2 (one block per month in a random order), and all use the intervention strategy in Month 8.

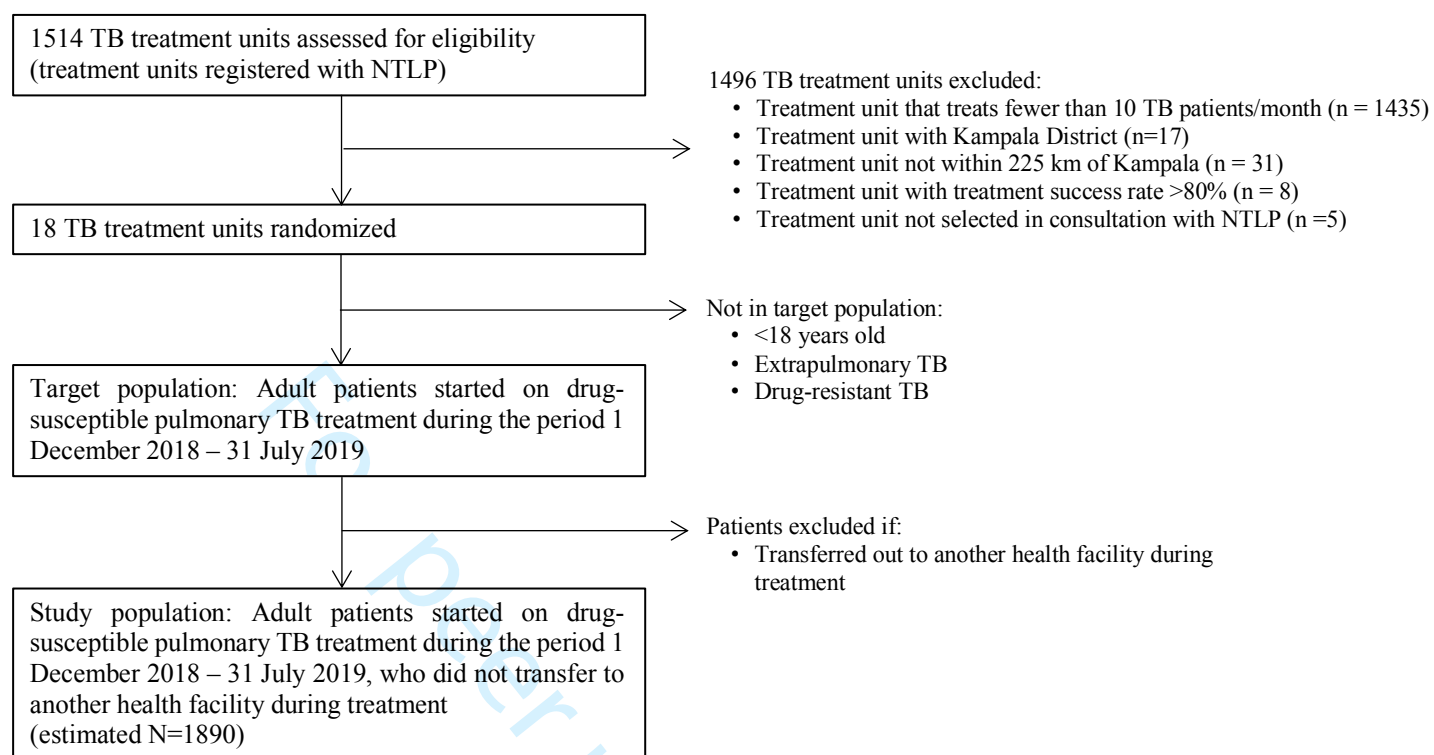

29  
30  
31  
32  
33  
34  
35  
36  
37  
38  
39  
40  
41  
42  
43  
44  
45  
46  
47  
48  
49  
50  
51  
52  
53  
54  
55  
56  
57  
58  
59  
60

**Figure 2. Flow diagram of TB treatment units and patients included in the DOT to DAT trial.** Eighteen TB treatment units were randomized, and all eligible patients initiating TB treatment at these facilities during the study period will be analyzed.

## Original 99DOTS Envelope

Front of envelope

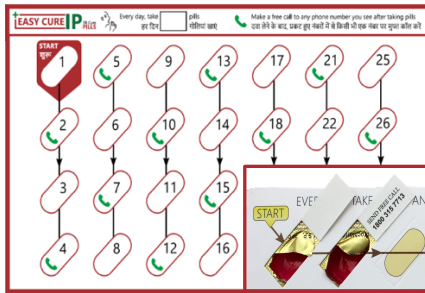

Back of envelope



## Adapted 99DOTS envelope

Front cover

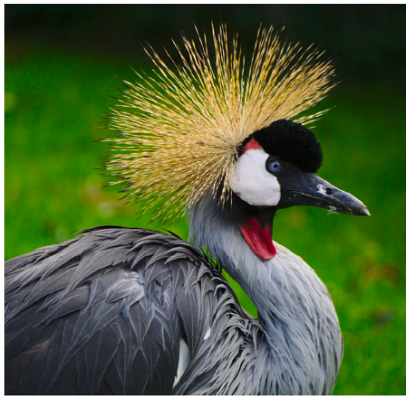

Inside cover

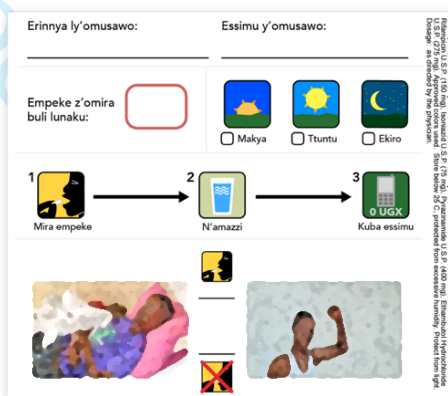

Back of envelope

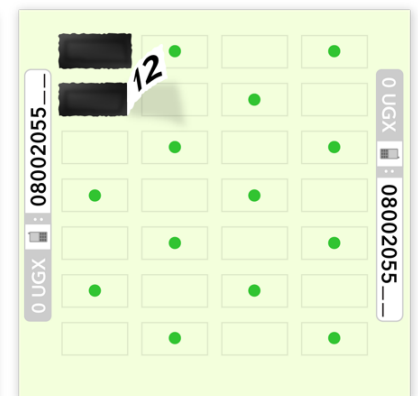

**Figure 3. Original and adapted versions of the 99DOTS envelope.** The original 99DOTS envelope was two-sided (top left and right). The original envelope was adapted using human-centered design to add a decorative front cover to hide pills (and thereby reduce potential stigma; bottom left); include space for writing in the health worker's name and phone number, simplified pictorial instructions for taking pills, and motivational imagery on the inside cover (bottom middle); and provide simplified guide to the order in which to take pills on the back cover (bottom right). In addition, the audio tone heard when patients make daily phone calls to report medication dosing was replaced with a rotating series of educational or motivational messages recorded by local health workers.



| <b>Supplementary materials 3: Checklist of information to include when reporting a stepped wedge cluster randomised trial (SW-CRT)</b> |                |                                                                                                                                                                                                                                                                                                                      |                |
|----------------------------------------------------------------------------------------------------------------------------------------|----------------|----------------------------------------------------------------------------------------------------------------------------------------------------------------------------------------------------------------------------------------------------------------------------------------------------------------------|----------------|
| <b>Topic</b>                                                                                                                           | <b>Item no</b> | <b>Checklist item</b>                                                                                                                                                                                                                                                                                                | <b>Page no</b> |
| <b>Title and abstract</b>                                                                                                              |                |                                                                                                                                                                                                                                                                                                                      |                |
|                                                                                                                                        | 1a             | Identification as a SW-CRT in the title.                                                                                                                                                                                                                                                                             |                |
|                                                                                                                                        | 1b             | Structured summary of trial design, methods, results, and conclusions (see separate SW-CRT checklist for abstracts).                                                                                                                                                                                                 |                |
| <b>Introduction</b>                                                                                                                    |                |                                                                                                                                                                                                                                                                                                                      |                |
| Background and objectives                                                                                                              | 2a             | Scientific background. Rationale for using a cluster design and rationale for using a stepped wedge design.                                                                                                                                                                                                          |                |
|                                                                                                                                        | 2b             | Specific objectives or hypotheses.                                                                                                                                                                                                                                                                                   |                |
| <b>Methods</b>                                                                                                                         |                |                                                                                                                                                                                                                                                                                                                      |                |
| Trial design                                                                                                                           | 3a             | Description and diagram of trial design including definition of cluster, number of sequences, number of clusters randomised to each sequence, number of periods, duration of time between each step, and whether the participants assessed in different periods are the same people, different people, or a mixture. |                |
|                                                                                                                                        | 3b             | Important changes to methods after trial commencement (such as eligibility criteria), with reasons.                                                                                                                                                                                                                  |                |
| Participants                                                                                                                           | 4a             | Eligibility criteria for clusters and participants.                                                                                                                                                                                                                                                                  |                |
|                                                                                                                                        | 4b             | Settings and locations where the data were collected.                                                                                                                                                                                                                                                                |                |
| Interventions                                                                                                                          | 5              | The intervention and control conditions with sufficient details to allow replication, including whether the intervention was maintained or repeated, and whether it was delivered at the cluster level, the individual participant level, or both.                                                                   |                |
| Outcomes                                                                                                                               | 6a             | Completely defined prespecified primary and secondary outcome measures, including how and when they were assessed.                                                                                                                                                                                                   |                |
|                                                                                                                                        | 6b             | Any changes to trial outcomes after the trial commenced, with reasons.                                                                                                                                                                                                                                               |                |
| Sample size                                                                                                                            | 7a             | How sample size was determined. Method of calculation and relevant parameters with sufficient detail so the calculation can be replicated. Assumptions made about correlations between outcomes of participants from the same cluster. (see separate checklist for SW-CRT sample size items).                        |                |
|                                                                                                                                        | 7b             | When applicable, explanation of any interim analyses and stopping guidelines.                                                                                                                                                                                                                                        |                |
| <b>Randomisation</b>                                                                                                                   |                |                                                                                                                                                                                                                                                                                                                      |                |
| Sequence generation                                                                                                                    | 8a             | Method used to generate the random allocation to the sequences of treatments.                                                                                                                                                                                                                                        |                |
|                                                                                                                                        | 8b             | Type of randomisation; details of any constrained randomisation or stratification, if used.                                                                                                                                                                                                                          |                |
| Allocation concealment mechanism                                                                                                       | 9              | Specification that allocation was based on clusters; description of any methods used to conceal the allocation from the clusters until after recruitment.                                                                                                                                                            |                |
| Implementation                                                                                                                         | 10a            | Who generated the randomisation schedule, who enrolled clusters, and who assigned clusters to sequences.                                                                                                                                                                                                             |                |
|                                                                                                                                        | 10b            | Mechanism by which individual participants were included in clusters for the purposes of the trial (such as complete enumeration, random sampling; continuous recruitment or ascertainment; or recruitment at a fixed point in time), including who recruited or identified participants.                            |                |
|                                                                                                                                        | 10c            | Whether, from whom and when consent was sought and for what; whether this differed between treatment conditions.                                                                                                                                                                                                     |                |
| Blinding                                                                                                                               | 11a            | If done, who was blinded after assignment to sequences (eg, cluster level participants, individual level participants, those assessing outcomes) and how.                                                                                                                                                            |                |
|                                                                                                                                        | 11b            | If relevant, description of the similarity of treatments.                                                                                                                                                                                                                                                            |                |
| Statistical methods                                                                                                                    | 12a            | Statistical methods used to compare treatment conditions for primary and secondary outcomes including how time effects, clustering and repeated measures were taken into account.                                                                                                                                    |                |
|                                                                                                                                        | 12b            | Methods for additional analyses, such as subgroup analyses, sensitivity analyses, and adjusted analyses.                                                                                                                                                                                                             |                |

(Continued)

1  
2  
3  
4  
5  
6  
7  
8  
9  
10  
11  
12  
13  
14  
15  
16  
17  
18  
19  
20  
21  
22  
23  
24  
25  
26  
27  
28  
29  
30  
31  
32  
33  
34  
35  
36  
37  
38  
39  
40  
41  
42  
43  
44  
45  
46  
47  
48  
49  
50  
51  
52  
53  
54  
55  
56  
57  
58  
59  
60

| <b>Supplementary materials 3 (Continued)</b>         |                |                                                                                                                                                                                                                                                                   |                |
|------------------------------------------------------|----------------|-------------------------------------------------------------------------------------------------------------------------------------------------------------------------------------------------------------------------------------------------------------------|----------------|
| <b>Topic</b>                                         | <b>Item no</b> | <b>Checklist item</b>                                                                                                                                                                                                                                             | <b>Page no</b> |
| <b>Results</b>                                       |                |                                                                                                                                                                                                                                                                   |                |
| Participant flow (a diagram is strongly recommended) | 13a            | For each treatment condition or allocated sequence, the numbers of clusters and participants who were assessed for eligibility, were randomly assigned, received intended treatments, and were analysed for the primary outcome (see separate SW-CRT flow chart). |                |
|                                                      | 13b            | For each treatment condition or allocated sequence, losses and exclusions for both clusters and participants with reasons.                                                                                                                                        |                |
| Recruitment                                          | 14a            | Dates defining the steps, initiation of intervention, and deviations from planned dates. Dates defining recruitment and follow-up for participants.                                                                                                               |                |
|                                                      | 14b            | Why the trial ended or was stopped.                                                                                                                                                                                                                               |                |
| Baseline data                                        | 15             | Baseline characteristics for the individual and cluster levels as applicable for each treatment condition or allocated sequence.                                                                                                                                  |                |
| Numbers analysed                                     | 16             | The number of observations and clusters included in each analysis for each treatment condition and whether the analysis was according to the allocated schedule.                                                                                                  |                |
| Outcomes and estimation                              | 17a            | For each primary and secondary outcome, results for each treatment condition, and the estimated effect size and its precision (such as 95% confidence interval); any correlations (or covariances) and time effects estimated in the analysis.                    |                |
|                                                      | 17b            | For binary outcomes, presentation of both absolute and relative effect sizes is recommended.                                                                                                                                                                      |                |
| Ancillary analyses                                   | 18             | Results of any other analyses performed, including subgroup analyses and adjusted analyses, distinguishing prespecified from exploratory.                                                                                                                         |                |
| Harms                                                | 19             | Important harms or unintended effects in each treatment condition (for specific guidance see CONSORT for harms).                                                                                                                                                  |                |
| <b>Discussion</b>                                    |                |                                                                                                                                                                                                                                                                   |                |
| Limitations                                          | 20             | Trial limitations, addressing sources of potential bias, imprecision, and, if relevant, multiplicity of analyses.                                                                                                                                                 |                |
| Generalisability                                     | 21             | Generalisability (external validity, applicability) of the trial findings. Generalisability to clusters or individual participants, or both (as relevant).                                                                                                        |                |
| Interpretation                                       | 22             | Interpretation consistent with results, balancing benefits and harms, and considering other relevant evidence.                                                                                                                                                    |                |
| <b>Other information</b>                             |                |                                                                                                                                                                                                                                                                   |                |
| Registration                                         | 23             | Registration number and name of trial registry.                                                                                                                                                                                                                   |                |
| Protocol                                             | 24             | Where the full trial protocol can be accessed, if available.                                                                                                                                                                                                      |                |
| Funding                                              | 25             | Sources of funding and other support (such as supply of drugs), and the role of funders.                                                                                                                                                                          |                |
| Research ethics review                               | 26             | Whether the study was approved by a research ethics committee, with identification of the review committee(s). Justification for any waiver or modification of informed consent requirements.                                                                     |                |

This checklist has been taken from table 3 in *BMJ* 2018;363:k1614, as a standalone document for readers to print out or fill in electronically.

# BMJ Open

## Study protocol and implementation details for a pragmatic, stepped-wedge cluster randomized trial of a digital adherence technology to facilitate tuberculosis treatment completion

|                               |                                                                                                                                                                                                                                                                                                                                                                                                                                                                                                                                                                                                                                                                                                                                                                                                                                                                                                                                                                                                                                                                                                                                                                                                                                                                                                                                                                                                                                                                                                                                                                                                                                                                                                                                                                                                                                                                                                                                                                                                                                                                                                  |
|-------------------------------|--------------------------------------------------------------------------------------------------------------------------------------------------------------------------------------------------------------------------------------------------------------------------------------------------------------------------------------------------------------------------------------------------------------------------------------------------------------------------------------------------------------------------------------------------------------------------------------------------------------------------------------------------------------------------------------------------------------------------------------------------------------------------------------------------------------------------------------------------------------------------------------------------------------------------------------------------------------------------------------------------------------------------------------------------------------------------------------------------------------------------------------------------------------------------------------------------------------------------------------------------------------------------------------------------------------------------------------------------------------------------------------------------------------------------------------------------------------------------------------------------------------------------------------------------------------------------------------------------------------------------------------------------------------------------------------------------------------------------------------------------------------------------------------------------------------------------------------------------------------------------------------------------------------------------------------------------------------------------------------------------------------------------------------------------------------------------------------------------|
| Journal:                      | <i>BMJ Open</i>                                                                                                                                                                                                                                                                                                                                                                                                                                                                                                                                                                                                                                                                                                                                                                                                                                                                                                                                                                                                                                                                                                                                                                                                                                                                                                                                                                                                                                                                                                                                                                                                                                                                                                                                                                                                                                                                                                                                                                                                                                                                                  |
| Manuscript ID                 | bmjopen-2020-039895.R2                                                                                                                                                                                                                                                                                                                                                                                                                                                                                                                                                                                                                                                                                                                                                                                                                                                                                                                                                                                                                                                                                                                                                                                                                                                                                                                                                                                                                                                                                                                                                                                                                                                                                                                                                                                                                                                                                                                                                                                                                                                                           |
| Article Type:                 | Protocol                                                                                                                                                                                                                                                                                                                                                                                                                                                                                                                                                                                                                                                                                                                                                                                                                                                                                                                                                                                                                                                                                                                                                                                                                                                                                                                                                                                                                                                                                                                                                                                                                                                                                                                                                                                                                                                                                                                                                                                                                                                                                         |
| Date Submitted by the Author: | 09-Nov-2020                                                                                                                                                                                                                                                                                                                                                                                                                                                                                                                                                                                                                                                                                                                                                                                                                                                                                                                                                                                                                                                                                                                                                                                                                                                                                                                                                                                                                                                                                                                                                                                                                                                                                                                                                                                                                                                                                                                                                                                                                                                                                      |
| Complete List of Authors:     | <p>Crowder, Rebecca; University of California San Francisco, Center for Tuberculosis and Division of Pulmonary and Critical Care Medicine, San Francisco General Hospital<br/>         Kityamuwesi, Alex; Uganda Tuberculosis Implementation Research Consortium,<br/>         Kiwanuka, Noah; Makerere University College of Health Sciences, School of Public Health<br/>         Lamunu, Maureen; Uganda Tuberculosis Implementation Research Consortium,<br/>         Namale, Catherine; Uganda Tuberculosis Implementation Research Consortium,<br/>         Tinka, Lynn; Uganda Tuberculosis Implementation Research Consortium,</p> <p>Nakate, Agnes; Uganda Tuberculosis Implementation Research Consortium,<br/>         Ggita, Joseph; Uganda Tuberculosis Implementation Research Consortium,<br/>         Turimumahoro, Patricia; Uganda Tuberculosis Implementation Research Consortium,<br/>         Babirye, Diana; Uganda Tuberculosis Implementation Research Consortium,<br/>         Oyuku, Denis; Uganda Tuberculosis Implementation Research Consortium,<br/>         Berger, Christopher; University of California San Francisco, Center for Tuberculosis and Division of Pulmonary and Critical Care Medicine, San Francisco General Hospital<br/>         Tucker, Austin; Johns Hopkins University Bloomberg School of Public Health, Department of Epidemiology<br/>         Patel, Devika; University of California San Francisco, The Better Lab, Department of Surgery, Zuckerberg San Francisco General Hospital<br/>         Sammann, Amanda; University of California San Francisco, The Better Lab, Department of Surgery, Zuckerberg San Francisco General Hospital<br/>         Dowdy, DW; Johns Hopkins University Bloomberg School of Public Health, Department of Epidemiology<br/>         Stavia, Turyahabwe; Republic of Uganda Ministry of Health, National Tuberculosis and Leprosy Program<br/>         Cattamanchi, A; University of California San Francisco, Center for Tuberculosis and Division of Pulmonary and Critical Care Medicine, San</p> |

1  
2  
3  
4  
5  
6  
7  
8  
9  
10  
11  
12  
13  
14  
15  
16  
17  
18  
19  
20  
21  
22  
23  
24  
25  
26  
27  
28  
29  
30  
31  
32  
33  
34  
35  
36  
37  
38  
39  
40  
41  
42  
43  
44  
45  
46  
47  
48  
49  
50  
51  
52  
53  
54  
55  
56  
57  
58  
59  
60

|                                                        |                                                                                                                                                                                                                       |
|--------------------------------------------------------|-----------------------------------------------------------------------------------------------------------------------------------------------------------------------------------------------------------------------|
|                                                        | Francisco General Hospital<br>Katamba, Achilles; Makerere University College of Health Sciences,<br>Clinical Epidemiology and Biostatistics Unit; Uganda Tuberculosis<br>Implementation Research Consortium, Medicine |
| <b>&lt;b&gt;Primary Subject<br/>Heading&lt;/b&gt;:</b> | Infectious diseases                                                                                                                                                                                                   |
| <b>Secondary Subject Heading:</b>                      | Public health, Global health                                                                                                                                                                                          |
| <b>Keywords:</b>                                       | Tuberculosis < INFECTIOUS DISEASES, Public health < INFECTIOUS<br>DISEASES, International health services < HEALTH SERVICES<br>ADMINISTRATION & MANAGEMENT                                                            |
|                                                        |                                                                                                                                                                                                                       |





I, the Submitting Author has the right to grant and does grant on behalf of all authors of the Work (as defined in the below author licence), an exclusive licence and/or a non-exclusive licence for contributions from authors who are: i) UK Crown employees; ii) where BMJ has agreed a CC-BY licence shall apply, and/or iii) in accordance with the terms applicable for US Federal Government officers or employees acting as part of their official duties; on a worldwide, perpetual, irrevocable, royalty-free basis to BMJ Publishing Group Ltd ("BMJ") its licensees and where the relevant Journal is co-owned by BMJ to the co-owners of the Journal, to publish the Work in this journal and any other BMJ products and to exploit all rights, as set out in our [licence](#).

The Submitting Author accepts and understands that any supply made under these terms is made by BMJ to the Submitting Author unless you are acting as an employee on behalf of your employer or a postgraduate student of an affiliated institution which is paying any applicable article publishing charge ("APC") for Open Access articles. Where the Submitting Author wishes to make the Work available on an Open Access basis (and intends to pay the relevant APC), the terms of reuse of such Open Access shall be governed by a Creative Commons licence – details of these licences and which [Creative Commons](#) licence will apply to this Work are set out in our licence referred to above.

Other than as permitted in any relevant BMJ Author's Self Archiving Policies, I confirm this Work has not been accepted for publication elsewhere, is not being considered for publication elsewhere and does not duplicate material already published. I confirm all authors consent to publication of this Work and authorise the granting of this licence.

**Title:** Study protocol and implementation details for a pragmatic, stepped-wedge cluster randomized trial of a digital adherence technology to facilitate tuberculosis treatment completion

Authors: Rebecca Crowder<sup>1\*</sup>, Alex Kityamuwesi<sup>2\*</sup>, Noah Kiwanuka<sup>3</sup>, Maureen Lamunu<sup>2</sup>, Catherine Namale<sup>2</sup>, Lynn Kunihiro Tinka<sup>2</sup>, Agnes Sanyu Nakate<sup>2</sup>, Joseph Ggita<sup>2</sup>, Patricia Turimumahoro<sup>2</sup>, Diana Babirye<sup>2</sup>, Denis Oyuku<sup>2</sup>, Christopher Berger<sup>1</sup>, Austin Tucker<sup>4</sup>, Devika Patel<sup>5</sup>, Amanda Sammann<sup>5</sup>, David Dowdy<sup>2,4</sup>, Turyahabwe Stavia<sup>6</sup>, Adithya Cattamanchi<sup>1,2</sup>, Achilles Katamba<sup>2,3</sup>

\* Authors contributed equally

#### Affiliations:

1. Curry International Tuberculosis Center and Division of Pulmonary and Critical Care Medicine, Zuckerberg San Francisco General Hospital, University of California San Francisco, San Francisco, CA, USA
2. Uganda Tuberculosis Implementation Research Consortium, Kampala, Uganda
3. School of Public Health, Makerere University College of Health Sciences, Kampala, Uganda
4. Department of Epidemiology, Johns Hopkins Bloomberg School of Public Health, Baltimore, MD, USA
5. The Better Lab, Department of Surgery, Zuckerberg San Francisco General Hospital, University of California San Francisco, San Francisco, CA, USA
6. National Tuberculosis and Leprosy Program, Uganda Ministry of Health, Kampala, Uganda

#### Correspondence to:

Achilles Katamba  
[axk95@case.edu](mailto:axk95@case.edu)  
Makerere University College of Health Sciences,  
Clinical Epidemiology and Biostatistics Unit  
Mulago Hill Road  
Clinical Research Building Floor 3 Room 3.1  
Kampala, Uganda 21696  
+256-772-575-038

Abstract word count: 264

Manuscript word count (excluding tables and figures): 4,307

1  
2  
3 **37 ABSTRACT**  
4

5 **38 Introduction:** Low-cost digital adherence technologies (DAT) such as 99DOTS have emerged as  
6  
7 **39** an alternative to directly observed therapy, (DOT), the current standard for TB treatment  
8  
9 **40** supervision. However, there are limited data to support DAT scale-up. The “DOT to DAT” trial  
10  
11 **41** aims to evaluate the effectiveness and implementation of a 99DOTS-based TB treatment  
12  
13 **42** supervision strategy.

14  
15 **43 Methods and analysis:** This is a pragmatic, stepped-wedge cluster randomized trial, with hybrid  
16  
17 **44** type 2 effectiveness-implementation design. The trial will include all adults (estimated N=1890)  
18  
19 **45** treated for drug-susceptible pulmonary TB over an 8-month period at 18 TB treatment units in  
20  
21 **46** Uganda. Three sites per month will switch from routine care (DOT) to the intervention (99DOTS-  
22  
23 **47** based treatment supervision) beginning in Month 2, with the order determined randomly. 99DOTS  
24  
25 **48** enables patients to be monitored while self-administering TB medicines. Patients receive daily  
26  
27 **49** automated SMS dosing reminders and confirm dosing by calling toll-free numbers. The primary  
28  
29 **50** effectiveness outcome is the proportion of patients completing TB treatment. With 18 clusters  
30  
31 **51** randomized into 6 steps and an average cluster size of 15 patients per month, the study will have  
32  
33 **52** 89% power to detect a 10% or greater increase in treatment completion between the routine care  
34  
35 **53** and intervention periods. Secondary outcomes include more proximal effectiveness measures as  
36  
37 **54** well as quantitative and qualitative assessments of the reach, adoption and implementation of the  
38  
39 **55** intervention.

40  
41 **56 Ethics and dissemination:** Ethics approval was granted by institutional review boards at  
42  
43 **57** Makerere University School of Public Health and the University of California San Francisco.  
44  
45 **58** Findings will be disseminated through peer-reviewed publications, presentations at scientific  
46  
47 **59** conferences and presentations to key stakeholders.  
48

49  
50  
51 **60**  
52  
53 **61 Trial registration number:** PACTR201808609844917  
54  
55  
56  
57  
58  
59  
60

## 62 STRENGTHS AND LIMITATIONS OF THIS STUDY

- 63 • This is the first randomized trial to evaluate a 99DOTS-based strategy for TB treatment  
64 supervision.
- 65 • The intervention was designed using the PRECEDE framework and adapted for local  
66 context in Uganda using human-centered design.
- 67 • Trial outcomes were selected using the RE-AIM framework.
- 68 • The intervention was implemented by health facility staff and will be assessed using  
69 routinely collected data to approximate the real-world impact of this intervention.
- 70 • Adherence is not a primary outcome of this trial.

## 72 INTRODUCTION

73 Tuberculosis (TB) is the leading infectious cause of death worldwide despite being a preventable  
74 and curable disease.(1) Poor adherence to medication continues to be a major obstacle to TB  
75 elimination, resulting in prolonged infectiousness, emergence of multidrug resistance, and  
76 increased risk of poor treatment outcomes. The World Health Organization (WHO)-recommended  
77 strategy, directly observed therapy short-course (DOTS), has been the standard-of-care for TB  
78 treatment supervision since the 1990s. As part of this strategy, a health worker is expected to  
79 observe patients swallow each dose of anti-TB medication. However, directly observed therapy  
80 (DOT) is time-consuming, costly and inconvenient for both patients and providers, while its  
81 implementation is also difficult to monitor.(2, 3) Not surprisingly, TB treatment success rates  
82 remain below the 90% target in most high-burden countries, despite reported DOT coverage over  
83 90%.(1)

84  
85 With the increase in mobile phone penetration among patients and healthcare workers in high TB  
86 burden countries,(4) digital adherence technologies (DATs) could address some of the challenges  
87 associated with implementation of the DOTS strategy in a patient-centered manner. To date, such  
88 technologies have received only a conditional recommendation by the WHO due to very low  
89 quality of evidence.(5) The first randomized trial of a DAT found that SMS reminders alone did  
90 not improve medication adherence, but a medication event reminder monitor did.(6) However,  
91 treatment outcomes did not improve and both trials and programmatic research have shown  
92 variable uptake of DAT.(7-10)



1  
2  
3 93  
4  
5 94 The “DOT to DAT” trial aims to evaluate the effectiveness, implementation and cost-effectiveness  
6 95 of a culturally and contextually adapted version of 99DOTS in Uganda. 99DOTS is a low-cost  
7 96 DAT wherein patients self-report medication adherence by calling toll-free phone numbers hidden  
8  
9 97 underneath pills in blister packs.(11) We present the research methods used for the first  
10  
11 98 randomized trial to evaluate the effectiveness and implementation of a 99DOTS-based strategy for  
12  
13 99 TB treatment supervision in routine care settings.  
14  
15

16 100

### 17 101 **Conceptual basis for trial design**

18  
19 102 Numerous conceptual frameworks have emerged to improve the implementation and success of  
20  
21 103 health interventions through theory-based design and evaluation. The PRECEDE framework(12)  
22  
23 104 guided the development of the 99DOTS-based intervention strategy, while the RE-AIM  
24  
25 105 framework guided its comprehensive evaluation. Behavior change models including the  
26  
27 106 Theoretical Domains Framework (TDF)(13, 14) and the Unified Theory of Acceptance and Use  
28  
29 107 of Technology (UTAUT)(15, 16) guided the assessment and analysis of patient- and provider-level  
30  
31 108 barriers to adoption and implementation of 99DOTS.  
32

33 109

34 110 The PRECEDE framework emphasizes the need for multi-faceted health promotion interventions  
35  
36 111 to address predisposing, enabling, and reinforcing factors in order to achieve behavior change.(12)  
37  
38 112 The 99DOTS-based intervention was designed to address key predisposing (social isolation and  
39  
40 113 the high direct and indirect cost of clinic visits), enabling (inability of health facility staff to focus  
41  
42 114 limited time and resources on non-adherent patients), and reinforcing (a lack of real-time  
43  
44 115 information on patient adherence to medications) factors related to TB treatment adherence  
45  
46 116 identified through the literature and formative human factors research that preceded the trial.(11)  
47

48 117

49 118 The RE-AIM framework was designed to ensure that trials not only assess the effect of  
50  
51 119 interventions but also their translatability and public health impact.(17, 18) This hybrid type 2 trial  
52  
53 120 therefore focuses on the effectiveness of the 99DOTS-based intervention in improving TB  
54  
55 121 treatment outcomes, but concurrently examines its reach into the target population, adoption by  
56  
57 122 target settings and staff, and implementation fidelity and costs.(19) The goal of assessing  
58  
59

1  
2  
3 123 translatability and public health impact is further enhanced through pragmatic design choices for  
4 124 each element of the trial in order to maximize applicability in real-world settings.(20)

5  
6 125

## 7 8 126 **METHODS AND ANALYSIS**

### 9 10 127 **Study aims**

11 128 The primary aim of the trial is to determine whether a 99DOTS-based strategy increases the  
12 129 proportion of patients who complete TB treatment in comparison to routine care. Secondary aims  
13 130 include 1) comparing short-term treatment outcomes and loss to follow-up between the  
14 131 intervention and routine care arms; 2) assessing the reach, adoption and implementation of the  
15 132 99DOTS-based strategy; and 3) evaluating the incremental costs and cost-effectiveness of the  
16 133 99DOTS-based strategy as compared to routine care from the health system perspective. Our  
17 134 primary hypothesis is that 99DOTS-based TB treatment supervision will improve TB treatment  
18 135 outcomes. Our secondary hypotheses are that the 99DOTS-based strategy will have high uptake  
19 136 among patients and providers, and be cost-effective.

20  
21  
22  
23  
24  
25  
26  
27 137

### 28 29 138 **Study design**

30 139 This is a pragmatic, stepped-wedge randomized trial, with a hybrid type 2 implementation-  
31 140 effectiveness design.(19) We included repeated cross-sectional samples of eligible individuals  
32 141 initiating TB treatment at participating health facilities at 8 time points (months). Patient outcomes  
33 142 were assigned to the health facility and month in which they initiated treatment. As depicted in  
34 143 **Figure 1**, the intervention strategy was sequentially introduced at 3 sites each in Months 2-6, with  
35 144 all sites under routine care in Month 1 and all sites using the intervention strategy in Month 8.  
36 145 Following implementation of the intervention at each site, health facility staff were instructed to  
37 146 offer 99DOTS to all new eligible patients initiating treatment and to continue supervising patients  
38 147 already on treatment using routine care. The month of switch from control to intervention (buffer  
39 148 period) will be excluded from analysis. We chose the stepped-wedge trial design to maximize  
40 149 equity and acceptability (all sites will receive the intervention), minimize logistical constraints  
41 150 associated with introducing the intervention simultaneously at a large number of sites, account for  
42 151 secular outcome trends, and allow for iterative learning and changes in intervention roll-out as  
43 152 would occur during eventual scale-up. We chose a highly pragmatic approach to trial

1  
2  
3 153 implementation, as described in sections below, to understand the real-world impact of the  
4  
5 154 99DOTS-based intervention strategy.

6  
7 155

## 8 156 **Study Setting**

9  
10 157 The trial is being conducted at 18 TB treatment units within hospitals and health centers across 15  
11  
12 158 districts of Uganda. The TB treatment units are affiliated with the Uganda National Tuberculosis  
13  
14 159 and Leprosy Program (NTLP) and provide TB treatment free of charge using a mix of facility- and  
15  
16 160 community-based DOTS. Uganda was chosen as the trial setting due to its high TB burden (200  
17  
18 161 cases/100,000 in 2018) and low treatment success rate (72% in 2017).(1) Previous studies have  
19  
20 162 found 69-75% of TB patients in Uganda have access to a phone.(21, 22)

21  
22 163

23 164 Study sites were selected after reviewing 2016 TB treatment outcomes and 2017 TB case finding  
24  
25 165 data reported to the NTLP from all 1514 registered TB treatment units. We included treatment  
26  
27 166 units that 1) diagnosed >10 pulmonary TB patients/month in 2017, 2) were not located within  
28  
29 167 Kampala District (many active ongoing projects in this district), 3) were located within 225 km of  
30  
31 168 Kampala City (for feasibility), and 4) had a pulmonary TB treatment success rate in 2016 <80%  
32  
33 169 (to be able to show an impact).

34  
35 170

36 171 Of the 1514 treatment units registered with the Uganda NTLP, 23 treatment units met our inclusion  
37  
38 172 criteria (**Figure 2**). The majority (n=1435) diagnosed fewer than 10 TB patients/month in 2017,  
39  
40 173 17 are located within Kampala district, 31 are not within 225 km of Kampala district, and 9 had a  
41  
42 174 treatment success rate >80% in 2016. Of the 23 remaining treatment units, we selected 18 located  
43  
44 175 in 15 districts (10 in Central, 7 in Eastern and 1 in Western Uganda) in consultation with the NTLP.  
45  
46 176 Project staff visited the Chief Administrative Officers, District Health Officers and Facility  
47  
48 177 Directors for the 18 sites to discuss the study. All signed a memorandum of agreement for their  
49  
50 178 site to participate in the study.

51  
52 179

## 53 180 **Study participants**

54  
55 181 All adult patients treated for drug-susceptible pulmonary TB at participating treatment units during  
56  
57 182 the study period will be eligible for inclusion. Children, patients treated for drug-resistant or  
58  
59 183 extrapulmonary TB, and patients transferred to another facility to complete treatment will be

184 excluded. To be enrolled on 99DOTS, a patient must also have access to a phone. Surveys to assess  
 185 99DOTS implementation will be conducted in a random subset of eligible patients and all health  
 186 workers involved in TB treatment supervision at each treatment unit. Time-and-motion studies to  
 187 assess costs will also be conducted among health workers involved in TB treatment supervision at  
 188 each treatment unit.

189

### 190 **Routine care and intervention strategies**

191 *Routine care.* The conventional approach to TB treatment supervision in Uganda is a mix of  
 192 community- and facility-based DOT, as per NTLP guidelines. At the time of treatment initiation,  
 193 treatment unit staff record patient demographic and clinical details in the NTLP register and are  
 194 supposed to provide TB-focused counseling. Most TB patients are treated using community-based  
 195 DOT, wherein they name a treatment supporter, a family member or non-family community  
 196 member, and are provided with a 2-week supply of medicines in the first two months (intensive  
 197 phase) and a one-month supply of medicines in the next four months (continuation phase) of TB  
 198 treatment. Patients take their medicines from home (with or without observation by a treatment  
 199 supporter) and return to the health facility for medication refills. At each refill visit, health facility  
 200 staff are supposed to assess adherence via patient self-report and provide additional counseling.  
 201 Health facility staff are also supposed to call or visit patients who do not return for refills, but  
 202 patient follow-up is limited across health facilities.

203

204 *Intervention.* The 99DOTS-based intervention strategy is comprised of four main components that  
 205 address distinct barriers to successful TB treatment (**Table 1**):

- 206 1) Daily automated SMS dosing reminders
- 207 2) Daily dosing confirmation using toll-free phone calls
- 208 3) Weekly automated interactive voice response (IVR) check-in phone calls
- 209 4) Differential management protocol based on dosing history and response to IVR check-in

210

211 **Table 1. Components of the “DOT to DAT” trial intervention and corresponding barriers**  
 212 **addressed.**

213

| Component | Barrier addressed |
|-----------|-------------------|
|-----------|-------------------|

|   |                                                            |                                                                                                                                                                                         |
|---|------------------------------------------------------------|-----------------------------------------------------------------------------------------------------------------------------------------------------------------------------------------|
| 1 | Daily dosing reminders via automated SMS                   | Addresses high cost of clinic visits for patients and assists with memory and planning processes known to be importance to adherence.                                                   |
| 2 | Daily dosing confirmation via toll-free phone calls        | Addresses high cost of clinic visits for patients, lack of real-time information for providers on patient adherence to medications.                                                     |
| 3 | Weekly check-in via interactive voice response phone calls | Addresses lack of social support and feeling of isolation during TB treatment; shown to be effective in other contexts at increasing connection with CHW and reducing social isolation. |
| 4 | Differential management protocol                           | Addresses limited time and resources among TB treatment unit staff and the need to focus on non-adherent patients.                                                                      |

214  
215 Formative research using human-centered design was used to adapt the generic 99DOTS product  
216 to the local context, including changes to the envelope design and addition of a rotating series of  
217 educational/motivational audio messages heard when patients call in to report dosing (details of  
218 the formative research will be reported in a separate publication) (**Figure 3**).

219  
220 TB treatment unit staff will be requested to offer 99DOTS-based treatment supervision to all  
221 eligible patients initiating TB treatment, and to register patients who accept 99DOTS-based  
222 treatment supervision on the 99DOTS platform via a mobile app. Given the pragmatic nature of  
223 the trial, the decision to offer and accept 99DOTS-based treatment supervision will be made by  
224 treatment unit staff and patients, respectively. Once registered, treatment unit staff will instruct  
225 patients on how to use the 99DOTS pill pack and make a call to the 99DOTS system using the  
226 toll-free number revealed when pills are pushed out of the medication blister pack (**Figure 3**). Staff  
227 will also help patients personalize their 99DOTS pill pack by choosing a decorative cover,  
228 educational or motivational sticker for the inside flap, writing in their health worker's contact  
229 information, and selecting a time of day to take their medication (**Figure 3**).

230  
231 When patients call to confirm dosing, they hear a recorded educational or motivational message  
232 about continuing and completing TB treatment. Each dose confirmed via phone call is logged by  
233 99DOTS and reflected on the 99DOTS smartphone app dashboard, viewable by treatment unit  
234 staff. During routine drug refill visits (same schedule as described for routine care period), health

235 facility staff are asked to review adherence data in the 99DOTS app before providing counseling.  
236 At the conclusion of the intensive phase of treatment, patients with adherence >90% are offered  
237 the option of returning back to the health facility after two months instead of the standard one  
238 month.

239  
240 Health facilities using 99DOTS to manage TB patient treatment will be provided one smartphone  
241 per facility, minimal funds to cover cell phone data, and an average of 300,000 US\$ (approximately  
242 \$82 USD) per month to facilitate patient follow-up. Treatment unit staff will not be provided any  
243 extra compensation to reflect future conditions under eventual scale-up.

### 244 245 **Implementation considerations**

246 99DOTS training will occur at each health facility during the month in which it is scheduled to  
247 switch to the intervention. Project staff and the District TB Officer will conduct a 2-3 day training  
248 jointly at each health facility using standardized training materials. Treatment unit staff will be  
249 trained on how to register patients on the 99DOTS platform via a smartphone app, counsel patients  
250 regarding use of 99DOTS, use the 99DOTS application to review dosing history, and conduct  
251 differential management based on dosing history and response to weekly check-ins. Mentored  
252 patient enrollment on 99DOTS will be conducted as part of the training.

253  
254 During the trial, treatment unit staff will make all decisions regarding management of TB patients  
255 in both the routine care and intervention periods. Research staff will not be onsite after training  
256 with the exception of 2-3 day quarterly site visits to resolve data cleaning queries and implement  
257 surveys and health economic sub-studies. Thus, the implementation is highly pragmatic and meant  
258 to approximate how 99DOTS would be used at treatment units in the absence of a research study.

### 259 260 **Randomization**

261 The 18 health facilities will be randomly assigned to one of the six allocation sequences (**Figure**  
262 **1**) using a simple, unrestricted two-stage process. This process will occur by simple drawing during  
263 a public randomization ceremony held in Kampala, Uganda. A representative from each TB  
264 treatment unit, district health officers, and Uganda NTLP staff will be invited to attend the  
265 ceremony. First, health facilities (*i.e.*, clusters) will be randomly assigned into six blocks of three

1  
2  
3 266 by having health facility representatives each draw 1 of 18 balls (3 each labeled A-F) from an  
4  
5 267 opaque bag. Blocks will then be randomly assigned to an intervention initiation time, which will  
6  
7 268 occur at equally spaced one-month intervals during the trial, by drawing of 6 balls labeled 1-6 from  
8  
9 269 an opaque bag.

10 270

## 11 271 **Blinding**

12 272 Blinding of the assigned intervention is not feasible given intervention implementation at the  
13  
14 273 health facility level. Where possible, the investigators and study staff, with the exception of the  
15  
16 274 statistician and data manager, will be blinded to aggregate TB outcomes by study period.

17 275

## 18 276 **Data collection and management**

### 19 277 *Patient-level data collection*

20  
21  
22 278 Consistent with the pragmatic design, TB treatment outcomes will be assessed by extracting data  
23  
24 279 on all eligible patients from routine Uganda NTLP TB treatment registers used at all treatment  
25  
26 280 units. Project staff will train two health workers at each site (one primary, one backup) identified  
27  
28 281 by the health facility director to take photos of the register every 2-4 weeks for the duration of the  
29  
30 282 project using a camera-enabled smartphone, and to upload the photos to a central secure, password-  
31  
32 283 protected server, only accessible to staff. Health workers will be trained to delete photos from the  
33  
34 284 phone after upload confirmation. Completeness of TB treatment registers will be assessed, and at  
35  
36 285 quarterly site visits, study staff will provide re-training as needed and resolve data cleaning queries.  
37  
38 286 Study staff will extract data from photos of TB registers and enter data into a secure database use  
39  
40 287 Research Electronic Data Capture software (REDCap).(23) Data queries for missing or  
41  
42 288 nonsensical data will be reviewed with treatment unit staff at quarterly site visits.

43 289

### 44 290 *99DOTS process metrics data collection*

45  
46 291 During the intervention period at each site, process metric data to assess the implementation of  
47  
48 292 each component of the intervention strategy will be extracted from the 99DOTS server. The server  
49  
50 293 logs all calls made by patients to confirm dosing and doses entered manually by providers, all SMS  
51  
52 294 messages sent to patients, and all IVR calls sent to patients and their responses.

53 295

### 54 296 *Qualitative data collection*

1  
2  
3 297 Surveys will be conducted with 10 randomly selected eligible patients enrolled on 99DOTS (5  
4 298 women and 5 men) and 1-2 eligible providers per site (180 total patients, 18-36 total providers)  
5 299 beginning in Month 10 of the trial to assess the acceptability of the 99DOTS-based intervention  
6 300 strategy. Research staff will contact selected patients by phone to review the verbal consent script,  
7 301 answer questions the patient may have, and administer the survey to consenting patients. Provider  
8 302 surveys and interviews will be conducted during quarterly site visits beginning in Month 13 of the  
9 303 trial to assess factors influencing the adoption and implementation of 99DOTS.  
10  
11  
12  
13  
14  
15  
16

#### 17 305 *Health system cost data collection*

18 306 Costing and cost-effectiveness analyses will focus on the health system perspective. Treatment  
19 307 unit staff at each site will be interviewed to gain a more complete understanding of the activities  
20 308 and staff involved in the operations of 99DOTS. Time-and-motion studies of health workers  
21 309 (anticipated to be 3-6 health workers per site, depending on the number of staff involved in  
22 310 delivering 99DOTS) will be carried out at six clinics, sampled to ensure good representation of  
23 311 clinic volume and geography. These time-and-motion studies will be performed on a quarterly  
24 312 basis in conjunction with site visits and will consist of direct observation of all activities conducted  
25 313 by treatment unit staff over the corresponding 1-2 day evaluation period, for a total 6-12 days of  
26 314 observation every three months over the course of the 14-month study period. During these  
27 315 observation periods, the time and resources required to perform all activities related to TB  
28 316 treatment (e.g., medication preparation, contacting patients, observing medication doses, etc.) will  
29 317 be recorded. Additional costing data will be collected to assess the cost of implementing and  
30 318 maintaining 99DOTS technical assistance (budget records from Everwell Health Solutions, the  
31 319 creator of 99DOTS) and the cost at point of care (surveys of project staff to track resource use  
32 320 during trainings). Overhead costs will be estimated using an ingredients approach, incorporating  
33 321 the cost of supplies, building/space, vehicles, and human resources with incorporation of recurrent  
34 322 costs such as security, vehicle maintenance costs, and all supplies (medical and administrative).  
35  
36  
37  
38  
39  
40  
41  
42  
43  
44  
45  
46  
47  
48  
49

#### 50 324 **Outcomes**

51 325 Trial outcomes were selected in accordance with the RE-AIM evaluation framework (**Table 2**).  
52 326 The primary effectiveness outcome is the proportion of patients who complete TB treatment,  
53 327 defined as having an outcome of “cured” or “treatment completed” recorded in the unit TB  
54  
55  
56  
57  
58  
59  
60



328 treatment register. Secondary effectiveness outcomes include the proportion who persist on  
 329 treatment through the intensive phase (*i.e.*, 56 days of treatment), the proportion lost to follow-up  
 330 and estimated number of incremental disability-adjusted life years (DALYs) averted. Reach is  
 331 defined as the proportion of eligible patients enrolled on 99DOTS. Adoption metrics include the  
 332 proportion of scheduled doses confirmed by patient phone calls and the proportion of weekly IVR  
 333 check-in calls to which patients send a response. Implementation outcomes include delivery of the  
 334 intervention (proportions of daily SMS dosing reminders and weekly IVR check-in calls sent by  
 335 the 99DOTS platform and received on patient handsets), acceptability (as assessed by patient and  
 336 health worker surveys and interviews) and incremental costs of the 99DOTS-based intervention  
 337 strategy.

338

339 **Table 2.** Outcome definitions and data source by RE-AIM dimension.

| Outcome type          | Outcome                                                          | Data Source                                    |
|-----------------------|------------------------------------------------------------------|------------------------------------------------|
| <b>Reach</b>          |                                                                  |                                                |
|                       | Proportion enrolled on 99DOTS                                    | 99DOTS server,<br>Treatment register           |
| <b>Effectiveness</b>  |                                                                  |                                                |
| Primary               | Proportion treated successfully                                  | Treatment register                             |
| Secondary             | Proportion with persistence                                      | Treatment register                             |
| Secondary             | Proportion lost to follow-up                                     | Treatment register                             |
| Secondary             | Incremental cost per patient treated successfully                | Time and motion surveys;<br>budgetary analysis |
| <b>Adoption</b>       |                                                                  |                                                |
|                       | Proportion of scheduled doses confirmed by phone call            | 99DOTS server                                  |
|                       | Proportion of weekly IVR calls to which patients send a response | 99DOTS server                                  |
| <b>Implementation</b> |                                                                  |                                                |
|                       | Proportion of daily SMS sent by 99DOTS platform                  | 99DOTS server                                  |
|                       | Proportion of daily SMS received on patient handset              | 99DOTS server                                  |
|                       | Proportion of weekly IVR calls sent by 99DOTS platform           | 99DOTS server                                  |
|                       | Proportion of weekly IVR calls received on patient handset       | 99DOTS server                                  |

340

341 *Power and sample size*

1  
2  
3 342 The trial aims to demonstrate the superiority of the 99DOTS-based strategy. The sample size was  
4  
5 343 calculated for the primary effectiveness outcome, proportion of patients treated successfully, using  
6  
7 344 formulae appropriate for stepped-wedge trials. A type I error of 5% and power of at least 90% is  
8  
9 345 assumed. Based on 2017 data, the harmonic mean number of patients initiating treatment for drug-  
10  
11 346 susceptible pulmonary TB per month across participating treatment units was 15. Thus, we  
12  
13 347 anticipate that approximately 1890 patients will initiate treatment over the 8-month enrollment  
14  
15 348 period (945 in the pre- and 945 in the post-implementation phases across treatment units). The trial  
16  
17 349 will have 89% power to demonstrate that our strategy increases the proportion of patients treated  
18  
19 350 successfully by 10% or more (assumptions:  $\alpha=0.05$ ; intraclass correlation coefficient, ICC =  
20  
21 351 0.001 calculated using 2017 NTLTP data for the 18 treatment units; pre-implementation treatment  
22  
23 352 success = 51% based on 2017 NTLTP data for the 18 treatment units; calculations performed using  
24  
25 353 steppedwedge command in Stata 14).

26 354

### 27 355 **Analysis**

28 356 The primary effectiveness analysis will be conducted at the health facility level using multivariable  
29  
30 357 mixed effect logit models with random effects for site and fixed effects for trial period, time, and  
31  
32 358 confounders (using Stata's `melogit` and `meqrlogit` commands). Analysis will be done for intention  
33  
34 359 to treat (all eligible patients) and per protocol (excluding patients who are not enrolled on 99DOTS  
35  
36 360 during the intervention period at each site) populations. Models will adjust for the longitudinal  
37  
38 361 design (indicator variable for each trial month) and clustering by site (random effect for health  
39  
40 362 facility). Patients initiating treatment during the month in which sites switch from routine treatment  
41  
42 363 supervision to the intervention strategy will be excluded (buffer period). Potential confounders,  
43  
44 364 selected *a priori*, including sex, HIV status, disease class (bacteriologically confirmed vs.  
45  
46 365 clinically diagnosed), and TB type (new vs. retreatment), will be included in the model as fixed  
47  
48 366 effects. Secondary effectiveness outcomes (**Table 2**) will be analyzed in the same manner.  
49  
50 367 Subgroup analyses will stratify by gender, HIV status, and health facility. To further assess the  
51  
52 368 robustness of our findings, [we will conduct sensitivity analyses that include patients who initiated  
53  
54 369 treatment during the buffer period, impute outcomes for patients lost to follow up and compare  
55  
56 370 treatment outcomes using permutation tests.](#)(24)

57 371

1  
2  
3 372 Quantitative reach, adoption and implementation outcomes will be summarized descriptively.  
4  
5 373 Comparative analyses will identify factors independently associated with reach, adoption and  
6  
7 374 implementation of intervention components. Health economic data will be used to calculate the  
8  
9 375 incremental cost-effectiveness of the intervention strategy from a health system perspective,  
10  
11 376 measured as the incremental cost per successfully completed treatment, comparing 99DOTS  
12 377 relative to routine care.

13  
14 378

### 15 379 **Ethics and dissemination**

16  
17 380 Patients can choose to use or not use 99DOTS at any time during the intervention period. 99DOTS  
18  
19 381 enables closer patient monitoring than routine TB treatment supervision, but loss of patient privacy  
20  
21 382 is a potential concern. Data on this are being collected through patient surveys. Because of the  
22  
23 383 low-risk nature of the research, the Principal Investigators will be responsible for monitoring the  
24  
25 384 data, assuring protocol compliance, and conducting safety reviews on a quarterly basis. External  
26  
27 385 monitoring is provided by a Stop TB Partnership project officer and Monitoring and Evaluation  
28  
29 386 consultant. The Principal Investigator will submit regular progress reports, including  
30  
31 387 recommendations on whether the project should continue unchanged, require modification, or  
32  
33 388 close to enrollment.

34  
35 389

36 390 Ethics approval was granted by institutional review boards at Makerere University School of  
37  
38 391 Public Health and the University of California San Francisco. To ensure that the study captures all  
39  
40 392 eligible adults initiating treatment at study sites, a waiver of informed consent was granted to  
41  
42 393 access routine TB treatment data recorded in standard NTLP registers, such that research staff will  
43  
44 394 not be required to be onsite to enroll and consent patients. The protocol was registered with the  
45  
46 395 Pan-African Clinical Trials Registry (PACTR201808609844917) on 31 August 2018, updated 7  
47  
48 396 November 2019 and complies with reporting guidelines outlined in the stepped-wedge trial  
49  
50 397 extension of the Consolidated Standards of Reporting Trials.(25) Any major changes in protocol  
51  
52 398 will be approved by the Stop TB Partnership project officer and both ethics committess and  
53  
54 399 registered with the PACTR. The full protocol and statistical code will be made available upon  
55  
56 400 request.

57  
58  
59 401

1  
2  
3 402 Findings will be disseminated through peer-reviewed publications, presentations at scientific  
4 403 conferences and presentations to key stakeholders. Drs. Cattamanchi, Katamba and Kiwanuka will  
5 404 have access to the final dataset; the participant-level dataset will be made available to other  
6 405 investigators who have IRB approval to analyze the data.  
7  
8  
9

10 406

### 11 407 **Patient and public involvement**

12 408 Patients and members of the public were involved throughout the research process. The NTLP was  
13 409 involved in identifying health facilities to participate, selecting study design, and conducting  
14 410 research through partnership with District Health Officers and participating health facilities.  
15 411 Patients, health workers, and community members were involved in intervention design through a  
16 412 human-centered design process, which included several rounds of focus groups and interviews  
17 413 with stakeholders. Health workers at the 18 health facilities implemented 99DOTS without  
18 414 research staff present and assisted in data collection by completing routine TB treatment registers  
19 415 and sending photos of the register to the research team through secure means.  
20  
21  
22  
23  
24  
25  
26  
27

28 416

### 29 417 **DISCUSSION**

30 418 99DOTS is a low-cost DAT that has the potential to improve TB treatment outcomes and the  
31 419 patient experience of TB treatment in Uganda and other high-burden settings. Here, we describe  
32 420 the first randomized trial designed to evaluate the effectiveness of a 99DOTS-based TB treatment  
33 421 supervision strategy as part of routine care in a high burden setting. Other novel aspects of the trial  
34 422 include our use of human-centered design to adapt 99DOTS to the local context with the goal of  
35 423 increasing patient engagement with the technology, the use of theory and implementation science  
36 424 frameworks to guide intervention design and evaluation, and our focus on simultaneously  
37 425 assessing implementation and costs to guide scale-up decisions.  
38  
39  
40  
41  
42  
43  
44

45 426

46 427 Many aspects of this trial are intentionally pragmatic to ensure the outcomes reflect what can be  
47 428 expected under non-research conditions.(26) The study population will include all patients with  
48 429 drug susceptible pulmonary TB, with the exception of children. A waiver of consent was obtained  
49 430 for patient-level data collection such that research staff will not be required to be onsite to enroll  
50 431 and consent patients. Primary and key secondary outcomes will be assessed using routine data  
51 432 available through NTLP registers and the 99DOTS platform, with focused additional data  
52  
53  
54  
55  
56  
57  
58  
59

1  
2  
3 433 collection for implementation and cost outcomes. The intervention will be implemented by routine  
4  
5 434 TB treatment unit staff, who also will make all decisions to offer 99DOTS-based treatment  
6  
7 435 supervision to patients. At the same time, the stepped-wedge randomized trial design provides a  
8  
9 436 rigorous assessment of intervention effect. Limitations of such a pragmatic trial design include less  
10  
11 437 control over intervention delivery, potential limited uptake of the intervention given the wide  
12  
13 438 inclusion criteria (all adults initiating treatment for drug-susceptible pulmonary TB) and inability  
14  
15 439 to rigorously verify medication adherence during the control and intervention periods. In order to  
16  
17 440 enroll enough patients to assess the effectiveness of the 99DOTS-based intervention, we selected  
18  
19 441 facilities that treat larger numbers of TB patients. Uptake and effectiveness of 99DOTS may be  
20  
21 442 different at lower volume health centers.

22 443  
23  
24 444 In summary, this pragmatic, hybrid type 2 effectiveness-implementation trial is well poised to  
25  
26 445 assess both the effectiveness of an adapted 99DOTS-based intervention and potential barriers and  
27  
28 446 facilitators to its scale-up if successful. The design and implementation of this trial intend to  
29  
30 447 generate results to inform decisions on whether and how to implement 99DOTS in Uganda and  
31  
32 448 other high burden countries.  
33  
34  
35  
36  
37  
38  
39  
40  
41  
42  
43  
44  
45  
46  
47  
48  
49  
50  
51  
52  
53  
54  
55  
56  
57  
58  
59  
60

450 **References**

- 451
- 452 1. World Health Organization. Global Tuberculosis Report. 2019.
- 453 2. Izudi J, Tamwesigire IK, Bajunirwe F. Explaining the successes and failures of tuberculosis  
454 treatment programs; a tale of two regions in rural eastern Uganda. *BMC Health Services*  
455 *Research*. 2019;19(1):979.
- 456 3. Fiseha D, Demissie M. Assessment of Directly Observed Therapy (DOT) following  
457 tuberculosis regimen change in Addis Ababa, Ethiopia: a qualitative study. *BMC Infect Dis*.  
458 2015;15:405.
- 459 4. GSMA Intelligence. The Mobile Economy - Africa London: GSMA; 2016 [Available from:  
460 <https://www.gsma.com/mobileeconomy/africa/>.
- 461 5. World Health Organization. Treatment of tuberculosis: guidelines for treatment of drug-  
462 susceptible tuberculosis and patient care (2017 update). Geneva; 2017.
- 463 6. Liu X, Lewis JJ, Zhang H, Lu W, Zhang S, Zheng G, et al. Effectiveness of Electronic  
464 Reminders to Improve Medication Adherence in Tuberculosis Patients: A Cluster-Randomised  
465 Trial. *PLoS medicine*. 2015;12(9):e1001876-e.
- 466 7. Subbaraman R, de Mondesert L, Musiimenta A, Pai M, Mayer KH, Thomas BE, et al.  
467 Digital adherence technologies for the management of tuberculosis therapy: mapping the  
468 landscape and research priorities. *BMJ Glob Health*. 2018;3(5):e001018.
- 469 8. Liu X, Lewis JJ, Zhang H, Lu W, Zhang S, Zheng G, et al. Effectiveness of Electronic  
470 Reminders to Improve Medication Adherence in Tuberculosis Patients: A Cluster-Randomised  
471 Trial. *PLoS Med*. 2015;12(9):e1001876.
- 472 9. Liu X, Blaschke T, Thomas B, De Geest S, Jiang S, Gao Y, et al. Usability of a Medication  
473 Event Reminder Monitor System (MERM) by Providers and Patients to Improve Adherence in  
474 the Management of Tuberculosis. *Int J Environ Res Public Health*. 2017;14(10).
- 475 10. Thakkar D, Piparva KG, Lakkad SG. A pilot project: 99DOTS information communication  
476 technology-based approach for tuberculosis treatment in Rajkot district. *Lung India*.  
477 2019;36(2):108-11.
- 478 11. Cross A, Gupta N, Liu B, Nair V, Kumar A, Kuttan R, et al. 99DOTS: A Low-Cost Approach  
479 to Monitoring and Improving Medication Adherence. Tenth International Conference on  
480 Information and Communication Technologies and Development. ICTD. 2019.
- 481 12. Green LW, Kreuter MW. Health promotion planning: An educational and ecological  
482 approach: McGraw-Hill; 1993.
- 483 13. Atkins L, Francis J, Islam R, O'Connor D, Patey A, Ivers N, et al. A guide to using the  
484 Theoretical Domains Framework of behaviour change to investigate implementation problems.  
485 *Implement Sci*. 2017;12(1):77.
- 486 14. French SD, Green SE, O'Connor DA, McKenzie JE, Francis JJ, Michie S, et al. Developing  
487 theory-informed behaviour change interventions to implement evidence into practice: a  
488 systematic approach using the Theoretical Domains Framework. *Implement Sci*. 2012;7:38.
- 489 15. Sarfaraz J. Unified theory of acceptance and use of technology (Utaut) model-mobile  
490 banking. *Journal of Internet Banking and Commerce*. 2017;22(3):1-20.
- 491 16. Venkatesh V, Thong JY, Xu X. Consumer acceptance and use of information technology:  
492 extending the unified theory of acceptance and use of technology. *MIS quarterly*. 2012:157-78.

- 1  
2  
3 493 17. Glasgow RE, Vogt TM, Boles SM. Evaluating the public health impact of health  
4 494 promotion interventions: the RE-AIM framework. *American journal of public health.*  
5 495 1999;89(9):1322-7.  
6  
7 496 18. Gaglio B, Shoup JA, Glasgow RE. The RE-AIM framework: a systematic review of use over  
8 497 time. *American journal of public health.* 2013;103(6):e38-e46.  
9  
10 498 19. Curran GM, Bauer M, Mittman B, Pyne JM, Stetler C. Effectiveness-implementation  
11 499 hybrid designs: combining elements of clinical effectiveness and implementation research to  
12 500 enhance public health impact. *Med Care.* 2012;50(3):217-26.  
13 501 20. Loudon K, Treweek S, Sullivan F, Donnan P, Thorpe KE, Zwarenstein M. The PRECIS-2  
14 502 tool: designing trials that are fit for purpose. *BMJ.* 2015;350:h2147.  
15 503 21. Ggita JM, Ojok C, Meyer AJ, Farr K, Shete PB, Ochom E, et al. Patterns of usage and  
16 504 preferences of users for tuberculosis-related text messages and voice calls in Uganda. *Int J*  
17 505 *Tuberc Lung Dis.* 2018;22(5):530-6.  
18  
19 506 22. Babirye D, Shete PB, Farr K, Nalugwa T, Ojok C, Nantale M, et al. Feasibility of a short  
20 507 message service (SMS) intervention to deliver tuberculosis testing results in peri-urban and  
21 508 rural Uganda. *J Clin Tuberc Other Mycobact Dis.* 2019;16:100110.  
22  
23 509 23. Harris PA, Taylor R, Minor BL, Elliott V, Fernandez M, O'Neal L, et al. The REDCap  
24 510 consortium: Building an international community of software platform partners. *J Biomed*  
25 511 *Inform.* 2019;95:103208.  
26  
27 512 24. Thompson J, Davey C, Hayes R, Hargreaves J, Fielding K. swpermutate: Permutation tests  
28 513 for Stepped-Wedge Cluster-Randomised Trials. *The Stata journal.* 2019;19(4):803-19.  
29 514 25. Hemming K, Taljaard M, McKenzie JE, Hooper R, Copas A, Thompson JA, et al. Reporting  
30 515 of stepped wedge cluster randomised trials: extension of the CONSORT 2010 statement with  
31 516 explanation and elaboration. *BMJ.* 2018;363:k1614.  
32  
33 517 26. Loudon K, Treweek S, Sullivan F, Donnan P, Thorpe KE, Zwarenstein M. The PRECIS-2  
34 518 tool: designing trials that are fit for purpose. *BMJ : British Medical Journal.* 2015;350:h2147.  
35 519

36  
37 520  
38  
39  
40  
41  
42  
43  
44  
45  
46  
47  
48  
49  
50  
51  
52  
53  
54  
55  
56  
57  
58  
59  
60

## 521 **Acknowledgements**

522 We would like to thank the patients and health facility staff who make this research possible, as  
523 well as the Uganda NTLP, for their collaboration on this protocol.

## 525 **Authors' contributions**

526 AC, AKa, and NK conceived and designed the study. RC, AKi, ML, CN, LKT, ASN, JG, PT, DB,  
527 DO, CB, AT, DP, AM, DD, TS, AC and AKa participated in implementation of the study. RC,  
528 AKi, AC, and AKa drafted the manuscript. All authors reviewed and approved the manuscript.

## 530 **Funding**

531 This Project is supported by the Stop TB Partnership's TB REACH initiative, grant number  
532 STBP/TBREACH/GSA/W6-37, which is funded by the Government of Canada, the Bill &  
533 Melinda Gates Foundation, and the United States Agency for International Development. The  
534 study sponsor is not involved in data collection, analysis or interpretation.

## 536 **Competing Interests**

537 The authors have no conflicts of interest to report.

539 **Figure 1. 99DOTS Randomization and Enrollment Schedule.** The trial includes 18 health  
540 facilities divided into 6 equal size blocks (3 health facilities per block). The health facilities all  
541 continue routine TB treatment supervision in Month 1, begin switching to the 99DOTS-based  
542 intervention strategy in Month 2 (one block per month in a random order), and all use the  
543 intervention strategy in Month 8.

545 **Figure 2. Flow diagram of TB treatment units and patients included in the DOT to DAT**  
546 **trial.** Eighteen TB treatment units were randomized, and all eligible patients initiating TB  
547 treatment at these facilities during the study period will be analyzed.

549 **Figure 3. Original and adapted versions of the 99DOTS envelope.** The original 99DOTS  
550 envelope was two-sided (top left and right). The original envelope was adapted using human-  
551 centered design to add a decorative front cover to hide pills (and thereby reduce potential stigma;  
552 bottom left); include space for writing in the health worker's name and phone number, simplified  
553 pictorial instructions for taking pills, and motivational imagery on the inside cover (bottom  
554 middle); and provide simplified guide to the order in which to take pills on the back cover (bottom



1  
2  
3 555 right). In addition, the audio tone heard when patients make daily phone calls to report medication  
4 556 dosing was replaced with a rotating series of educational or motivational messages recorded by  
5 557 local health workers.  
6 558

7  
8  
9  
10  
11  
12  
13  
14  
15  
16  
17  
18  
19  
20  
21  
22  
23  
24  
25  
26  
27  
28  
29  
30  
31  
32  
33  
34  
35  
36  
37  
38  
39  
40  
41  
42  
43  
44  
45  
46  
47  
48  
49  
50  
51  
52  
53  
54  
55  
56  
57  
58  
59  
60

For peer review only

|         | Month |   |   |   |   |   |   |   |
|---------|-------|---|---|---|---|---|---|---|
|         | 1     | 2 | 3 | 4 | 5 | 6 | 7 | 8 |
| Block 1 |       |   |   |   |   |   |   |   |
| Block 2 |       |   |   |   |   |   |   |   |
| Block 3 |       |   |   |   |   |   |   |   |
| Block 4 |       |   |   |   |   |   |   |   |
| Block 5 |       |   |   |   |   |   |   |   |
| Block 6 |       |   |   |   |   |   |   |   |

  

|  |                                             |
|--|---------------------------------------------|
|  | Routine care (control period)               |
|  | Switch to 99DOTS (buffer period)            |
|  | 99DOTS implementation (intervention period) |

**Figure 1. 99DOTS Randomization and Enrollment Schedule.** The trial includes 18 health facilities divided into 6 equal size blocks (3 health facilities per block), each block representing an allocation sequence. The health facilities all continue routine TB treatment supervision in Month 1, begin switching to the 99DOTS-based intervention strategy in Month 2 (one block per month in a random order), and all use the intervention strategy in Month 8.



29  
30  
31  
32  
33  
34  
35  
36  
37  
38  
39  
40  
41  
42  
43  
44  
45  
46  
47  
48  
49  
50  
51  
52  
53  
54  
55  
56  
57  
58  
59  
60

**Figure 2. Flow diagram of TB treatment units and patients included in the DOT to DAT trial.** Eighteen TB treatment units were randomized, and all eligible patients initiating TB treatment at these facilities during the study period will be analyzed.

## Original 99DOTS Envelope

Front of envelope

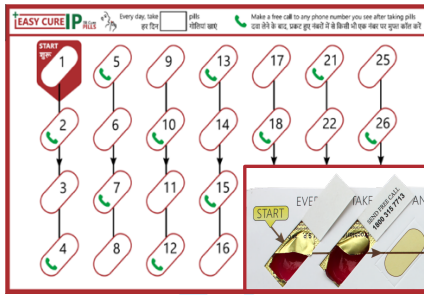

Back of envelope

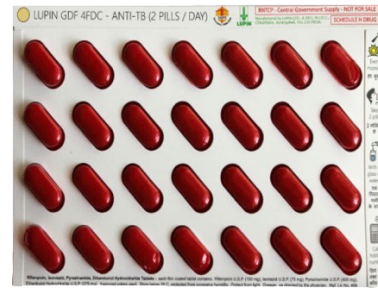

## Adapted 99DOTS envelope

Front cover

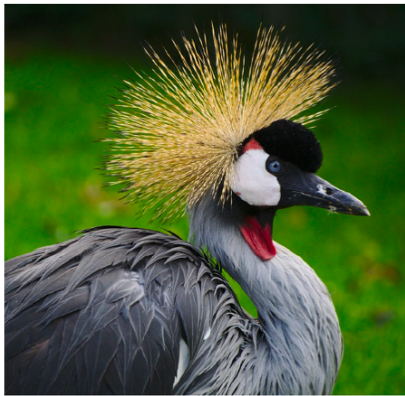

Inside cover

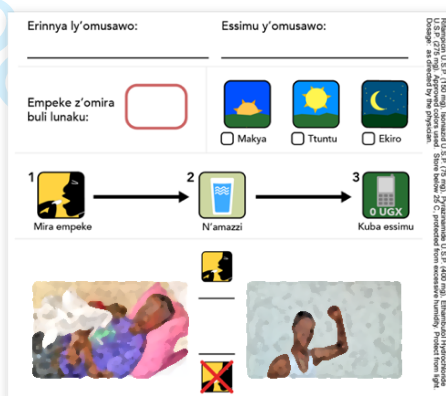

Back of envelope



**Figure 3. Original and adapted versions of the 99DOTS envelope.** The original 99DOTS envelope was two-sided (top left and right). The original envelope was adapted using human-centered design to add a decorative front cover to hide pills (and thereby reduce potential stigma; bottom left); include space for writing in the health worker's name and phone number, simplified pictorial instructions for taking pills, and motivational imagery on the inside cover (bottom middle); and provide simplified guide to the order in which to take pills on the back cover (bottom right). In addition, the audio tone heard when patients make daily phone calls to report medication dosing was replaced with a rotating series of educational or motivational messages recorded by local health workers.

| <b>Supplementary materials 3: Checklist of information to include when reporting a stepped wedge cluster randomised trial (SW-CRT)</b> |                |                                                                                                                                                                                                                                                                                                                      |                |
|----------------------------------------------------------------------------------------------------------------------------------------|----------------|----------------------------------------------------------------------------------------------------------------------------------------------------------------------------------------------------------------------------------------------------------------------------------------------------------------------|----------------|
| <b>Topic</b>                                                                                                                           | <b>Item no</b> | <b>Checklist item</b>                                                                                                                                                                                                                                                                                                | <b>Page no</b> |
| <b>Title and abstract</b>                                                                                                              |                |                                                                                                                                                                                                                                                                                                                      |                |
|                                                                                                                                        | 1a             | Identification as a SW-CRT in the title.                                                                                                                                                                                                                                                                             |                |
|                                                                                                                                        | 1b             | Structured summary of trial design, methods, results, and conclusions (see separate SW-CRT checklist for abstracts).                                                                                                                                                                                                 |                |
| <b>Introduction</b>                                                                                                                    |                |                                                                                                                                                                                                                                                                                                                      |                |
| Background and objectives                                                                                                              | 2a             | Scientific background. Rationale for using a cluster design and rationale for using a stepped wedge design.                                                                                                                                                                                                          |                |
|                                                                                                                                        | 2b             | Specific objectives or hypotheses.                                                                                                                                                                                                                                                                                   |                |
| <b>Methods</b>                                                                                                                         |                |                                                                                                                                                                                                                                                                                                                      |                |
| Trial design                                                                                                                           | 3a             | Description and diagram of trial design including definition of cluster, number of sequences, number of clusters randomised to each sequence, number of periods, duration of time between each step, and whether the participants assessed in different periods are the same people, different people, or a mixture. |                |
|                                                                                                                                        | 3b             | Important changes to methods after trial commencement (such as eligibility criteria), with reasons.                                                                                                                                                                                                                  |                |
| Participants                                                                                                                           | 4a             | Eligibility criteria for clusters and participants.                                                                                                                                                                                                                                                                  |                |
|                                                                                                                                        | 4b             | Settings and locations where the data were collected.                                                                                                                                                                                                                                                                |                |
| Interventions                                                                                                                          | 5              | The intervention and control conditions with sufficient details to allow replication, including whether the intervention was maintained or repeated, and whether it was delivered at the cluster level, the individual participant level, or both.                                                                   |                |
| Outcomes                                                                                                                               | 6a             | Completely defined prespecified primary and secondary outcome measures, including how and when they were assessed.                                                                                                                                                                                                   |                |
|                                                                                                                                        | 6b             | Any changes to trial outcomes after the trial commenced, with reasons.                                                                                                                                                                                                                                               |                |
| Sample size                                                                                                                            | 7a             | How sample size was determined. Method of calculation and relevant parameters with sufficient detail so the calculation can be replicated. Assumptions made about correlations between outcomes of participants from the same cluster. (see separate checklist for SW-CRT sample size items).                        |                |
|                                                                                                                                        | 7b             | When applicable, explanation of any interim analyses and stopping guidelines.                                                                                                                                                                                                                                        |                |
| <b>Randomisation</b>                                                                                                                   |                |                                                                                                                                                                                                                                                                                                                      |                |
| Sequence generation                                                                                                                    | 8a             | Method used to generate the random allocation to the sequences of treatments.                                                                                                                                                                                                                                        |                |
|                                                                                                                                        | 8b             | Type of randomisation; details of any constrained randomisation or stratification, if used.                                                                                                                                                                                                                          |                |
| Allocation concealment mechanism                                                                                                       | 9              | Specification that allocation was based on clusters; description of any methods used to conceal the allocation from the clusters until after recruitment.                                                                                                                                                            |                |
| Implementation                                                                                                                         | 10a            | Who generated the randomisation schedule, who enrolled clusters, and who assigned clusters to sequences.                                                                                                                                                                                                             |                |
|                                                                                                                                        | 10b            | Mechanism by which individual participants were included in clusters for the purposes of the trial (such as complete enumeration, random sampling; continuous recruitment or ascertainment; or recruitment at a fixed point in time), including who recruited or identified participants.                            |                |
|                                                                                                                                        | 10c            | Whether, from whom and when consent was sought and for what; whether this differed between treatment conditions.                                                                                                                                                                                                     |                |
| Blinding                                                                                                                               | 11a            | If done, who was blinded after assignment to sequences (eg, cluster level participants, individual level participants, those assessing outcomes) and how.                                                                                                                                                            |                |
|                                                                                                                                        | 11b            | If relevant, description of the similarity of treatments.                                                                                                                                                                                                                                                            |                |
| Statistical methods                                                                                                                    | 12a            | Statistical methods used to compare treatment conditions for primary and secondary outcomes including how time effects, clustering and repeated measures were taken into account.                                                                                                                                    |                |
|                                                                                                                                        | 12b            | Methods for additional analyses, such as subgroup analyses, sensitivity analyses, and adjusted analyses.                                                                                                                                                                                                             |                |

*(Continued)*

1  
2  
3  
4  
5  
6  
7  
8  
9  
10  
11  
12  
13  
14  
15  
16  
17  
18  
19  
20  
21  
22  
23  
24  
25  
26  
27  
28  
29  
30  
31  
32  
33  
34  
35  
36  
37  
38  
39  
40  
41  
42  
43  
44  
45  
46  
47  
48  
49  
50  
51  
52  
53  
54  
55  
56  
57  
58  
59  
60

| <b>Supplementary materials 3 (Continued)</b>         |                |                                                                                                                                                                                                                                                                   |                |
|------------------------------------------------------|----------------|-------------------------------------------------------------------------------------------------------------------------------------------------------------------------------------------------------------------------------------------------------------------|----------------|
| <b>Topic</b>                                         | <b>Item no</b> | <b>Checklist item</b>                                                                                                                                                                                                                                             | <b>Page no</b> |
| <b>Results</b>                                       |                |                                                                                                                                                                                                                                                                   |                |
| Participant flow (a diagram is strongly recommended) | 13a            | For each treatment condition or allocated sequence, the numbers of clusters and participants who were assessed for eligibility, were randomly assigned, received intended treatments, and were analysed for the primary outcome (see separate SW-CRT flow chart). |                |
|                                                      | 13b            | For each treatment condition or allocated sequence, losses and exclusions for both clusters and participants with reasons.                                                                                                                                        |                |
| Recruitment                                          | 14a            | Dates defining the steps, initiation of intervention, and deviations from planned dates. Dates defining recruitment and follow-up for participants.                                                                                                               |                |
|                                                      | 14b            | Why the trial ended or was stopped.                                                                                                                                                                                                                               |                |
| Baseline data                                        | 15             | Baseline characteristics for the individual and cluster levels as applicable for each treatment condition or allocated sequence.                                                                                                                                  |                |
| Numbers analysed                                     | 16             | The number of observations and clusters included in each analysis for each treatment condition and whether the analysis was according to the allocated schedule.                                                                                                  |                |
| Outcomes and estimation                              | 17a            | For each primary and secondary outcome, results for each treatment condition, and the estimated effect size and its precision (such as 95% confidence interval); any correlations (or covariances) and time effects estimated in the analysis.                    |                |
|                                                      | 17b            | For binary outcomes, presentation of both absolute and relative effect sizes is recommended.                                                                                                                                                                      |                |
| Ancillary analyses                                   | 18             | Results of any other analyses performed, including subgroup analyses and adjusted analyses, distinguishing prespecified from exploratory.                                                                                                                         |                |
| Harms                                                | 19             | Important harms or unintended effects in each treatment condition (for specific guidance see CONSORT for harms).                                                                                                                                                  |                |
| <b>Discussion</b>                                    |                |                                                                                                                                                                                                                                                                   |                |
| Limitations                                          | 20             | Trial limitations, addressing sources of potential bias, imprecision, and, if relevant, multiplicity of analyses.                                                                                                                                                 |                |
| Generalisability                                     | 21             | Generalisability (external validity, applicability) of the trial findings. Generalisability to clusters or individual participants, or both (as relevant).                                                                                                        |                |
| Interpretation                                       | 22             | Interpretation consistent with results, balancing benefits and harms, and considering other relevant evidence.                                                                                                                                                    |                |
| <b>Other information</b>                             |                |                                                                                                                                                                                                                                                                   |                |
| Registration                                         | 23             | Registration number and name of trial registry.                                                                                                                                                                                                                   |                |
| Protocol                                             | 24             | Where the full trial protocol can be accessed, if available.                                                                                                                                                                                                      |                |
| Funding                                              | 25             | Sources of funding and other support (such as supply of drugs), and the role of funders.                                                                                                                                                                          |                |
| Research ethics review                               | 26             | Whether the study was approved by a research ethics committee, with identification of the review committee(s). Justification for any waiver or modification of informed consent requirements.                                                                     |                |

This checklist has been taken from table 3 in *BMJ* 2018;363:k1614, as a standalone document for readers to print out or fill in electronically.
